# Supplementary material
Source: HighWire-hosted journal article supplement (http://dmd.aspetjournals.org/highwire/filestream/69839/field_highwire_adjunct_files/1/B4Z-LC-LYAM_40mg_PO_ATM.xlsx)
Supplement: B4Z-LC-LYAM_40mg_PO_ATM.xlsx [file B4Z-LC-LYAM_40mg_PO_ATM.xlsx]

## Sheet: Summary
Simcyp Population Based Simulator
2017-06-12 13:13:46
Simcyp Version 14 (08/10/2014)
Input Parameters
Output Parameters
Input Parameters
Workspace	<no workspace loaded>
Substrate	WH-In Vivo Backcalculated ATM-final
Simulation Mode	PKPD Parameters + PKPD Profiles
	Substrate				Substrate
Compound Name	WH-In Vivo Backcalculated ATM-final			Absorption Model	1st order
Mol Weight (g/mol)	255.36			Permeability Assay	n/a
log P	3.9			Peff,man	Regional
Compound Type	Monoprotic Base
pKa 1	9.8			Distribution Model	Full PBPK Model
pKa 2	n/a			Vss	Predicted
B/P	0.623			Prediction Method	Method 2
Haematocrit	45
fu	0.025			Clearance Type	Enzyme Kinetics
Trial Design
					Substrate
Population Name	Weize-ATM-LYAM population			Route	Oral
Use Pop Representative	No			Sub : Dose Units	Dose (mg)
Population Size	100			Sub : Dose	40
Number of Trials	1			Dosing time	Day 1, 09:00
No. of Subjects per Trial	100			Dosing Regimen	Single Dose
Start Day/Time	Day 1, 09:00
End Day/Time	Day 3, 09:00
Study Duration (h)	48			Fasted/Fed	Fasted
Sampling Time	Pre-defined Uniform
Sampling Site Selection	Off
Output Parameters
PKPD Parameters	Mean	Median	Geometric mean	Confidence Interval		Can be found in Excel sheet
CL (L/h)	15.1364	13.7883	13.7729	12.6259	15.0241	Clearance Trials SS
CLpo (L/h)	31.1644	24.4788	25.9252	23.029	29.1855	Clearance Trials SS
fa (Sub)	0.851032	0.878217	0.836975	0.806448	0.868658	Clearance Trials SS
Fg (Sub)	0.880569	0.891511	0.878383	0.86608	0.89086	Clearance Trials SS
Fh (Sub)	0.732918	0.752598	0.722616	0.698347	0.747728	Clearance Trials SS
F (Sub)	0.546815	0.549988	0.531256	0.505997	0.557776	Clearance Trials SS
Vss (Subs)(L/Kg)	0.738243	0.733461	0.732778	0.71536	0.750619	Distribution - Vols
PKPD Profiles	Mean	Median	Geometric mean	Confidence Interval		Can be found in Excel sheet
CMax (mg/L)	0.340788	0.336575	0.321455	0.300049	0.344389	AUC0(Sub)(CPlasma)
TMax (h)	0.685631	0.650164	0.640992	0.596976	0.688253	AUC0(Sub)(CPlasma)
AUC (mg/L.h)	1.82391	1.63445	1.54185	1.36993	1.73536	AUC0(Sub)(CPlasma)
CL (Dose/AUC)(L/h)	31.17	24.4768	25.9428	23.05	29.1986	AUC0(Sub)(CPlasma)

## Sheet: Input Sheet
Simcyp Population Based Simulator
2017-06-12 13:13:46
Simcyp Version 14 (08/10/2014)
Substrate			Trial Design			Software Version Detail
Compound Name	WH-In Vivo Backcalculated ATM-final		Use Pop Representative	No		Simulation Duration(seconds)	10
Version number	Not applicable		Population Size	100		Windows Version	Version 6.2 (Build 9200: )
Compound Type	Small Molecule		Number of Trials	1		Source File Location
Route	Oral		No of Subjects per Trial	100		Data Path Location
Sub : Dose Units	Dose (mg)		Population name	Weize-ATM-LYAM population		Excel Embedded Workspace	No
Sub : Dose	40		Version number	Not applicable		Simcyp.exe
Start Day	1		Minimum Age (years)	20		File Version
Start Time	9h0m		Maximum Age (years)	55		Date Modified
Dosing Regimen	Single Dose		Propn. of Females	0.55		File Size (bytes)
			Fasted/Fed	Fasted
PhysChem and Blood Binding			Fluid intake with dose (mL)	250		Login name	Supersimulator\isolab
			Fluid intake with dose CV (%)	30		Computer name	SUPERSIMULATOR
Mol Weight (g/mol)	255.36		PKPD Parameters	On		Licence type
log P	3.9		PKPD Profiles	On
Compound Type	Monoprotic Base		Start Day/Time	Day 1, 09:00		Login name	Supersimulator\isolab
pKa 1	9.8		End Day/Time	Day 3, 09:00		Computer name	SUPERSIMULATOR
BP Input	User Input		Study Duration (h)	48		Licence type
B/P	0.623
Haematocrit	45		Sub : Route	Oral
fu Input	User		Sub : Dose Units	Dose (mg)
fu	0.025		Sub : Dose	40
Reference Binding Component	HSA		Sub : Dosing	Single Dose
Protein Reference Conc (g/L)	45		Sub : Dose Interval	n/a
% Bound to Lipoprotein	0		Sub : NoDoses	n/a
% Bound to Lipoprotein (CV %)	0
			Random Generator	Mersenne Twister (MT19937)
Absorption			Seed	Random
			Seed Value	59
Absorption Model	1st order
Input Type	Entered		Solver sampling interval (h)	0.05
fa	0.96		Sampling Time	Pre-defined Uniform
CV fa (%)	30		Number of time samples	200
ka (1/h)	1.2
CV ka (%)	30		Sampling Site Selection	Off
lag time (h)	0
CV lag time (%)	30		AUCt for the first dose	Off
fu(Gut) Input Type	User		AUC_INF for the first dose	Off
fu(Gut)	1		AUCt for the last dose	Off
Q(Gut) Input	Predicted		AUC Calculation Method	Linear Trapezoid
Peff,man Type	n/a
Permeability Method	Mechanistic Model		Memory Size	1400000
Effective Concentration for Permeation	Free Aqueous		Number of time samples	200
Intrinsic Transcellular Permeability Type	Predicted		Solubility Cap (mg/mL)	500
Prediction method	logPo:w		Differential Solver	5th-order Runge-Kutta
Slope	2.381		Maximum number of steps	1000000
Exponent	1.197		Relative Tolerance	1e-15
Include Ion Transcellular Permeation	NO		Relative Tolerance when ADAM is used	1e-09
Apply Accessible Surface Area Scalar	YES		Integration error tolerance	0.001
Force Unstirred boundary layer pH to bulk pH	NO
Paracellular Scalar	0.00039		Paediatric Module	Not Loaded
Pore Electric Gradient Potential Drop (mV)	-64.145		No. Differential Equations	28
Distribution
Distribution Model	Full PBPK Model
Replacement Organ?	No
Organ Replaced	n/a
User-defined Additional Organ	No
Type	n/a
Vss mode	Predicted
Prediction Method	Method 2
Concentration-dependent volume	No
log Po:w	3.9
logP vo:w	Predicted
logP vo:w value	2.9985
Compound Type	Monoprotic Base
pKa 1	9.8
B/P	0.623
Haematocrit	45
fu	0.025
Adipose Input Type	Predicted
Adipose Value	0.287796
Bone Input Type	Predicted
Bone Value	0.42358
Brain Input Type	Predicted
Brain Value	0.242587
Gut Input Type	Predicted
Gut Value	1.52357
Heart Input Type	Predicted
Heart Value	1.61226
Kidney Input Type	Predicted
Kidney Value	0.84394
Liver Input Type	Predicted
Liver Value	2.65871
Lung Input Type	Predicted
Lung Value	0.29685
Muscle Input Type	Predicted
Muscle Value	1.33281
Skin Input Type	Predicted
Skin Value	0.718783
Spleen Input Type	Predicted
Spleen Value	1.49314
Pancreas Input Type	Predicted
Pancreas Value	0.929627
Kp Scalar Value	1
Elimination
Allometric Scaling	Not Used
Clearance Type	Enzyme Kinetics
FI Correction	Not used
PLR Correction	Not Used
In vitro metabolic system	Recombinant
Pathway	4-OH
Enzyme	CYP2D6
CLint (µL/min/pmol of isoform)	25.4579
fu mic	1
Pathway	4-OH
Enzyme	CYP2C19
CLint (µL/min/pmol of isoform)	1.84184
fu mic	1
Feed formed renal metabolite into kidney	No
Use Allelic variants for Enzyme 1	No
Enzyme	CYP2C9
Use Allelic variants for Enzyme 2	No
Enzyme	CYP1A2
Additional HLM CLint	0.00843627
Additional HLM CV (%)	30
Additional HLM fumic	1
Ontogeny Profile	No Profile Used
Biliary CLint (Hep) (µL/min/106)	0
CV Biliary CLint (Hep) (%)	30
Ontogeny Profile	No Profile Used
Active Uptake into Hepatocyte	1
CL R (L/h)	0.185
CYPs and/or UGTs Interaction
Enzyme	CYP2D6
Ki (µM)	3.6
fu mic	1
Enzyme	CYP3A4
Ki (µM)	34.3
fu mic	1
Transport

## Sheet: Weize-ATM-LYAM population
Population		Population : Liver		Population : Kidney		Population : Skin		Population : GI Tract		Population : Lung		Tissue Composition		Tissue Blood Flow Rates		Population : Brain		Population : Additional Organ		Population : FcRn IgG		Population : Lymph		Population : Target
Ref Bodyweight (kg)	80.7056	Liver model	Well Stirred	Male Baseline 1	76.5	Forearm		Dep of Duod. on BSA:C1 Len	0.205	Ventillation-perfusion ratio: Mean	1	Adipose : EW (%)	14.1	Adipose : Male (% of Qc)	5	CSF Flow		Additional Organ : EW (%)	14.1	IgG Concentration (µM)	80.7	% of total lymph flow (Adipose)	5	Target1 Name	TNF-alpha
Maximum Age (years)	55	Dispersion Value	n/a	Male Baseline 1 CV (%)	16.1	SCorneum Thickness (µm) : Male	15.7	Dep of Duod. on BSA:Exp Len	0.55	Ventillation-perfusion ratio: CV (%)	35	Adipose : NL (%)	79	Adipose : Female (% of Qc)	8.5	CSF production rate (L/h)	0.021	Additional Organ : IW (%)	3.9	IgG Concentration CV	12.6	% of total lymph flow (Bone)	5	Target1 Rmax (µM)	4.42e-06
Minimum Age (years)	20	Liver weight : Slope vs BSA	0.722	Male Age Cut-Off	61	SCorneum Thickness CV(%) : Male	33	Dep of Duod. on BSA:C1 Dia	0.033	Volume Airway (L): Mean	0.1	Adipose : NP (%)	0.2	Bone : Male (% of Qc)	5	CSF production rate CV(%)	10	Additional Organ : NL (%)	79	IgG KD (µM)	0.728	% of total lymph flow (Brain)	2	Target1 Rmax CV	30
Propn of Females	0.55	Operational Concentrations	Liver Compartment (Outlet)	Male Age Cut-off Baseline	81.2	SCorneum Thickness (µm) : Female	15.7	Dep of Duod. on BSA:Exp Dia	0.383	Volume Airway (L): CV (%)	30	Bone : EW (%)	9.8	Bone : Female (% of Qc)	5	Bulk flow from brain to CSF (% CSF production)	25	Additional Organ : NP (%)	0.2	IgG KD CV	10	% of total lymph flow (Stomach and Oesophagus)	10	Target1 Kdeg (1/h)	0.877
BSA C1 Param	0.007184	Liver weight : Intcpt vs BSA	1.176	Male Age Cut-Off CV1 (%)	27.4	SCorneum Thickness CV(%) : Female	34	Jej-Ileum Ratio:Jej Len	0.4	Volume Alveoli (L): Mean	5.6	Bone : NL (%)	7.4	Brain : Male (% of Qc)	12	Bulk flow from brain to CSF (% CSF production) CV(%)	8	Additional Organ : AP (mg/g)	0.4	IgG KDcomplex (µM)	0.728	% of total lymph flow (Heart)	4	Target1 Kdeg CV	30
BSA Wt Exp	0.425	Liver Volume CV (%)	12	Male Age Cut-Off CV2 (%)	21.2	SCorneum Fat (%) : Male	12.9	Enterocyte Volume (L)	0.517	Volume Alveoli (L): CV (%)	10	Bone : NP (%)	0.11	Brain : Female (% of Qc)	12	CSF spinal absorption rate (%)	38	Additional Organ : KpALB	0.151	IgG KDcomplex CV	30	% of total lymph flow (Kidney)	19	Target1 Kshed (1/hr)	0
BSA Ht Exp	0.725	Liver Density	1080	Female Baseline 1	57	SCorneum Fat CV(%) : Male	30	Jej-Ileum Ratio:Jej/Duo Dia C1	0.8125	Volume Pulmonary Capilliary Blood (L): Mean	0.065	Brain : EW (%)	9.2	Pancreas : Male (% of Qc)	1	CSF spinal absorption rate CV(%)	30	Additional Organ : KpLPP	0.068	IgG Catabolic CL (L/h)	8	% of total lymph flow (Liver)	20	Target1 Kshed CV	30
Male Body Weight C0	2.643	MPPGL : Baseline	1.407	Female Baseline CV (%)	20.4	SCorneum Fat (%) : Female	12.9	Jej-Ileum Ratio:Il/Duo Dia C1	0.725	Volume Pulmonary Capilliary Blood (L): CV (%)	20	Brain : NL (%)	5.1	Pancreas : Female (% of Qc)	1	Bulk flow from spinal CSF to cranial CSF (% CSF spinal absorption rate)	90	Additional Organ Local pH : EW	7.4	IgG Catabolic CL CV	10	% of total lymph flow (Lung)	10	Target1 Lambda (1/h)	0
Male Body Weight C1	0.0099	MPPGL : C1	0.01579	Female Age Cut-Off 1	48	SCorneum Fat CV(%) : Female	30	Dep of LG on BSA :C1	5.231	Volume Epithelial Lining Fluid (L): Mean	0.025	Brain : NP (%)	5.65	Stomach : Male (% of Qc)	1	Bulk flow from spinal CSF to cranial CSF (% CSF spinal absorption rate) CV(%)	100	Additional Organ Local pH : IW	7	IgG Catabolic CLcomplex (L/h)	0.0175	% of total lymph flow (Muscle)	17	Target2 Name	IgE
Male Body Weight CV (%)	15	MPPGL : C2	-0.0003824	Female Age Cut-Off Baseline 2	66.2	VEpidermis Thickness (µm) : Male	50.7	Dep of LG on BSA :Exp	0.414	Volume Epithelial Lining Fluid(L): CV (%)	20	Gut : EW (%)	26.7	Stomach : Female (% of Qc)	1	CSF Volume		Additional Organ : Male (% of Qc)	0.65	IgG Catabolic CLcomplex CV	30	% of total lymph flow (Pancreas)	1	Target2 Rmax (µM)	0.00225
Male Height C0	175.32	MPPGL : C3	2.37e-06	Female Age Cut-off 1 CV 1 (%)	26.5	VEpidermis Thickness CV(%) : Male	24	Dep of LG on BSA :CV LG Len	20	Surface Area Airway (m2): Mean	1.5	Gut : NL (%)	4.87	SI : Male (% of Qc)	10	CSF (% Brain volume) : Male	10.5	Additional Organ : Female (% of Qc)	0.65	FcRn Concentration (µM)	40	% of total lymph flow (Skin)	5	Target2 Rmax CV	30
Male Height C1	0.1113	MPPGL : CV (%)	26.9	Female Age Cut-off 1 CV 2 (%)	22.8	VEpidermis Thickness (µm) : Female	53.8	MPPI : Mean	2978	Surface Area Airway (m2): CV (%)	50	Gut : NP (%)	1.63	SI : Female (% of Qc)	11	CSF (% Brain volume) : Female	9.2	Additional Organ % of Body Weight	1	FcRn Concentration CV	5	% of total lymph flow (Spleen)	0	Target2 Kdeg (1/h)	0.012
Male Height C2	-0.0025	CPPGL : Baseline	28.8945	Female Age Cut-Off 2	78	VEpidermis Thickness CV(%) : Female	19	MPPI : CV	30	Surface Area Alveoli (m2): Mean	140	Heart : EW (%)	31.3	Villi : Male (% of Qc)	6	Spinal (% CSF) : Male	20	Additional Organ % of Body Weight CV (%)	30	Vinterstitial (L/kg)	0.16	% of total lymph flow (Additional Organ)	0	Target2 Kdeg CV	30
Male Height CV	3.9	CPPGL : Correlation Coefficient	1.31032	Female Age Cut-Off Baseline 3	79.5	VEpidermis Fat (%) : Male	3	CPPI : Mean	2342	Surface Area Alveoli (m2) : CV (%)	30	Heart : NL (%)	1.15	Villi : Female (% of Qc)	6	Spinal (% CSF) : Female	20	Additional Organ Density (g/L)	923	Vendothelial (fraction of tissuevolume)	0.005	Lymph flow rate (L/h/kg)	0.00169	Target2 Kshed (1/hr)	0
Female Body Weight C0	2.7383	CPPGL : CV (%)	21.467	Female Age Cut-Off 2 CV 1 (%)	38.3	VEpidermis Fat CV(%) : Male	30	CPPI : CV	31	Lobe Distribution Percentage (%) Ventillation rate RL	25.9	Heart : NP (%)	1.66	LI : Male (% of Qc)	4	Intracranial blood volume (% Brain Volume) : Male	5	Additional Organ Capillary Bed (%)	5	σv (Sigmav)	0.62	Lymph volume (L/kg)	0.00386	Target2 Kshed CV	30
Female Body Weight C1	0.0091	HPGL : Baseline	3.103	Female Age Cut-Off 2 CV 2 (%)	31.6	VEpidermis Fat (%) : Female	3	Use NEWE model for MBI and/or induction of gut CYPs	No	Lobe Distribution Percentage (%) Ventillation rate RM	12.4	Kidney : EW (%)	28.3	LI : Female (% of Qc)	5	Intracranial blood volume (% Brain Volume) : Female	5	For neutral (phospho)lipid Partitioning	Using Olive oil-water Partitioning	σl (Sigmal)	0.2	Lymph volume CV	30	Target2 Lambda (1/h)	0
Female Body Weight CV (%)	18.8	HPGL : Age Coefficient	-0.655	Prediction Method	Method 1	VEpidermis Fat CV(%) : Female	30	CYP2C9 EM Mean	12.9	Lobe Distribution Percentage (%) Ventillation rate RT	14.9	Kidney : NL (%)	2.07	Heart : Male (% of Qc)	4	Abundance: ABCB1 (P-gp) Mean	1			Kup (1/h)	0.0298	Total Plasma Protein (g/100ml)	6.85	Target3 Name	CD11a
Female Height C0	161.66	HPGL : CV (%)	41.9	Ref Value for Males 20~30	120	Upper arm		CYP2C9 EM CV	60	Lobe Distribution Percentage (%) Ventillation rate LL	32	Kidney : NP (%)	1.62	Heart : Female (% of Qc)	5	Abundance: ABCB1 (P-gp) CV (%)	0			Krc (1/h)	5.544	Total Plasma Protein CV	1.5	Target3 Rmax (µM)	0.01
Female Height C1	0.1319	P450/10e6 Cells : Baseline	3.034	Ref Value for Females 20~30	130	SCorneum Thickness (µm) : Male	11.9	CYP2C9 Mean Turnover Rate	0.03	Lobe Distribution Percentage (%) Ventillation rate LT	14.8	Liver : EW (%)	16.5	Kidney : Male (% of Qc)	19	Abundance: ABCC4 (MRP4) Mean	1			Krc,complex (1/h)	0.587			Target3 Rmax CV	10
Female Height C2	-0.0027	P450/10e6 Cells : HPGL Coefficient	-0.506	Age Limit	140	SCorneum Thickness CV(%) : Male	29	CV CYP2C9 Mean Turnover Rate	20	Lobe Distribution Percentage (%) Ventillation rate LA	100	Liver : NL (%)	2.48	Kidney : Female (% of Qc)	17	Abundance: ABCC4 (MRP4) CV (%)	0			FR	0.715			Target3 Kdeg (1/h)	0.0185
Female Height CV (%)	3.9	% Hepatic Bile Entering Gallbladder Mean	70.3	Kidney Size Baseline	15.4	SCorneum Thickness (µm) : Female	13.9	CYP2C9 PM Mean	3.8	Lobe Distribution Percentage (%) Ventillation rate UA	100	Liver : NP (%)	2.52	Liver (Art) : Male (% of Qc)	6.5	Abundance: ABCG2 (BCRP) Mean	1							Target3 Kdeg CV	10
Male Distribution	Weibull	% Hepatic Bile Entering Gallbladder CV (%)	32.1	Kidney Size BW Coeff	2.04	SCorneum Thickness CV(%) : Female	28	CYP2C9 PM Mean CV	60	Lobe Distribution Percentage (%) Blood Flow Rate RL	31	Lung : EW (%)	34.8	Liver (Art) : Female (% of Qc)	6.5	Abundance: ABCG2 (BCRP) CV (%)	0							Target3 Kshed (1/hr)	0
Alpha	2.1	IMMC Cycle Time Mean (h)	1.55	Kidney Size BH Coeff	51.8	SCorneum Fat (%) : Male	12.9	CYP2C9 UM Mean	0	Lobe Distribution Percentage (%) Blood Flow Rate RM	11.8	Lung : NL (%)	0.3	Liver (Port) : Male (% of Qc)	19	Abundance: Apical Influx (BBB) Mean	1							Target3 Kshed CV	30
Beta	24.7	IMMC Cycle Time CV (%)	55	Kidney Weight CV (%)	23.4	SCorneum Fat CV(%) : Male	47	CYP2C9 UM Mean CV	0	Lobe Distribution Percentage (%) Blood Flow Rate RT	8.7	Lung : NP (%)	0.9	Liver (Port) : Female (% of Qc)	21.5	Abundance: Apical Influx (BBB) CV (%)	0							Target3 Lambda (1/h)	0
Female Distribution	Weibull	Fasted Gallbladder Release Constant Mean (1/h)	0.18	Kidney Density	1050	SCorneum Fat (%) : Female	12.9	CYP2C9 IM Mean	0	Lobe Distribution Percentage (%) Blood Flow Rate LL	34.9	Muscle : EW (%)	9.1	Lung : Male (% of Qc)	100	Abundance: Apical Influx (BCSFB) Mean	1							Target4 Name	Target 4
Alpha	1.9	Fasted Gallbladder Release Constant CV (%)	30	PTCPGK Mean	60	SCorneum Fat CV(%) : Female	47	CYP2C9 IM Mean CV	0	Lobe Distribution Percentage (%) Blood Flow Rate LT	8.6	Muscle : NL (%)	2.38	Lung : Female (% of Qc)	100	Abundance: Apical Influx (BCSFB) CV (%)	0							Target4 Rmax (µM)	0
Beta	24.7	Fed Gallbladder Release Constant Mean (1/h)	0.48	PTCPGK CV (%)	30	VEpidermis Thickness (µm) : Male	37.1	CYP2C19 EM Mean	1.5	Lobe Distribution Percentage (%) Blood Flow Rate LA	5	Muscle : NP (%)	0.72	Muscle : Male (% of Qc)	17	Abundance: Apical Efflux (BCSFB) Mean	1							Target4 Rmax CV	30
Abundance : CYP1A2 PM Freq	0	Fed Gallbladder Release Constant CV (%)	19	MPPGK Mean	12.8	VEpidermis Thickness CV(%) : Male	51	CYP2C19 EM CV	60	Lobe Distribution Percentage (%) Blood Flow Rate UA	2.5	Pancreas : EW (%)	12	Muscle : Female (% of Qc)	12	Abundance: Apical Efflux (BCSFB) CV (%)	0							Target4 Kdeg (1/h)	0
Abundance : CYP1A2 UM Freq	0	Fasted Gallbladder Residual Volume Mean (%)	79.4	MPPGK CV (%)	55	VEpidermis Thickness (µm) : Female	45.7	CYP2C19 Mean Turnover Rate	0.03	Lobe Distribution Percentage (%) Alveoli Volume RL	26.3	Pancreas : NL (%)	4.1	Skin : Male (% of Qc)	5									Target4 Kdeg CV	30
Abundance : CYP1A2 IM Freq	0	Fasted Gallbladder Residual Volume CV (%)	13.1	CPPGK Mean	0	VEpidermis Thickness CV(%) : Female	62	CV CYP2C19 Mean Turnover Rate	20	Lobe Distribution Percentage (%) Alveoli Volume RM	10.5	Pancreas : NP (%)	0.93	Skin : Female (% of Qc)	5									Target4 Kshed (1/hr)	0
Abundance : CYP2A6 PM Freq	0	Fed Gallbladder Residual Volume Mean (%)	59.9	CPPGK CV (%)	30	VEpidermis Fat (%) : Male	3	CYP2C19 PM Mean	0	Lobe Distribution Percentage (%) Alveoli Volume RT	15.8	Skin : EW (%)	62.3	Spleen : Male (% of Qc)	2									Target4 Kshed CV	30
Abundance : CYP2A6 UM Freq	0	Fed Gallbladder Residual Volume CV (%)	39.6	S9 Method	Predicted	VEpidermis Fat CV(%) : Male	30	CYP2C19 PM Mean CV	0	Lobe Distribution Percentage (%) Alveoli Volume LL	26.3	Skin : NL (%)	2.84	Spleen : Female (% of Qc)	3									Target4 Lambda (1/h)	0
Abundance : CYP2A6 IM Freq	0	Enzyme Corr Switch	On	S9PPGK Mean	12.8	VEpidermis Fat (%) : Female	3	CYP2C19 UM Mean	0	Lobe Distribution Percentage (%) Alveoli Volume LT	21	Skin : NP (%)	1.11	Qmax	4									Target5 Name	Target 5
Abundance : CYP2B6 PM Freq	0.11	Enz Corr C0	62.775	UGT1A1 EM Mean	1	VEpidermis Fat CV(%) : Female	30	CYP2C19 UM Mean CV	0	Lobe Distribution Percentage (%) Alveoli Volume LA	50	Spleen : EW (%)	20.8	Qmax CV (%)	20									Target5 Rmax (µM)	0
Abundance : CYP2B6 UM Freq	0	Enz Corr C1	0.3934	UGT1A1 EM Mean CV (%)	50	Lower Leg		CYP2C19 IM Mean	0	Lobe Distribution Percentage (%) Alveoli Volume UA	50	Spleen : NL (%)	2.01	Cap on PV Blood Flow Fed/Fasted ratio	10									Target5 Rmax CV	30
Abundance : CYP2B6 IM Freq	0	Enz 2 Corr CV	24	UGT1A1 PM Mean	0.42	SCorneum Thickness (µm) : Male	16.8	CYP2C19 IM Mean CV	0	Lobe Distribution Percentage (%) Absorption Area RL	26.3	Spleen : NP (%)	1.98											Target5 Kdeg (1/h)	0
Abundance : CYP2C8 PM Freq	0	Abundance : CYP1A2 EM Mean	52	UGT1A1 PM Mean CV (%)	50	SCorneum Thickness CV(%) : Male	52	CYP2D6 EM Mean	0.8	Lobe Distribution Percentage (%) Absorption Area RM	10.5	Plasma : EW (%)	94.5											Target5 Kdeg CV	30
Abundance : CYP2C8 UM Freq	0	Abundance : CYP1A2 EM CV (%)	67	UGT1A1 UM Mean	1.46	SCorneum Thickness (µm) : Female	13.9	CYP2D6 EM CV	60	Lobe Distribution Percentage (%) Absorption Area RT	15.8	Plasma : NL (%)	0.35											Target5 Kshed (1/hr)	0
Abundance : CYP2C8 IM Freq	0	Abundance : CYP1A2 PM Mean	0	UGT1A1 UM Mean CV (%)	50	SCorneum Thickness CV(%) : Female	43	CYP2D6 Mean Turnover Rate	0.03	Lobe Distribution Percentage (%) Absorption Area LL	26.3	Plasma : NP (%)	0.22											Target5 Kshed CV	30
Abundance : CYP2C9 PM Freq	0.06	Abundance : CYP1A2 PM CV (%)	0	UGT1A1 IM Mean	0.72	SCorneum Fat (%) : Male	4.7	CV CYP2D6 Mean Turnover Rate	20	Lobe Distribution Percentage (%) Absorption Area LT	21	RBC : EW (%)	0											Target5 Lambda (1/h)	0
Abundance : CYP2C9 UM Freq	0	Abundance : CYP1A2 UM Mean	0	UGT1A1 IM Mean CV (%)	50	SCorneum Fat CV(%) : Male	62	CYP2D6 PM Mean	0	Lobe Distribution Percentage (%) Absorption Area LA	50	RBC : NL (%)	0.17											Target6 Name	Target 6
Abundance : CYP2C9 IM Freq	0	Abundance : CYP1A2 UM CV (%)	0	UGT1A1 Absolute Abundance	6.1	SCorneum Fat (%) : Female	4.7	CYP2D6 PM Mean CV	0	Lobe Distribution Percentage (%) Absorption Area UA	50	RBC : NP (%)	0.29											Target6 Rmax (µM)	0
Abundance : CYP2C18 PM Freq	0	Abundance : CYP1A2 IM Mean	0	UGT1A3 EM Mean	1	SCorneum Fat CV(%) : Female	62	CYP2D6 UM Mean	1.6	Lobe Distribution Percentage (%) Pulmonary Capilliary Blood Volume RL	16.66	Adipose : IW (%)	3.9											Target6 Rmax CV	30
Abundance : CYP2C18 UM Freq	0	Abundance : CYP1A2 IM CV (%)	0	UGT1A3 EM Mean CV (%)	50	VEpidermis Thickness (µm) : Male	63.4	CYP2D6 UM Mean CV	60	Lobe Distribution Percentage (%) Pulmonary Capilliary Blood Volume RM	16.67	Adipose : AP (mg/g)	0.4											Target6 Kdeg (1/h)	0
Abundance : CYP2C18 IM Freq	0	Turnover rate : CYP1A2 Mean	0.0183	UGT1A3 PM Mean	0	VEpidermis Thickness CV(%) : Male	32	CYP2D6 IM Mean	0	Lobe Distribution Percentage (%) Pulmonary Capilliary Blood Volume RT	16.67	Adipose : KpALB	0.151											Target6 Kdeg CV	30
Abundance : CYP2C19 PM Freq	0.024	Turnover rate : CYP1A2 CV (%)	56	UGT1A3 PM Mean CV (%)	0	VEpidermis Thickness (µm) : Female	74.9	CYP2D6 IM Mean CV	0	Lobe Distribution Percentage (%) Pulmonary Capilliary Blood Volume LL	16.67	Adipose : KpLPP	0.068											Target6 Kshed (1/hr)	0
Abundance : CYP2C19 UM Freq	0	Abundance : CYP2A6 EM Mean	20	UGT1A3 UM Mean	0	VEpidermis Thickness CV(%) : Female	19	CYP2J2 EM Mean	1.4	Lobe Distribution Percentage (%) Pulmonary Capilliary Blood Volume LT	16.67	Bone : IW (%)	34.1											Target6 Kshed CV	30
Abundance : CYP2C19 IM Freq	0	Abundance : CYP2A6 EM CV (%)	173	UGT1A3 UM Mean CV (%)	0	VEpidermis Fat (%) : Male	3	CYP2J2 EM CV	60	Lobe Distribution Percentage (%) Pulmonary Capilliary Blood Volume LA	8.33	Bone : AP (mg/g)	0.67											Target6 Lambda (1/h)	0
Abundance : CYP2D6 PM Freq	0	Abundance : CYP2A6 PM Mean	0	UGT1A3 IM Mean	0	VEpidermis Fat CV(%) : Male	30	CYP2J2 Mean Turnover Rate	0.03	Lobe Distribution Percentage (%) Pulmonary Capilliary Blood Volume UA	8.33	Bone : KpALB	0.1											Target7 Name	Target 7
Abundance : CYP2D6 UM Freq	0	Abundance : CYP2A6 PM CV (%)	0	UGT1A3 IM Mean CV (%)	0	VEpidermis Fat (%) : Female	3	CV CYP2J2 Mean Turnover Rate	20	Lobe Distribution Percentage (%) Pulmonary Mass Volume RL	16.66	Bone : KpLPP	0.05											Target7 Rmax (µM)	0
Abundance : CYP2D6 IM Freq	0	Abundance : CYP2A6 UM Mean	0	UGT1A3 Absolute Abundance	0	VEpidermis Fat CV(%) : Female	30	CYP2J2 PM Mean	0	Lobe Distribution Percentage (%) Pulmonary Mass Volume RM	16.67	Brain : IW (%)	67.8											Target7 Rmax CV	30
Abundance : CYP2E1 PM Freq	0	Abundance : CYP2A6 UM CV (%)	0	UGT1A4 EM Mean	1	Thigh		CYP2J2 PM Mean CV	0	Lobe Distribution Percentage (%) Pulmonary Mass Volume RT	16.67	Brain : AP (mg/g)	0.4											Target7 Kdeg (1/h)	0
Abundance : CYP2E1 UM Freq	0	Abundance : CYP2A6 IM Mean	0	UGT1A4 EM Mean CV (%)	50	SCorneum Thickness (µm) : Male	11	CYP2J2 UM Mean	0	Lobe Distribution Percentage (%) Pulmonary Mass Volume LL	16.67	Brain : KpALB	0.048											Target7 Kdeg CV	30
Abundance : CYP2E1 IM Freq	0	Abundance : CYP2A6 IM CV (%)	0	UGT1A4 PM Mean	0	SCorneum Thickness CV(%) : Male	32	CYP2J2 UM Mean CV	0	Lobe Distribution Percentage (%) Pulmonary Mass Volume LT	16.67	Brain : KpLPP	0.041											Target7 Kshed (1/hr)	0
Abundance : CYP2J2 PM Freq	0	Turnover rate : CYP2A6 Mean	0.0267	UGT1A4 PM Mean CV (%)	0	SCorneum Thickness (µm) : Female	11	CYP2J2 IM Mean	0	Lobe Distribution Percentage (%) Pulmonary Mass Volume LA	8.33	Gut : IW (%)	45.1											Target7 Kshed CV	30
Abundance : CYP2J2 UM Freq	0	Turnover rate : CYP2A6 CV (%)	56	UGT1A4 UM Mean	0	SCorneum Thickness CV(%) : Female	20	CYP2J2 IM Mean CV	0	Lobe Distribution Percentage (%) Pulmonary Mass Volume UA	8.33	Gut : AP (mg/g)	2.84											Target7 Lambda (1/h)	0
Abundance : CYP2J2 IM Freq	0	Abundance : CYP2B6 EM Mean	17	UGT1A4 UM Mean CV (%)	0	SCorneum Fat (%) : Male	23.7	CYP3A4 EM Mean	66.2	Lobe Distribution Percentage (%) Epithelial Lining Fluid Volume RL	16.66	Gut : KpALB	0.158											Target8 Name	Target 8
Abundance : CYP3A4 PM Freq	0	Abundance : CYP2B6 EM CV (%)	122	UGT1A4 IM Mean	0	SCorneum Fat CV(%) : Male	24	CYP3A4 EM CV	60	Lobe Distribution Percentage (%) Epithelial Lining Fluid Volume RM	16.67	Gut : KpLPP	0.141											Target8 Rmax (µM)	0
Abundance : CYP3A4 UM Freq	0	Abundance : CYP2B6 PM Mean	6	UGT1A4 IM Mean CV (%)	0	SCorneum Fat (%) : Female	23.7	CYP3A4 Mean Turnover Rate	0.03	Lobe Distribution Percentage (%) Epithelial Lining Fluid Volume RT	16.67	Heart : IW (%)	44.5											Target8 Rmax CV	30
Abundance : CYP3A4 IM Freq	0	Abundance : CYP2B6 PM CV (%)	200	UGT1A4 Absolute Abundance	8.7	SCorneum Fat CV(%) : Female	24	CV CYP3A4 Mean Turnover Rate	20	Lobe Distribution Percentage (%) Epithelial Lining Fluid Volume LL	16.67	Heart : AP (mg/g)	3.07											Target8 Kdeg (1/h)	0
Abundance : CYP3A5 PM Freq	0.83	Abundance : CYP2B6 UM Mean	0	UGT1A5 EM Mean	1	VEpidermis Thickness (µm) : Male	53.3	CYP3A4 PM Mean	0	Lobe Distribution Percentage (%) Epithelial Lining Fluid Volume LT	16.67	Heart : KpALB	0.157											Target8 Kdeg CV	30
Abundance : CYP3A5 UM Freq	0	Abundance : CYP2B6 UM CV (%)	0	UGT1A5 EM Mean CV (%)	50	VEpidermis Thickness CV(%) : Male	40	CYP3A4 PM Mean CV	0	Lobe Distribution Percentage (%) Epithelial Lining Fluid Volume LA	8.33	Heart : KpLPP	0.16											Target8 Kshed (1/hr)	0
Abundance : CYP3A5 IM Freq	0	Abundance : CYP2B6 IM Mean	0	UGT1A5 PM Mean	0	VEpidermis Thickness (µm) : Female	43.3	CYP3A4 UM Mean	0	Lobe Distribution Percentage (%) Epithelial Lining Fluid Volume UA	8.33	Kidney : IW (%)	50											Target8 Kshed CV	30
Abundance : CYP3A7 PM Freq	0.88	Abundance : CYP2B6 IM CV (%)	0	UGT1A5 PM Mean CV (%)	0	VEpidermis Thickness CV(%) : Female	40	CYP3A4 UM Mean CV	0	Use local pH by segment	No	Kidney : AP (mg/g)	2.48											Target8 Lambda (1/h)	0
Abundance : CYP3A7 UM Freq	0	Turnover rate : CYP2B6 Mean	0.0217	UGT1A5 UM Mean	0	VEpidermis Fat (%) : Male	3	CYP3A4 IM Mean	0	Basal Influx1 (Lung) Mean	1	Kidney : KpALB	0.13											Target9 Name	Target 9
Abundance : CYP3A7 IM Freq	0	Turnover rate : CYP2B6 CV (%)	56	UGT1A5 UM Mean CV (%)	0	VEpidermis Fat CV(%) : Male	30	CYP3A4 IM Mean CV	0	Basal Influx1 (Lung) CV (%)	0	Kidney : KpLPP	0.137											Target9 Rmax (µM)	0
Abundance : CYP2C9 Freq	0.672	Abundance : CYP2C8 EM Mean	24	UGT1A5 IM Mean	0	VEpidermis Fat (%) : Female	3	CYP3A5 EM Mean	24.6	Basal Influx2 (Lung) Mean	1	Liver : IW (%)	58.6											Target9 Rmax CV	30
Abundance : CYP2C9 Freq	0.186	Abundance : CYP2C8 EM CV (%)	81	UGT1A5 IM Mean CV (%)	0	VEpidermis Fat CV(%) : Female	30	CYP3A5 EM CV	60	Basal Influx2 (Lung) CV (%)	0	Liver : AP (mg/g)	5.09											Target9 Kdeg (1/h)	0
Abundance : CYP2C9 Freq	0.111	Abundance : CYP2C8 PM Mean	0	UGT1A5 Absolute Abundance	0	Face		CYP3A5 Mean Turnover Rate	0.03	Basal Efflux1 (Lung) Mean	1	Liver : KpALB	0.086											Target9 Kdeg CV	30
Abundance : CYP2C9 Freq	0.011	Abundance : CYP2C8 PM CV (%)	0	UGT1A6 EM Mean	1	SCorneum Thickness (µm) : Male	14.3	CV CYP3A5 Mean Turnover Rate	20	Basal Efflux1 (Lung) CV (%)	0	Liver : KpLPP	0.161											Target9 Kshed (1/hr)	0
Abundance : CYP2C9 Freq	0.017	Abundance : CYP2C8 UM Mean	0	UGT1A6 EM Mean CV (%)	50	SCorneum Thickness CV(%) : Male	23	CYP3A5 PM Mean	0	Basal Efflux2 (Lung) Mean	1	Lung : IW (%)	46.3											Target9 Kshed CV	30
Abundance : CYP2C9 Freq	0.003	Abundance : CYP2C8 UM CV (%)	0	UGT1A6 PM Mean	0	SCorneum Thickness (µm) : Female	15.6	CYP3A5 PM Mean CV	0	Basal Efflux2 (Lung) CV (%)	0	Lung : AP (mg/g)	0.5											Target9 Lambda (1/h)	0
Abundance : UGT1A1 PM Freq	0.11	Abundance : CYP2C8 IM Mean	0	UGT1A6 PM Mean CV (%)	0	SCorneum Thickness CV(%) : Female	21	CYP3A5 UM Mean	0	Apical Influx1 (Lung) Mean	1	Lung : KpALB	0.212											Target10 Name	Target 10
Abundance : UGT1A1 UM Freq	0.01	Abundance : CYP2C8 IM CV (%)	0	UGT1A6 UM Mean	0	SCorneum Fat (%) : Male	7.2	CYP3A5 UM Mean CV	0	Apical Influx1 (Lung) CV (%)	0	Lung : KpLPP	0.168											Target10 Rmax (µM)	0
Abundance : UGT1A1 IM Freq	0.44	Turnover rate : CYP2C8 Mean	0.0301	UGT1A6 UM Mean CV (%)	0	SCorneum Fat CV(%) : Male	12	CYP3A5 IM Mean	0	Apical Influx2 (Lung) Mean	1	Muscle : IW (%)	66.9											Target10 Rmax CV	30
Abundance : UGT1A3 PM Freq	0	Turnover rate : CYP2C8 CV (%)	56	UGT1A6 IM Mean	0	SCorneum Fat (%) : Female	7.2	CYP3A5 IM Mean CV	0	Apical Influx2 (Lung) CV (%)	0	Muscle : AP (mg/g)	2.49											Target10 Kdeg (1/h)	0
Abundance : UGT1A3 UM Freq	0	Abundance : CYP2C9 EM Mean	73	UGT1A6 IM Mean CV (%)	0	SCorneum Fat CV(%) : Female	12	UGT1A1 EM Mean	1	Apical Efflux1 (Lung) Mean	1	Muscle : KpALB	0.271											Target10 Kdeg CV	30
Abundance : UGT1A3 IM Freq	0	Abundance : CYP2C9 EM CV (%)	54	UGT1A6 Absolute Abundance	3.6	VEpidermis Thickness (µm) : Male	38.9	UGT1A1 EM Mean CV (%)	60	Apical Efflux1 (Lung) CV (%)	0	Muscle : KpLPP	0.059											Target10 Kshed (1/hr)	0
Abundance : UGT1A4 PM Freq	0.13	Abundance : CYP2C9 PM Mean	29	UGT1A7 EM Mean	1	VEpidermis Thickness CV(%) : Male	50	UGT1A1 PM Mean	0.4	Apical Efflux2 (Lung) Mean	1	Skin : IW (%)	9.47											Target10 Kshed CV	30
Abundance : UGT1A4 UM Freq	0	Abundance : CYP2C9 PM CV (%)	73	UGT1A7 EM Mean CV (%)	50	VEpidermis Thickness (µm) : Female	37.4	UGT1A1 PM Mean CV (%)	60	Apical Efflux2 (Lung) CV (%)	0	Skin : AP (mg/g)	1.32											Target10 Lambda (1/h)	0
Abundance : UGT1A4 IM Freq	0	Abundance : CYP2C9 UM Mean	0	UGT1A7 PM Mean	0	VEpidermis Thickness CV(%) : Female	21	UGT1A1 UM Mean	0			Skin : KpALB	0.277											Target11 Name	Target 11
Abundance : UGT1A5 PM Freq	0	Abundance : CYP2C9 UM CV (%)	0	UGT1A7 PM Mean CV (%)	0	VEpidermis Fat (%) : Male	3	UGT1A1 UM Mean CV (%)	0			Skin : KpLPP	0.096											Target11 Rmax (µM)	0
Abundance : UGT1A5 UM Freq	0	Abundance : CYP2C9 IM Mean	0	UGT1A7 UM Mean	0	VEpidermis Fat CV(%) : Male	30	UGT1A1 IM Mean	0.83			Spleen : IW (%)	57.9											Target11 Rmax CV	30
Abundance : UGT1A5 IM Freq	0	Abundance : CYP2C9 IM CV (%)	0	UGT1A7 UM Mean CV (%)	0	VEpidermis Fat (%) : Female	3	UGT1A1 IM Mean CV (%)	0			Spleen : AP (mg/g)	2.81											Target11 Kdeg (1/h)	0
Abundance : UGT1A6 PM Freq	0	Turnover rate : CYP2C9 Mean	0.0067	UGT1A7 IM Mean	0	VEpidermis Fat CV(%) : Female	30	UGT1A1 Absolute Abundance	8.5			Spleen : KpALB	0.097											Target11 Kdeg CV	30
Abundance : UGT1A6 UM Freq	0	Turnover rate : CYP2C9 CV (%)	56	UGT1A7 IM Mean CV (%)	0			UGT1A3 EM Mean	1			Spleen : KpLPP	0.207											Target11 Kshed (1/hr)	0
Abundance : UGT1A6 IM Freq	0	Abundance : CYP2C18 EM Mean	1	UGT1A7 Absolute Abundance	13			UGT1A3 EM Mean CV (%)	60			Plasma : IW (%)	0											Target11 Kshed CV	30
Abundance : UGT1A7 PM Freq	0	Abundance : CYP2C18 EM CV (%)	106	UGT1A8 EM Mean	1			UGT1A3 PM Mean	0			Plasma : AP (mg/g)	0.04											Target11 Lambda (1/h)	0
Abundance : UGT1A7 UM Freq	0	Abundance : CYP2C18 PM Mean	0	UGT1A8 EM Mean CV (%)	50			UGT1A3 PM Mean CV (%)	0			RBC : IW (%)	66.6											Target12 Name	Target 12
Abundance : UGT1A7 IM Freq	0	Abundance : CYP2C18 PM CV (%)	0	UGT1A8 PM Mean	0			UGT1A3 UM Mean	0			RBC : AP (mg/g)	0.44											Target12 Rmax (µM)	0
Abundance : UGT1A8 PM Freq	0	Abundance : CYP2C18 UM Mean	0	UGT1A8 PM Mean CV (%)	0			UGT1A3 UM Mean CV (%)	0			Pancreas : IW (%)	66.4											Target12 Rmax CV	30
Abundance : UGT1A8 UM Freq	0	Abundance : CYP2C18 UM CV (%)	0	UGT1A8 UM Mean	0			UGT1A3 IM Mean	0			Pancreas : AP (mg/g)	1.67											Target12 Kdeg (1/h)	0
Abundance : UGT1A8 IM Freq	0	Abundance : CYP2C18 IM Mean	0	UGT1A8 UM Mean CV (%)	0			UGT1A3 IM Mean CV (%)	0			Pancreas : KpALB	0.06											Target12 Kdeg CV	30
Abundance : UGT1A9 PM Freq	0	Abundance : CYP2C18 IM CV (%)	0	UGT1A8 IM Mean	0			UGT1A3 Absolute Abundance	0.4			Pancreas : KpLPP	0.06											Target12 Kshed (1/hr)	0
Abundance : UGT1A9 UM Freq	0	Turnover rate : CYP2C18 Mean	0.0267	UGT1A8 IM Mean CV (%)	0			UGT1A4 EM Mean	1			Adipose volume scalar	1											Target12 Kshed CV	30
Abundance : UGT1A9 IM Freq	0	Turnover rate : CYP2C18 CV (%)	56	UGT1A8 Absolute Abundance	4.9			UGT1A4 EM Mean CV (%)	60			Bone volume scalar	1											Target12 Lambda (1/h)	0
Abundance : UGT1A10 PM Freq	0	Abundance : CYP2C19 EM Mean	14	UGT1A9 EM Mean	1			UGT1A4 PM Mean	0.7			Brain volume scalar	1											Target13 Name	Target 13
Abundance : UGT1A10 UM Freq	0	Abundance : CYP2C19 EM CV (%)	40	UGT1A9 EM Mean CV (%)	50			UGT1A4 PM Mean CV (%)	60			Gut volume scalar	1											Target13 Rmax (µM)	0
Abundance : UGT1A10 IM Freq	0	Abundance : CYP2C19 PM Mean	0	UGT1A9 PM Mean	0			UGT1A4 UM Mean	0			Heart volume scalar	1											Target13 Rmax CV	30
Abundance : UGT2B4 PM Freq	0	Abundance : CYP2C19 PM CV (%)	0	UGT1A9 PM Mean CV (%)	0			UGT1A4 UM Mean CV (%)	0			Kidney volume scalar	1											Target13 Kdeg (1/h)	0
Abundance : UGT2B4 UM Freq	0	Abundance : CYP2C19 UM Mean	0	UGT1A9 UM Mean	0			UGT1A4 IM Mean	0			Liver volume scalar	1											Target13 Kdeg CV	30
Abundance : UGT2B4 IM Freq	0	Abundance : CYP2C19 UM CV (%)	0	UGT1A9 UM Mean CV (%)	0			UGT1A4 IM Mean CV (%)	0			Lung volume scalar	1											Target13 Kshed (1/hr)	0
Abundance : UGT2B7 PM Freq	0	Abundance : CYP2C19 IM Mean	0	UGT1A9 IM Mean	0			UGT1A4 Absolute Abundance	1.9			Muscle volume scalar	1											Target13 Kshed CV	30
Abundance : UGT2B7 UM Freq	0	Abundance : CYP2C19 IM CV (%)	0	UGT1A9 IM Mean CV (%)	0			UGT1A5 EM Mean	1			Skin volume scalar	1											Target13 Lambda (1/h)	0
Abundance : UGT2B7 IM Freq	0	Turnover rate : CYP2C19 Mean	0.0267	UGT1A9 Absolute Abundance	79			UGT1A5 EM Mean CV (%)	60			Spleen volume scalar	1											Target14 Name	Target 14
Abundance : UGT2B10 PM Freq	0	Turnover rate : CYP2C19 CV (%)	56	UGT1A10 EM Mean	1			UGT1A5 PM Mean	0			Plasma volume scalar	1											Target14 Rmax (µM)	0
Abundance : UGT2B10 UM Freq	0	Abundance : CYP2D6 EM Mean	8	UGT1A10 EM Mean CV (%)	50			UGT1A5 PM Mean CV (%)	0			RBC volume scalar	1											Target14 Rmax CV	30
Abundance : UGT2B10 IM Freq	0	Abundance : CYP2D6 EM CV (%)	61	UGT1A10 PM Mean	0			UGT1A5 UM Mean	0			Local pH : Plasma	7.4											Target14 Kdeg (1/h)	0
Abundance : UGT2B11 PM Freq	0	Abundance : CYP2D6 PM Mean	0	UGT1A10 PM Mean CV (%)	0			UGT1A5 UM Mean CV (%)	0			Local pH : EW	7.4											Target14 Kdeg CV	30
Abundance : UGT2B11 UM Freq	0	Abundance : CYP2D6 PM CV (%)	0	UGT1A10 UM Mean	0			UGT1A5 IM Mean	0			Local pH : IW	7											Target14 Kshed (1/hr)	0
Abundance : UGT2B11 IM Freq	0	Abundance : CYP2D6 UM Mean	16	UGT1A10 UM Mean CV (%)	0			UGT1A5 IM Mean CV (%)	0			Local pH : IWBC	7.22											Target14 Kshed CV	30
Abundance : UGT2B15 PM Freq	0.28	Abundance : CYP2D6 UM CV (%)	61	UGT1A10 IM Mean	0			UGT1A5 Absolute Abundance	0.3			Local pH : Brain Mass	7.12											Target14 Lambda (1/h)	0
Abundance : UGT2B15 UM Freq	0	Abundance : CYP2D6 IM Mean	0	UGT1A10 IM Mean CV (%)	0			UGT1A6 EM Mean	1			Local pH : CSF	7.31											Target15 Name	Target 15
Abundance : UGT2B15 IM Freq	0.51	Abundance : CYP2D6 IM CV (%)	0	UGT1A10 Absolute Abundance	17			UGT1A6 EM Mean CV (%)	60			Local pH : Renal Cells	7.2											Target15 Rmax (µM)	0
Abundance : UGT2B17 PM Freq	0.09	Turnover rate : CYP2D6 Mean	0.0099	UGT2B4 EM Mean	1			UGT1A6 PM Mean	0			Local pH : Pulmonary Fluid	6.6											Target15 Rmax CV	30
Abundance : UGT2B17 UM Freq	0	Turnover rate : CYP2D6 CV (%)	56	UGT2B4 EM Mean CV (%)	50			UGT1A6 PM Mean CV (%)	0			Local pH : Pulmonary Mass	6.7											Target15 Kdeg (1/h)	0
Abundance : UGT2B17 IM Freq	0.36	Abundance : CYP2E1 EM Mean	61	UGT2B4 PM Mean	0			UGT1A6 UM Mean	0			Haematocrit Mean : Male	43											Target15 Kdeg CV	30
Abundance : UGT2B28 PM Freq	0	Abundance : CYP2E1 EM CV (%)	61	UGT2B4 PM Mean CV (%)	0			UGT1A6 UM Mean CV (%)	0			Haematocrit CV (%) (%) : Male	6.5											Target15 Kshed (1/hr)	0
Abundance : UGT2B28 UM Freq	0	Abundance : CYP2E1 PM Mean	0	UGT2B4 UM Mean	0			UGT1A6 IM Mean	0			Haematocrit Mean : Female	38											Target15 Kshed CV	30
Abundance : UGT2B28 IM Freq	0	Abundance : CYP2E1 PM CV (%)	0	UGT2B4 UM Mean CV (%)	0			UGT1A6 IM Mean CV (%)	0			Haematocrit CV (%) (%) : Female	7.1											Target15 Lambda (1/h)	0
Abundance : User UGT1 PM Freq	0	Abundance : CYP2E1 UM Mean	0	UGT2B4 IM Mean	0			UGT1A6 Absolute Abundance	1.3			AGP Mean : Male	0.811											Target16 Name	Target 16
Abundance : User UGT1 UM Freq	0	Abundance : CYP2E1 UM CV (%)	0	UGT2B4 IM Mean CV (%)	0			UGT1A7 EM Mean	1			AGP CV (%) (%) : Male	15											Target16 Rmax (µM)	0
Abundance : User UGT1 IM Freq	0	Abundance : CYP2E1 IM Mean	0	UGT2B4 Absolute Abundance	0.3			UGT1A7 EM Mean CV (%)	60			AGP Mean : Female	0.791											Target16 Rmax CV	30
Abundance : User Cyt1 PM Freq	0	Abundance : CYP2E1 IM CV (%)	0	UGT2B7 EM Mean	1			UGT1A7 PM Mean	0			AGP CV (%) (%) : Female	13											Target16 Kdeg (1/h)	0
Abundance : User Cyt1 UM Freq	0	Turnover rate : CYP2E1 Mean	0.0176	UGT2B7 EM Mean CV (%)	50			UGT1A7 PM Mean CV (%)	0			HSA C0 : Male	50.34											Target16 Kdeg CV	30
Abundance : User Cyt1 IM Freq	0	Turnover rate : CYP2E1 CV (%)	63	UGT2B7 PM Mean	0			UGT1A7 UM Mean	0			HSA C1 : Male	-0.0575											Target16 Kshed (1/hr)	0
Abundance : User Cyt2 PM Freq	0	Abundance : CYP2J2 EM Mean	1.2	UGT2B7 PM Mean CV (%)	0			UGT1A7 UM Mean CV (%)	0			HSA C2 : Male	-0.0738											Target16 Kshed CV	30
Abundance : User Cyt2 UM Freq	0	Abundance : CYP2J2 EM CV (%)	175	UGT2B7 UM Mean	0			UGT1A7 IM Mean	0			HSA CV (%) : Male	10											Target16 Lambda (1/h)	0
Abundance : User Cyt2 IM Freq	0	Abundance : CYP2J2 PM Mean	0	UGT2B7 UM Mean CV (%)	0			UGT1A7 IM Mean CV (%)	0			HSA C0 : Female	49.38											Target17 Name	Target 17
Abundance : User Cyt3 PM Freq	0	Abundance : CYP2J2 PM CV (%)	0	UGT2B7 IM Mean	0			UGT1A7 Absolute Abundance	7.1			HSA C1 : Female	-0.037											Target17 Rmax (µM)	0
Abundance : User Cyt3 UM Freq	0	Abundance : CYP2J2 UM Mean	0	UGT2B7 IM Mean CV (%)	0			UGT1A8 EM Mean	1			HSA C2 : Female	-0.1286											Target17 Rmax CV	30
Abundance : User Cyt3 IM Freq	0	Abundance : CYP2J2 UM CV (%)	0	UGT2B7 Absolute Abundance	48			UGT1A8 EM Mean CV (%)	60			HSA CV (%) : Female	10											Target17 Kdeg (1/h)	0
Abundance : User Cyt4 PM Freq	0	Abundance : CYP2J2 IM Mean	0	UGT2B10 EM Mean	1			UGT1A8 PM Mean	0			Other Mean : Male	0											Target17 Kdeg CV	30
Abundance : User Cyt4 UM Freq	0	Abundance : CYP2J2 IM CV (%)	0	UGT2B10 EM Mean CV (%)	50			UGT1A8 PM Mean CV (%)	0			Other CV (%)(%) : Male	0											Target17 Kshed (1/hr)	0
Abundance : User Cyt4 IM Freq	0	Turnover rate : CYP2J2 Mean	0.0194	UGT2B10 PM Mean	0			UGT1A8 UM Mean	0			Other Mean : Female	0											Target17 Kshed CV	30
Abundance: ABCB1 (P-gp) PT Freq	0	Turnover rate : CYP2J2 CV (%)	56	UGT2B10 PM Mean CV (%)	0			UGT1A8 UM Mean CV (%)	0			Other CV (%)(%) : Female	0											Target17 Lambda (1/h)	0
Abundance: ABCB1 (P-gp) IT Freq	0	Abundance : CYP3A4 EM Mean	137	UGT2B10 UM Mean	0			UGT1A8 IM Mean	0			User-defined Binding Type	User-defined											Target18 Name	Target 18
Abundance: ABCB1 (P-gp) UT Freq	0	Abundance : CYP3A4 EM CV (%)	41	UGT2B10 UM Mean CV (%)	0			UGT1A8 IM Mean CV (%)	0															Target18 Rmax (µM)	0
Abundance: ABCC2 (MRP2) PT Freq	0	Abundance : CYP3A4 PM Mean	0	UGT2B10 IM Mean	0			UGT1A8 Absolute Abundance	5.6															Target18 Rmax CV	30
Abundance: ABCC2 (MRP2) IT Freq	0	Abundance : CYP3A4 PM CV (%)	0	UGT2B10 IM Mean CV (%)	0			UGT1A9 EM Mean	1															Target18 Kdeg (1/h)	0
Abundance: ABCC2 (MRP2) UT Freq	0	Abundance : CYP3A4 UM Mean	0	UGT2B10 Absolute Abundance	0			UGT1A9 EM Mean CV (%)	60															Target18 Kdeg CV	30
Abundance: ABCC3 (MRP3) PT Freq	0	Abundance : CYP3A4 UM CV (%)	0	UGT2B11 EM Mean	1			UGT1A9 PM Mean	0															Target18 Kshed (1/hr)	0
Abundance: ABCC3 (MRP3) IT Freq	0	Abundance : CYP3A4 IM Mean	0	UGT2B11 EM Mean CV (%)	50			UGT1A9 PM Mean CV (%)	0															Target18 Kshed CV	30
Abundance: ABCC3 (MRP3) UT Freq	0	Abundance : CYP3A4 IM CV (%)	0	UGT2B11 PM Mean	0			UGT1A9 UM Mean	0															Target18 Lambda (1/h)	0
Abundance: ABCC4 (MRP4) PT Freq	0	Turnover rate : CYP3A4 Mean	0.0193	UGT2B11 PM Mean CV (%)	0			UGT1A9 UM Mean CV (%)	0															Target19 Name	Target 19
Abundance: ABCC4 (MRP4) IT Freq	0	Turnover rate : CYP3A4 CV (%)	68	UGT2B11 UM Mean	0			UGT1A9 IM Mean	0															Target19 Rmax (µM)	0
Abundance: ABCC4 (MRP4) UT Freq	0	Abundance : CYP3A5 EM Mean	103	UGT2B11 UM Mean CV (%)	0			UGT1A9 IM Mean CV (%)	0															Target19 Rmax CV	30
Abundance: ABCG2 (BCRP) PT Freq	0	Abundance : CYP3A5 EM CV (%)	65	UGT2B11 IM Mean	0			UGT1A9 Absolute Abundance	5.9															Target19 Kdeg (1/h)	0
Abundance: ABCG2 (BCRP) IT Freq	0	Abundance : CYP3A5 PM Mean	0	UGT2B11 IM Mean CV (%)	0			UGT1A10 EM Mean	1															Target19 Kdeg CV	30
Abundance: ABCG2 (BCRP) UT Freq	0	Abundance : CYP3A5 PM CV (%)	0	UGT2B11 Absolute Abundance	0			UGT1A10 EM Mean CV (%)	60															Target19 Kshed (1/hr)	0
Abundance: SLCO1B1 (OATP1B1) PT Freq	0.02	Abundance : CYP3A5 UM Mean	0	UGT2B15 EM Mean	1			UGT1A10 PM Mean	0															Target19 Kshed CV	30
Abundance: SLCO1B1 (OATP1B1) IT Freq	0.27	Abundance : CYP3A5 UM CV (%)	0	UGT2B15 EM Mean CV (%)	50			UGT1A10 PM Mean CV (%)	0															Target19 Lambda (1/h)	0
Abundance: SLCO1B1 (OATP1B1) UT Freq	0.07	Abundance : CYP3A5 IM Mean	0	UGT2B15 PM Mean	0.07			UGT1A10 UM Mean	0															Target20 Name	Target 20
Abundance: SLCO1B3 (OATP1B3) PT Freq	0	Abundance : CYP3A5 IM CV (%)	0	UGT2B15 PM Mean CV (%)	50			UGT1A10 UM Mean CV (%)	0															Target20 Rmax (µM)	0
Abundance: SLCO1B3 (OATP1B3) IT Freq	0	Turnover rate : CYP3A5 Mean	0.0193	UGT2B15 UM Mean	0			UGT1A10 IM Mean	0															Target20 Rmax CV	30
Abundance: SLCO1B3 (OATP1B3) UT Freq	0	Turnover rate : CYP3A5 CV (%)	68	UGT2B15 UM Mean CV (%)	0			UGT1A10 IM Mean CV (%)	0															Target20 Kdeg (1/h)	0
Abundance: SLC22A1 (OCT1) PT Freq	0	Abundance : CYP3A7 EM Mean	35.4	UGT2B15 IM Mean	0.47			UGT1A10 Absolute Abundance	4.3															Target20 Kdeg CV	30
Abundance: SLC22A1 (OCT1) IT Freq	0	Abundance : CYP3A7 EM CV (%)	61	UGT2B15 IM Mean CV (%)	50			UGT2B4 EM Mean	1															Target20 Kshed (1/hr)	0
Abundance: SLC22A1 (OCT1) UT Freq	0	Abundance : CYP3A7 PM Mean	0	UGT2B15 Absolute Abundance	0.2			UGT2B4 EM Mean CV (%)	60															Target20 Kshed CV	30
Abundance: SLC22A2 (OCT2) PT Freq	0	Abundance : CYP3A7 PM CV (%)	0	UGT2B17 EM Mean	1			UGT2B4 PM Mean	0															Target20 Lambda (1/h)	0
Abundance: SLC22A2 (OCT2) IT Freq	0	Abundance : CYP3A7 UM Mean	0	UGT2B17 EM Mean CV (%)	50			UGT2B4 PM Mean CV (%)	0
Abundance: SLC22A2 (OCT2) UT Freq	0	Abundance : CYP3A7 UM CV (%)	0	UGT2B17 PM Mean	0.08			UGT2B4 UM Mean	0
Abundance: SLC22A6 (OAT1) PT Freq	0	Abundance : CYP3A7 IM Mean	0	UGT2B17 PM Mean CV (%)	50			UGT2B4 UM Mean CV (%)	0
Abundance: SLC22A6 (OAT1) IT Freq	0	Abundance : CYP3A7 IM CV (%)	0	UGT2B17 UM Mean	0			UGT2B4 IM Mean	0
Abundance: SLC22A6 (OAT1) UT Freq	0	Turnover rate : CYP3A7 Mean	0.019	UGT2B17 UM Mean CV (%)	0			UGT2B4 IM Mean CV (%)	0
Abundance: SLC22A8 (OAT3) PT Freq	0	Turnover rate : CYP3A7 CV (%)	68	UGT2B17 IM Mean	0.16			UGT2B4 Absolute Abundance	0
Abundance: SLC22A8 (OAT3) IT Freq	0	3A4 M/F difference	same	UGT2B17 IM Mean CV (%)	50			UGT2B7 EM Mean	1
Abundance: SLC22A8 (OAT3) UT Freq	0	Abundance : 3A4 Mean : Male	137	UGT2B17 Absolute Abundance	0			UGT2B7 EM Mean CV (%)	60
Abundance: SLC47As (MATEs) PT Freq	0	Abundance : 3A4 CV (%) : Male	41	UGT2B28 EM Mean	1			UGT2B7 PM Mean	0
Abundance: SLC47As (MATEs) IT Freq	0	Abundance : 3A4 Mean : Female	137	UGT2B28 EM Mean CV (%)	50			UGT2B7 PM Mean CV (%)	0
Abundance: SLC47As (MATEs) UT Freq	0	Abundance : 3A4 CV (%) : Female	41	UGT2B28 PM Mean	0			UGT2B7 UM Mean	0
Abundance: Apical Influx PT Freq	0	Abundance : CYP2C9 Mean	83.4	UGT2B28 PM Mean CV (%)	0			UGT2B7 UM Mean CV (%)	0
Abundance: Apical Influx IT Freq	0	Abundance : CYP2C9 CV (%)	60.5	UGT2B28 UM Mean	0			UGT2B7 IM Mean	0
Abundance: Apical Influx UT Freq	0	Turnover rate : CYP2C9 Mean	0.0067	UGT2B28 UM Mean CV (%)	0			UGT2B7 IM Mean CV (%)	0
Abundance: Apical Influx (Kidney) PT Freq	0	Turnover rate : CYP2C9 CV (%)	56	UGT2B28 IM Mean	0			UGT2B7 Absolute Abundance	4.5
Abundance: Apical Influx (Kidney) IT Freq	0	Abundance : CYP2C9 Mean	75.8	UGT2B28 IM Mean CV (%)	0			UGT2B10 EM Mean	1
Abundance: Apical Influx (Kidney) UT Freq	0	Abundance : CYP2C9 CV (%)	63.8	UGT2B28 Absolute Abundance	0			UGT2B10 EM Mean CV (%)	60
Abundance: Basal Efflux (Kidney) PT Freq	0	Turnover rate : CYP2C9 Mean	0.0067	Use User UGT Option	Yes			UGT2B10 PM Mean	0
Abundance: Basal Efflux (Kidney) IT Freq	0	Turnover rate : CYP2C9 CV (%)	56	UGT User	1			UGT2B10 PM Mean CV (%)	0
Abundance: Basal Efflux (Kidney) UT Freq	0	Abundance : CYP2C9 Mean	75.8	User UGT1 EM Mean	1			UGT2B10 UM Mean	0
		Abundance : CYP2C9 CV (%)	63.8	User UGT1 EM Mean CV (%)	50			UGT2B10 UM Mean CV (%)	0
		Turnover rate : CYP2C9 Mean	0.0067	User UGT1 PM Mean	0			UGT2B10 IM Mean	0
		Turnover rate : CYP2C9 CV (%)	56	User UGT1 PM Mean CV (%)	0			UGT2B10 IM Mean CV (%)	0
		Abundance : CYP2C9 Mean	75.8	User UGT1 UM Mean	0			UGT2B10 Absolute Abundance	0.1
		Abundance : CYP2C9 CV (%)	63.8	User UGT1 UM Mean CV (%)	0			UGT2B11 EM Mean	1
		Turnover rate : CYP2C9 Mean	0.0067	User UGT1 IM Mean	0			UGT2B11 EM Mean CV (%)	60
		Turnover rate : CYP2C9 CV (%)	56	User UGT1 IM Mean CV (%)	0			UGT2B11 PM Mean	0
		Abundance : CYP2C9 Mean	75.8	User UGT1 Absolute Abundance	0			UGT2B11 PM Mean CV (%)	0
		Abundance : CYP2C9 CV (%)	63.8	Use User Cytosolic Enzyme Option	Yes			UGT2B11 UM Mean	0
		Turnover rate : CYP2C9 Mean	0.0067	User Cyt	1			UGT2B11 UM Mean CV (%)	0
		Turnover rate : CYP2C9 CV (%)	56	User Cyt1 EM Mean	1			UGT2B11 IM Mean	0
		Abundance : CYP2C9 Mean	23	User Cyt1 EM Mean CV (%)	30			UGT2B11 IM Mean CV (%)	0
		Abundance : CYP2C9 CV (%)	60	User Cyt1 PM Mean	0			UGT2B11 Absolute Abundance	0
		Turnover rate : CYP2C9 Mean	0.0067	User Cyt1 PM Mean CV (%)	0			UGT2B15 EM Mean	1
		Turnover rate : CYP2C9 CV (%)	56	User Cyt1 UM Mean	0			UGT2B15 EM Mean CV (%)	60
		Abundance : UGT1A1 EM Mean	1	User Cyt1 UM Mean CV (%)	0			UGT2B15 PM Mean	0.07
		Abundance : UGT1A1 EM CV (%)	24	User Cyt1 IM Mean	0			UGT2B15 PM Mean CV (%)	60
		Abundance : UGT1A1 PM Mean	0.4	User Cyt1 IM Mean CV (%)	0			UGT2B15 UM Mean	0
		Abundance : UGT1A1 PM CV (%)	50.8	Use User Cytosolic Enzyme Option	Yes			UGT2B15 UM Mean CV (%)	0
		Abundance : UGT1A1 UM Mean	0	User Cyt	2			UGT2B15 IM Mean	0.07
		Abundance : UGT1A1 UM CV (%)	0	User Cyt2 EM Mean	1			UGT2B15 IM Mean CV (%)	60
		Abundance : UGT1A1 IM Mean	0.83	User Cyt2 EM Mean CV (%)	30			UGT2B15 Absolute Abundance	0.1
		Abundance : UGT1A1 IM CV (%)	39.9	User Cyt2 PM Mean	0			UGT2B17 EM Mean	1
		Absolute Abundance : UGT1A1	48	User Cyt2 PM Mean CV (%)	0			UGT2B17 EM Mean CV (%)	60
		Abundance : UGT1A3 EM Mean	1	User Cyt2 UM Mean	0			UGT2B17 PM Mean	0.08
		Abundance : UGT1A3 EM CV (%)	36	User Cyt2 UM Mean CV (%)	0			UGT2B17 PM Mean CV (%)	60
		Abundance : UGT1A3 PM Mean	0	User Cyt2 IM Mean	0			UGT2B17 UM Mean	0
		Abundance : UGT1A3 PM CV (%)	0	User Cyt2 IM Mean CV (%)	0			UGT2B17 UM Mean CV (%)	0
		Abundance : UGT1A3 UM Mean	0	Use User Cytosolic Enzyme Option	Yes			UGT2B17 IM Mean	0.08
		Abundance : UGT1A3 UM CV (%)	0	User Cyt	3			UGT2B17 IM Mean CV (%)	60
		Abundance : UGT1A3 IM Mean	0	User Cyt3 EM Mean	1			UGT2B17 Absolute Abundance	11
		Abundance : UGT1A3 IM CV (%)	0	User Cyt3 EM Mean CV (%)	30			UGT2B28 EM Mean	1
		Absolute Abundance : UGT1A3	23	User Cyt3 PM Mean	0			UGT2B28 EM Mean CV (%)	60
		Abundance : UGT1A4 EM Mean	1	User Cyt3 PM Mean CV (%)	0			UGT2B28 PM Mean	0
		Abundance : UGT1A4 EM CV (%)	39	User Cyt3 UM Mean	0			UGT2B28 PM Mean CV (%)	0
		Abundance : UGT1A4 PM Mean	0.7	User Cyt3 UM Mean CV (%)	0			UGT2B28 UM Mean	0
		Abundance : UGT1A4 PM CV (%)	39	User Cyt3 IM Mean	0			UGT2B28 UM Mean CV (%)	0
		Abundance : UGT1A4 UM Mean	0	User Cyt3 IM Mean CV (%)	0			UGT2B28 IM Mean	0
		Abundance : UGT1A4 UM CV (%)	0	Use User Cytosolic Enzyme Option	Yes			UGT2B28 IM Mean CV (%)	0
		Abundance : UGT1A4 IM Mean	0	User Cyt	4			UGT2B28 Absolute Abundance	0
		Abundance : UGT1A4 IM CV (%)	0	User Cyt4 EM Mean	1			Use User UGT Option	Yes
		Absolute Abundance : UGT1A4	52	User Cyt4 EM Mean CV (%)	30			UGT User	1
		Abundance : UGT1A5 EM Mean	1	User Cyt4 PM Mean	0			User UGT1 EM Mean	1
		Abundance : UGT1A5 EM CV (%)	30	User Cyt4 PM Mean CV (%)	0			User UGT1 EM Mean CV (%)	60
		Abundance : UGT1A5 PM Mean	0	User Cyt4 UM Mean	0			User UGT1 PM Mean	0
		Abundance : UGT1A5 PM CV (%)	0	User Cyt4 UM Mean CV (%)	0			User UGT1 PM Mean CV (%)	0
		Abundance : UGT1A5 UM Mean	0	User Cyt4 IM Mean	0			User UGT1 UM Mean	0
		Abundance : UGT1A5 UM CV (%)	0	User Cyt4 IM Mean CV (%)	0			User UGT1 UM Mean CV (%)	0
		Abundance : UGT1A5 IM Mean	0	Cortex/Medulla Ratio	0.92			User UGT1 IM Mean	0
		Abundance : UGT1A5 IM CV (%)	0	Pertubular Capillary (% Kidney volume)	7			User UGT1 IM Mean CV (%)	0
		Absolute Abundance : UGT1A5	0	Million Nephrons per Subject Baseline	0.22693			User UGT1 Absolute Abundance	0
		Abundance : UGT1A6 EM Mean	1	Kidney Weight Coefficient	0.003948			Use User Cytosolic Enzyme Option	Yes
		Abundance : UGT1A6 EM CV (%)	30	Proximal Tubule Length (mm)	18			User Cyt	1
		Abundance : UGT1A6 PM Mean	0	Henle's Loop Length (mm)	7			User Cyt1 EM Mean	1
		Abundance : UGT1A6 PM CV (%)	0	Distal Tubule Length (mm)	5.5			User Cyt1 EM Mean CV (%)	60
		Abundance : UGT1A6 UM Mean	0	Collecting Duct Length (mm)	22			User Cyt1 PM Mean	0
		Abundance : UGT1A6 UM CV (%)	0	Proximal Tubule Diameter (mm)	0.06			User Cyt1 PM Mean CV (%)	0
		Abundance : UGT1A6 IM Mean	0	Henle's Loop Diameter (mm)	0.018			User Cyt1 UM Mean	0
		Abundance : UGT1A6 IM CV (%)	0	Distal Tubule Diameter (mm)	0.05			User Cyt1 UM Mean CV (%)	0
		Absolute Abundance : UGT1A6	20	Collecting Duct Diameter (mm)	0.2			User Cyt1 IM Mean	0
		Abundance : UGT1A7 EM Mean	1	Proximal Tubule pH	7.4			User Cyt1 IM Mean CV (%)	0
		Abundance : UGT1A7 EM CV (%)	30	Henle's Loop pH	7.4			Use User Cytosolic Enzyme Option	Yes
		Abundance : UGT1A7 PM Mean	0	Distal Tubule pH	7.4			User Cyt	2
		Abundance : UGT1A7 PM CV (%)	0	Collecting Duct pH	7.4			User Cyt2 EM Mean	1
		Abundance : UGT1A7 UM Mean	0	GFR Male Input Type	predicted			User Cyt2 EM Mean CV (%)	60
		Abundance : UGT1A7 UM CV (%)	0	Male - Proximal Tubule Urine Flow Rate - GFR (mL/min)	120			User Cyt2 PM Mean	0
		Abundance : UGT1A7 IM Mean	0	Male - Henle's Loop Urine Flow Rate (mL/min)	43			User Cyt2 PM Mean CV (%)	0
		Abundance : UGT1A7 IM CV (%)	0	Male - Distal Tubule Urine Flow Rate (mL/min)	24			User Cyt2 UM Mean	0
		Absolute Abundance : UGT1A7	0	Male - Collecting Duct Urine Flow Rate (mL/min)	11			User Cyt2 UM Mean CV (%)	0
		Abundance : UGT1A8 EM Mean	1	Male - Urine Flow Rate into Bladder (mL/min)	1			User Cyt2 IM Mean	0
		Abundance : UGT1A8 EM CV (%)	30	GFR Female Input Type	predicted			User Cyt2 IM Mean CV (%)	0
		Abundance : UGT1A8 PM Mean	0	Female - Proximal Tubule Urine Flow Rate - GFR (mL/min)	130			Use User Cytosolic Enzyme Option	Yes
		Abundance : UGT1A8 PM CV (%)	0	Female - Henle's Loop Urine Flow Rate (mL/min)	47			User Cyt	3
		Abundance : UGT1A8 UM Mean	0	Female - Distal Tubule Urine Flow Rate (mL/min)	26			User Cyt3 EM Mean	1
		Abundance : UGT1A8 UM CV (%)	0	Female - Collecting Duct Urine Flow Rate (mL/min)	12			User Cyt3 EM Mean CV (%)	60
		Abundance : UGT1A8 IM Mean	0	Female - Urine Flow Rate into Bladder (mL/min)	1			User Cyt3 PM Mean	0
		Abundance : UGT1A8 IM CV (%)	0	Bypass 1 before Glomerulus (%)	10			User Cyt3 PM Mean CV (%)	0
		Absolute Abundance : UGT1A8	0	Bypass 1 before Glomerulus CV (%)	30			User Cyt3 UM Mean	0
		Abundance : UGT1A9 EM Mean	1	Bypass 2 to Henle's Loop & Medu-CD (%)	20			User Cyt3 UM Mean CV (%)	0
		Abundance : UGT1A9 EM CV (%)	30	Bypass 2 to Henle's Loop & Medu-CD CV (%)	30			User Cyt3 IM Mean	0
		Abundance : UGT1A9 PM Mean	0	PT-S1 ABCB1 (MDR1/P-gp) / 106 PTC (Relative Values)	1			User Cyt3 IM Mean CV (%)	0
		Abundance : UGT1A9 PM CV (%)	0	PT-S1 ABCC4 (MRP4) / 106 PTC (Relative Values)	1			Use User Cytosolic Enzyme Option	Yes
		Abundance : UGT1A9 UM Mean	0	PT-S1 SLC22A2 (OCT2) / 106 PTC (Relative Values)	1			User Cyt	4
		Abundance : UGT1A9 UM CV (%)	0	PT-S1 SLC22A6 (OAT1) / 106 PTC (Relative Values)	1			User Cyt4 EM Mean	1
		Abundance : UGT1A9 IM Mean	0	PT-S1 SLC22A8 (OAT3) / 106 PTC (Relative Values)	1			User Cyt4 EM Mean CV (%)	60
		Abundance : UGT1A9 IM CV (%)	0	PT-S1 SLC47As (MATEs) / 106 PTC (Relative Values)	1			User Cyt4 PM Mean	0
		Absolute Abundance : UGT1A9	31	PT-S1 Apical Influx (Kidney) / 106 PTC (Relative Values)	1			User Cyt4 PM Mean CV (%)	0
		Abundance : UGT1A10 EM Mean	1	PT-S1 Basal Efflux (Kidney) / 106 PTC (Relative Values)	1			User Cyt4 UM Mean	0
		Abundance : UGT1A10 EM CV (%)	30	PT-S2 ABCB1 (MDR1/P-gp) / 106 PTC (Relative Values)	1			User Cyt4 UM Mean CV (%)	0
		Abundance : UGT1A10 PM Mean	0	PT-S2 ABCC4 (MRP4) / 106 PTC (Relative Values)	1			User Cyt4 IM Mean	0
		Abundance : UGT1A10 PM CV (%)	0	PT-S2 SLC22A2 (OCT2) / 106 PTC (Relative Values)	1			User Cyt4 IM Mean CV (%)	0
		Abundance : UGT1A10 UM Mean	0	PT-S2 SLC22A6 (OAT1) / 106 PTC (Relative Values)	1			Achlorhydric Coefficient	0
		Abundance : UGT1A10 UM CV (%)	0	PT-S2 SLC22A8 (OAT3) / 106 PTC (Relative Values)	1			Achlorhydric Age Power	0
		Abundance : UGT1A10 IM Mean	0	PT-S2 SLC47As (MATEs) / 106 PTC (Relative Values)	1			Achlorhydric Maximum (%)	0
		Abundance : UGT1A10 IM CV (%)	0	PT-S2 Apical Influx (Kidney) / 106 PTC (Relative Values)	1			Stomach pH Fasted	1.5
		Absolute Abundance : UGT1A10	0.02	PT-S2 Basal Efflux (Kidney) / 106 PTC (Relative Values)	1			Stomach CV pH Fasted (%)	38
		Abundance : UGT2B4 EM Mean	1	PT-S3 ABCB1 (MDR1/P-gp) / 106 PTC (Relative Values)	1			Stomach pH Fed	5
		Abundance : UGT2B4 EM CV (%)	28	PT-S3 ABCC4 (MRP4) / 106 PTC (Relative Values)	1			Stomach CV pH Fed (%)	25
		Abundance : UGT2B4 PM Mean	0	PT-S3 SLC22A2 (OCT2) / 106 PTC (Relative Values)	1			Stomach Bicarbonate Buffer Concentration Fasted (mM)	9.23
		Abundance : UGT2B4 PM CV (%)	0	PT-S3 SLC22A6 (OAT1) / 106 PTC (Relative Values)	1			Stomach Bicarbonate Buffer Concentration CV Fasted (%)	29.51
		Abundance : UGT2B4 UM Mean	0	PT-S3 SLC22A8 (OAT3) / 106 PTC (Relative Values)	1			Stomach Bicarbonate Buffer Concentration Fed (mM)	61.88
		Abundance : UGT2B4 UM CV (%)	0	PT-S3 SLC47As (MATEs) / 106 PTC (Relative Values)	1			Stomach Bicarbonate Buffer Concentration CV Fed (%)	13.86
		Abundance : UGT2B4 IM Mean	0	PT-S3 Apical Influx (Kidney) / 106 PTC (Relative Values)	1			Stomach Luminal Fluid Velocity Fasted (m/s)	0.032
		Abundance : UGT2B4 IM CV (%)	0	PT-S3 Basal Efflux (Kidney) / 106 PTC (Relative Values)	1			Stomach Luminal Fluid Velocity CV Fasted (%)	30
		Absolute Abundance : UGT2B4	54	ABCB1 (P-gp) ET Mean	1			Stomach Luminal Fluid Velocity Fed (m/s)	0.032
		Abundance : UGT2B7 EM Mean	1	ABCB1 (P-gp) ET CV (%)	60			Stomach Luminal Fluid Velocity CV Fed (%)	30
		Abundance : UGT2B7 EM CV (%)	30.4	ABCB1 (P-gp) PT Mean	0			Stomach CMC fasted (mM)	1
		Abundance : UGT2B7 PM Mean	0	ABCB1 (P-gp) PT CV (%)	0			Stomach CMC fed (mM)	1
		Abundance : UGT2B7 PM CV (%)	0	ABCB1 (P-gp) IT Mean	0			Stomach Bile fasted (mM)	0.29
		Abundance : UGT2B7 UM Mean	0	ABCB1 (P-gp) IT CV (%)	0			Stomach Bile fasted CV	141
		Abundance : UGT2B7 UM CV (%)	0	ABCB1 (P-gp) UT Mean	0			Stomach Bile fed (mM)	0.29
		Abundance : UGT2B7 IM Mean	0	ABCB1 (P-gp) UT CV (%)	0			Stomach Bile fed CV	100
		Abundance : UGT2B7 IM CV (%)	0	ABCC4 (MRP4) ET Mean	1			Duodenum Blood Flow (Qvilli %)	8.8
		Absolute Abundance : UGT2B7	71	ABCC4 (MRP4) ET CV (%)	60			Duodenum Transit Time (% Total)	4.6
		Abundance : UGT2B10 EM Mean	1	ABCC4 (MRP4) PT Mean	0			Duodenum CYP3A (% Total)	13.76
		Abundance : UGT2B10 EM CV (%)	30	ABCC4 (MRP4) PT CV (%)	0			Duodenum S9PPI (% Total)	14.88
		Abundance : UGT2B10 PM Mean	0	ABCC4 (MRP4) IT Mean	0			Duodenum MPPI/CYP (% Total)	13.76
		Abundance : UGT2B10 PM CV (%)	0	ABCC4 (MRP4) IT CV (%)	0			Duodenum CPPI (% Total)	14.88
		Abundance : UGT2B10 UM Mean	0	ABCC4 (MRP4) UT Mean	0			Duodenum pH Fasted	6.4
		Abundance : UGT2B10 UM CV (%)	0	ABCC4 (MRP4) UT CV (%)	0			Duodenum CV pH Fasted (%)	16
		Abundance : UGT2B10 IM Mean	0	SLC22A2 (OCT2) ET Mean	1			Duodenum pH Fed	5.4
		Abundance : UGT2B10 IM CV (%)	0	SLC22A2 (OCT2) ET CV (%)	60			Duodenum CV pH Fed (%)	11
		Absolute Abundance : UGT2B10	6.5	SLC22A2 (OCT2) PT Mean	0			Duodenum Bicarbonate Buffer Concentration Fasted (mM)	8.81
		Abundance : UGT2B11 EM Mean	1	SLC22A2 (OCT2) PT CV (%)	0			Duodenum Bicarbonate Buffer Concentration CV Fasted (%)	57.23
		Abundance : UGT2B11 EM CV (%)	30	SLC22A2 (OCT2) IT Mean	0			Duodenum Bicarbonate Buffer Concentration Fed (mM)	42.78
		Abundance : UGT2B11 PM Mean	0	SLC22A2 (OCT2) IT CV (%)	0			Duodenum Bicarbonate Buffer Concentration CV Fed (%)	44.58
		Abundance : UGT2B11 PM CV (%)	0	SLC22A2 (OCT2) UT Mean	0			Duodenum Luminal Fluid Velocity Fasted (m/s)	0.005
		Abundance : UGT2B11 UM Mean	0	SLC22A2 (OCT2) UT CV (%)	0			Duodenum Luminal Fluid Velocity CV Fasted (%)	30
		Abundance : UGT2B11 UM CV (%)	0	SLC22A6 (OAT1) ET Mean	1			Duodenum Luminal Fluid Velocity Fed (m/s)	0.005
		Abundance : UGT2B11 IM Mean	0	SLC22A6 (OAT1) ET CV (%)	60			Duodenum Luminal Fluid Velocity CV Fed (%)	30
		Abundance : UGT2B11 IM CV (%)	0	SLC22A6 (OAT1) PT Mean	0			Duodenum CMC fasted (mM)	1
		Absolute Abundance : UGT2B11	0	SLC22A6 (OAT1) PT CV (%)	0			Duodenum CMC fed (mM)	1
		Abundance : UGT2B15 EM Mean	1	SLC22A6 (OAT1) IT Mean	0			Duodenum Bile fasted (mM)	3.31
		Abundance : UGT2B15 EM CV (%)	34	SLC22A6 (OAT1) IT CV (%)	0			Duodenum Bile fasted CV	97
		Abundance : UGT2B15 PM Mean	0.07	SLC22A6 (OAT1) UT Mean	0			Duodenum Bile fed (mM)	8.74
		Abundance : UGT2B15 PM CV (%)	33	SLC22A6 (OAT1) UT CV (%)	0			Duodenum Bile fed CV	79
		Abundance : UGT2B15 UM Mean	0	SLC22A8 (OAT3) ET Mean	1			Duodenum Channel Depth Mean (µm)	522.78
		Abundance : UGT2B15 UM CV (%)	0	SLC22A8 (OAT3) ET CV (%)	60			Duodenum Channel Depth CV (%)	32.72
		Abundance : UGT2B15 IM Mean	0.47	SLC22A8 (OAT3) PT Mean	0			Duodenum Channel Width Mean (µm)	28.03
		Abundance : UGT2B15 IM CV (%)	37	SLC22A8 (OAT3) PT CV (%)	0			Duodenum Channel Width CV (%)	28.69
		Absolute Abundance : UGT2B15	39	SLC22A8 (OAT3) IT Mean	0			Duodenum Mean Thickness Mean (µm)	128.35
		Abundance : UGT2B17 EM Mean	1	SLC22A8 (OAT3) IT CV (%)	0			Duodenum Mean Thickness CV (%)	8.1
		Abundance : UGT2B17 EM CV (%)	28	SLC22A8 (OAT3) UT Mean	0			Duodenum Fold Expansion Mean	1
		Abundance : UGT2B17 PM Mean	0.08	SLC22A8 (OAT3) UT CV (%)	0			Duodenum Fold Expansion CV (%)	0
		Abundance : UGT2B17 PM CV (%)	40	SLC47As (MATEs) ET Mean	1			Duodenum Pore Radius Mean	8.6
		Abundance : UGT2B17 UM Mean	0	SLC47As (MATEs) ET CV (%)	60			Duodenum Pore Radius CV (%)	0
		Abundance : UGT2B17 UM CV (%)	0	SLC47As (MATEs) PT Mean	0			Duodenum Unstirred Layer Thickness Mean (µm)	170
		Abundance : UGT2B17 IM Mean	0.16	SLC47As (MATEs) PT CV (%)	0			Duodenum Unstirred Layer Thickness CV (%)	22.35
		Abundance : UGT2B17 IM CV (%)	30	SLC47As (MATEs) IT Mean	0			Duodenum Unstirred Layer pH	6.5
		Absolute Abundance : UGT2B17	5.9	SLC47As (MATEs) IT CV (%)	0			Duodenum Unstirred Layer CV (%)	0.5
		Abundance : UGT2B28 EM Mean	1	SLC47As (MATEs) UT Mean	0			Duodenum ABCB1 (P-gp)/cm² (Relative values)	0.51
		Abundance : UGT2B28 EM CV (%)	30	SLC47As (MATEs) UT CV (%)	0			Duodenum ABCC2 (MRP2)/cm² (Relative values)	1.41
		Abundance : UGT2B28 PM Mean	0	Apical Influx (Kidney) ET Mean	1			Duodenum ABCG2 (BCRP)/cm² (Relative values)	0.47
		Abundance : UGT2B28 PM CV (%)	0	Apical Influx (Kidney) ET CV (%)	60			Duodenum Apical Influx/cm² (Relative values)	1
		Abundance : UGT2B28 UM Mean	0	Apical Influx (Kidney) PT Mean	0			Jejunum I Blood Flow (Qvilli %)	24.2
		Abundance : UGT2B28 UM CV (%)	0	Apical Influx (Kidney) PT CV (%)	0			Jejunum I Transit Time (% Total)	17.3
		Abundance : UGT2B28 IM Mean	0	Apical Influx (Kidney) IT Mean	0			Jejunum I CYP3A (% Total)	27.24
		Abundance : UGT2B28 IM CV (%)	0	Apical Influx (Kidney) IT CV (%)	0			Jejunum I S9PPI (% Total)	26.9
		Absolute Abundance : UGT2B28	0	Apical Influx (Kidney) UT Mean	0			Jejunum I MPPI/CYP (% Total)	27.24
		Use User UGT Option	Yes	Apical Influx (Kidney) UT CV (%)	0			Jejunum I CPPI (% Total)	26.9
		UGT User	1	Basal Efflux (Kidney) ET Mean	1			Jejunum I pH Fasted	6.5
		Abundance : User UGT1 EM Mean	1	Basal Efflux (Kidney) ET CV (%)	60			Jejunum I CV pH Fasted (%)	13
		Abundance : User UGT1 EM CV (%)	30	Basal Efflux (Kidney) PT Mean	0			Jejunum I pH Fed	6.5
		Abundance : User UGT1 PM Mean	0	Basal Efflux (Kidney) PT CV (%)	0			Jejunum I CV pH Fed (%)	13
		Abundance : User UGT1 PM CV (%)	0	Basal Efflux (Kidney) IT Mean	0			Jejunum I Bicarbonate Buffer Concentration Fasted (mM)	13.95
		Abundance : User UGT1 UM Mean	0	Basal Efflux (Kidney) IT CV (%)	0			Jejunum I Bicarbonate Buffer Concentration CV Fasted (%)	54.28
		Abundance : User UGT1 UM CV (%)	0	Basal Efflux (Kidney) UT Mean	0			Jejunum I Bicarbonate Buffer Concentration Fed (mM)	25.45
		Abundance : User UGT1 IM Mean	0	Basal Efflux (Kidney) UT CV (%)	0			Jejunum I Bicarbonate Buffer Concentration CV Fed (%)	5.05
		Abundance : User UGT1 IM CV (%)	0					Jejunum I Luminal Fluid Velocity Fasted (m/s)	0.0013
		Absolute Abundance : User UGT1	0					Jejunum I Luminal Fluid Velocity CV Fasted (%)	56
		Use User Cytosolic Enzyme Option	Yes					Jejunum I Luminal Fluid Velocity Fed (m/s)	0.0013
		User Cyt	1					Jejunum I Luminal Fluid Velocity CV Fed (%)	56
		Abundance : User Cyt1 EM Mean	1					Jejunum I CMC fasted (mM)	1
		Abundance : User Cyt1 EM CV (%)	30					Jejunum I CMC fed (mM)	1
		Abundance : User Cyt1 PM Mean	0					Jejunum I Bile fasted (mM)	2.3
		Abundance : User Cyt1 PM CV (%)	0					Jejunum I Bile fasted CV	100
		Abundance : User Cyt1 UM Mean	0					Jejunum I Bile fed (mM)	10.03
		Abundance : User Cyt1 UM CV (%)	0					Jejunum I Bile fed CV	73
		Abundance : User Cyt1 IM Mean	0					Jejunum I Channel Depth Mean (µm)	448.81
		Abundance : User Cyt1 IM CV (%)	0					Jejunum I Channel Depth CV (%)	21.82
		Use User Cytosolic Enzyme Option	Yes					Jejunum I Channel Width Mean (µm)	22.44
		User Cyt	2					Jejunum I Channel Width CV (%)	31.68
		Abundance : User Cyt2 EM Mean	1					Jejunum I Mean Thickness Mean (µm)	137.7
		Abundance : User Cyt2 EM CV (%)	30					Jejunum I Mean Thickness CV (%)	14.42
		Abundance : User Cyt2 PM Mean	0					Jejunum I Fold Expansion Mean	1.97
		Abundance : User Cyt2 PM CV (%)	0					Jejunum I Fold Expansion CV (%)	24.54
		Abundance : User Cyt2 UM Mean	0					Jejunum I Pore Radius Mean	8.6
		Abundance : User Cyt2 UM CV (%)	0					Jejunum I Pore Radius CV (%)	0
		Abundance : User Cyt2 IM Mean	0					Jejunum I Unstirred Layer Thickness Mean (µm)	123
		Abundance : User Cyt2 IM CV (%)	0					Jejunum I Unstirred Layer Thickness CV (%)	3
		Use User Cytosolic Enzyme Option	Yes					Jejunum I Unstirred Layer pH	6.5
		User Cyt	3					Jejunum I Unstirred Layer CV (%)	0.5
		Abundance : User Cyt3 EM Mean	1					Jejunum I ABCB1 (P-gp)/cm² (Relative values)	1
		Abundance : User Cyt3 EM CV (%)	30					Jejunum I ABCC2 (MRP2)/cm² (Relative values)	1
		Abundance : User Cyt3 PM Mean	0					Jejunum I ABCG2 (BCRP)/cm² (Relative values)	1
		Abundance : User Cyt3 PM CV (%)	0					Jejunum I Apical Influx/cm² (Relative values)	1
		Abundance : User Cyt3 UM Mean	0					Jejunum II Blood Flow (Qvilli %)	24.2
		Abundance : User Cyt3 UM CV (%)	0					Jejunum II Transit Time (% Total)	17.3
		Abundance : User Cyt3 IM Mean	0					Jejunum II CYP3A (% Total)	27.24
		Abundance : User Cyt3 IM CV (%)	0					Jejunum II S9PPI (% Total)	26.9
		Use User Cytosolic Enzyme Option	Yes					Jejunum II MPPI/CYP (% Total)	27.24
		User Cyt	4					Jejunum II CPPI (% Total)	26.9
		Abundance : User Cyt4 EM Mean	1					Jejunum II pH Fasted	6.6
		Abundance : User Cyt4 EM CV (%)	30					Jejunum II CV pH Fasted (%)	11
		Abundance : User Cyt4 PM Mean	0					Jejunum II pH Fed	6.6
		Abundance : User Cyt4 PM CV (%)	0					Jejunum II CV pH Fed (%)	11
		Abundance : User Cyt4 UM Mean	0					Jejunum II Bicarbonate Buffer Concentration Fasted (mM)	13.95
		Abundance : User Cyt4 UM CV (%)	0					Jejunum II Bicarbonate Buffer Concentration CV Fasted (%)	54.28
		Abundance : User Cyt4 IM Mean	0					Jejunum II Bicarbonate Buffer Concentration Fed (mM)	25.45
		Abundance : User Cyt4 IM CV (%)	0					Jejunum II Bicarbonate Buffer Concentration CV Fed (%)	5.05
		Abundance: ABCB1 (P-gp) ET Mean	1					Jejunum II Luminal Fluid Velocity Fasted (m/s)	0.0013
		Abundance: ABCB1 (P-gp) ET CV (%)	61					Jejunum II Luminal Fluid Velocity CV Fasted (%)	56
		Abundance: ABCB1 (P-gp) PT Mean	0					Jejunum II Luminal Fluid Velocity Fed (m/s)	0.0013
		Abundance: ABCB1 (P-gp) PT CV (%)	0					Jejunum II Luminal Fluid Velocity CV Fed (%)	56
		Abundance: ABCB1 (P-gp) IT Mean	0					Jejunum II CMC fasted (mM)	1
		Abundance: ABCB1 (P-gp) IT CV (%)	0					Jejunum II CMC fed (mM)	1
		Abundance: ABCB1 (P-gp) UT Mean	0					Jejunum II Bile fasted (mM)	3.55
		Abundance: ABCB1 (P-gp) UT CV (%)	0					Jejunum II Bile fasted CV	42
		Abundance: ABCC2 (MRP2) ET Mean	1					Jejunum II Bile fed (mM)	4.79
		Abundance: ABCC2 (MRP2) ET CV (%)	60					Jejunum II Bile fed CV	66
		Abundance: ABCC2 (MRP2) PT Mean	0					Jejunum II Channel Depth Mean (µm)	448.81
		Abundance: ABCC2 (MRP2) PT CV (%)	0					Jejunum II Channel Depth CV (%)	21.82
		Abundance: ABCC2 (MRP2) IT Mean	0					Jejunum II Channel Width Mean (µm)	22.44
		Abundance: ABCC2 (MRP2) IT CV (%)	0					Jejunum II Channel Width CV (%)	31.68
		Abundance: ABCC2 (MRP2) UT Mean	0					Jejunum II Mean Thickness Mean (µm)	137.7
		Abundance: ABCC2 (MRP2) UT CV (%)	0					Jejunum II Mean Thickness CV (%)	14.42
		Abundance: ABCC3 (MRP3) ET Mean	1					Jejunum II Fold Expansion Mean	1.38
		Abundance: ABCC3 (MRP3) ET CV (%)	104					Jejunum II Fold Expansion CV (%)	20.19
		Abundance: ABCC3 (MRP3) PT Mean	0					Jejunum II Pore Radius Mean	8.6
		Abundance: ABCC3 (MRP3) PT CV (%)	0					Jejunum II Pore Radius CV (%)	0
		Abundance: ABCC3 (MRP3) IT Mean	0					Jejunum II Unstirred Layer Thickness Mean (µm)	123
		Abundance: ABCC3 (MRP3) IT CV (%)	0					Jejunum II Unstirred Layer Thickness CV (%)	3
		Abundance: ABCC3 (MRP3) UT Mean	0					Jejunum II Unstirred Layer pH	6.5
		Abundance: ABCC3 (MRP3) UT CV (%)	0					Jejunum II Unstirred Layer CV (%)	0.5
		Abundance: ABCG2 (BCRP) ET Mean	1					Jejunum II ABCB1 (P-gp)/cm² (Relative values)	1.46
		Abundance: ABCG2 (BCRP) ET CV (%)	42					Jejunum II ABCC2 (MRP2)/cm² (Relative values)	1
		Abundance: ABCG2 (BCRP) PT Mean	0					Jejunum II ABCG2 (BCRP)/cm² (Relative values)	1
		Abundance: ABCG2 (BCRP) PT CV (%)	0					Jejunum II Apical Influx/cm² (Relative values)	1
		Abundance: ABCG2 (BCRP) IT Mean	0					Ileum I Blood Flow (Qvilli %)	10.7
		Abundance: ABCG2 (BCRP) IT CV (%)	0					Ileum I Transit Time (% Total)	15.2
		Abundance: ABCG2 (BCRP) UT Mean	0					Ileum I CYP3A (% Total)	7.94
		Abundance: ABCG2 (BCRP) UT CV (%)	0					Ileum I S9PPI (% Total)	7.83
		Abundance: SLCO1B1 (OATP1B1) ET Mean	1					Ileum I MPPI/CYP (% Total)	7.94
		Abundance: SLCO1B1 (OATP1B1) ET CV (%)	74					Ileum I CPPI (% Total)	7.83
		Abundance: SLCO1B1 (OATP1B1) PT Mean	0.37					Ileum I pH Fasted	6.8
		Abundance: SLCO1B1 (OATP1B1) PT CV (%)	35					Ileum I CV pH Fasted (%)	10
		Abundance: SLCO1B1 (OATP1B1) IT Mean	0.68					Ileum I pH Fed	6.8
		Abundance: SLCO1B1 (OATP1B1) IT CV (%)	54					Ileum I CV pH Fed (%)	10
		Abundance: SLCO1B1 (OATP1B1) UT Mean	1.47					Ileum I Bicarbonate Buffer Concentration Fasted (mM)	54.14
		Abundance: SLCO1B1 (OATP1B1) UT CV (%)	46					Ileum I Bicarbonate Buffer Concentration CV Fasted (%)	34.4
		Abundance: SLCO1B3 (OATP1B3) ET Mean	1					Ileum I Bicarbonate Buffer Concentration Fed (mM)	54.14
		Abundance: SLCO1B3 (OATP1B3) ET CV (%)	49					Ileum I Bicarbonate Buffer Concentration CV Fed (%)	34.4
		Abundance: SLCO1B3 (OATP1B3) PT Mean	0					Ileum I Luminal Fluid Velocity Fasted (m/s)	0.0013
		Abundance: SLCO1B3 (OATP1B3) PT CV (%)	0					Ileum I Luminal Fluid Velocity CV Fasted (%)	56
		Abundance: SLCO1B3 (OATP1B3) IT Mean	0					Ileum I Luminal Fluid Velocity Fed (m/s)	0.0013
		Abundance: SLCO1B3 (OATP1B3) IT CV (%)	0					Ileum I Luminal Fluid Velocity CV Fed (%)	56
		Abundance: SLCO1B3 (OATP1B3) UT Mean	0					Ileum I CMC fasted (mM)	1
		Abundance: SLCO1B3 (OATP1B3) UT CV (%)	0					Ileum I CMC fed (mM)	1
		Abundance: SLC22A1 (OCT1) ET Mean	1					Ileum I Bile fasted (mM)	1.25
		Abundance: SLC22A1 (OCT1) ET CV (%)	90					Ileum I Bile fasted CV	30
		Abundance: SLC22A1 (OCT1) PT Mean	0					Ileum I Bile fed (mM)	5.86
		Abundance: SLC22A1 (OCT1) PT CV (%)	0					Ileum I Bile fed CV	84
		Abundance: SLC22A1 (OCT1) IT Mean	0					Ileum I Channel Depth Mean (µm)	289.94
		Abundance: SLC22A1 (OCT1) IT CV (%)	0					Ileum I Channel Depth CV (%)	49.37
		Abundance: SLC22A1 (OCT1) UT Mean	0					Ileum I Channel Width Mean (µm)	56.19
		Abundance: SLC22A1 (OCT1) UT CV (%)	0					Ileum I Channel Width CV (%)	30
								Ileum I Mean Thickness Mean (µm)	127
								Ileum I Mean Thickness CV (%)	30
								Ileum I Fold Expansion Mean	1.1
								Ileum I Fold Expansion CV (%)	9.15
								Ileum I Pore Radius Mean	8.6
								Ileum I Pore Radius CV (%)	0
								Ileum I Unstirred Layer Thickness Mean (µm)	480
								Ileum I Unstirred Layer Thickness CV (%)	10
								Ileum I Unstirred Layer pH	6.5
								Ileum I Unstirred Layer CV (%)	0.5
								Ileum I ABCB1 (P-gp)/cm² (Relative values)	1.5
								Ileum I ABCC2 (MRP2)/cm² (Relative values)	0.6
								Ileum I ABCG2 (BCRP)/cm² (Relative values)	0.59
								Ileum I Apical Influx/cm² (Relative values)	1
								Ileum II Blood Flow (Qvilli %)	10.7
								Ileum II Transit Time (% Total)	15.2
								Ileum II CYP3A (% Total)	7.94
								Ileum II S9PPI (% Total)	7.83
								Ileum II MPPI/CYP (% Total)	7.94
								Ileum II CPPI (% Total)	7.83
								Ileum II pH Fasted	7
								Ileum II CV pH Fasted (%)	10
								Ileum II pH Fed	7
								Ileum II CV pH Fed (%)	10
								Ileum II Bicarbonate Buffer Concentration Fasted (mM)	54.14
								Ileum II Bicarbonate Buffer Concentration CV Fasted (%)	34.4
								Ileum II Bicarbonate Buffer Concentration Fed (mM)	54.14
								Ileum II Bicarbonate Buffer Concentration CV Fed (%)	34.4
								Ileum II Luminal Fluid Velocity Fasted (m/s)	0.0013
								Ileum II Luminal Fluid Velocity CV Fasted (%)	56
								Ileum II Luminal Fluid Velocity Fed (m/s)	0.0013
								Ileum II Luminal Fluid Velocity CV Fed (%)	56
								Ileum II CMC fasted (mM)	1
								Ileum II CMC fed (mM)	1
								Ileum II Bile fasted (mM)	1.25
								Ileum II Bile fasted CV	30
								Ileum II Bile fed (mM)	8.61
								Ileum II Bile fed CV	88
								Ileum II Channel Depth Mean (µm)	289.94
								Ileum II Channel Depth CV (%)	49.37
								Ileum II Channel Width Mean (µm)	56.19
								Ileum II Channel Width CV (%)	30
								Ileum II Mean Thickness Mean (µm)	127
								Ileum II Mean Thickness CV (%)	30
								Ileum II Fold Expansion Mean	1.1
								Ileum II Fold Expansion CV (%)	9.15
								Ileum II Pore Radius Mean	8.6
								Ileum II Pore Radius CV (%)	0
								Ileum II Unstirred Layer Thickness Mean (µm)	480
								Ileum II Unstirred Layer Thickness CV (%)	10
								Ileum II Unstirred Layer pH	6.5
								Ileum II Unstirred Layer CV (%)	0.5
								Ileum II ABCB1 (P-gp)/cm² (Relative values)	1.51
								Ileum II ABCC2 (MRP2)/cm² (Relative values)	0.6
								Ileum II ABCG2 (BCRP)/cm² (Relative values)	0.59
								Ileum II Apical Influx/cm² (Relative values)	1
								Ileum III Blood Flow (Qvilli %)	10.7
								Ileum III Transit Time (% Total)	15.2
								Ileum III CYP3A (% Total)	7.94
								Ileum III S9PPI (% Total)	7.83
								Ileum III MPPI/CYP (% Total)	7.94
								Ileum III CPPI (% Total)	7.83
								Ileum III pH Fasted	7.1
								Ileum III CV pH Fasted (%)	7
								Ileum III pH Fed	7.1
								Ileum III CV pH Fed (%)	7
								Ileum III Bicarbonate Buffer Concentration Fasted (mM)	54.14
								Ileum III Bicarbonate Buffer Concentration CV Fasted (%)	34.4
								Ileum III Bicarbonate Buffer Concentration Fed (mM)	54.14
								Ileum III Bicarbonate Buffer Concentration CV Fed (%)	34.4
								Ileum III Luminal Fluid Velocity Fasted (m/s)	0.0013
								Ileum III Luminal Fluid Velocity CV Fasted (%)	56
								Ileum III Luminal Fluid Velocity Fed (m/s)	0.0013
								Ileum III Luminal Fluid Velocity CV Fed (%)	56
								Ileum III CMC fasted (mM)	1
								Ileum III CMC fed (mM)	1
								Ileum III Bile fasted (mM)	1.25
								Ileum III Bile fasted CV	30
								Ileum III Bile fed (mM)	8.06
								Ileum III Bile fed CV	65
								Ileum III Channel Depth Mean (µm)	289.94
								Ileum III Channel Depth CV (%)	49.37
								Ileum III Channel Width Mean (µm)	56.19
								Ileum III Channel Width CV (%)	30
								Ileum III Mean Thickness Mean (µm)	127
								Ileum III Mean Thickness CV (%)	30
								Ileum III Fold Expansion Mean	1.08
								Ileum III Fold Expansion CV (%)	16.07
								Ileum III Pore Radius Mean	8.6
								Ileum III Pore Radius CV (%)	0
								Ileum III Unstirred Layer Thickness Mean (µm)	480
								Ileum III Unstirred Layer Thickness CV (%)	10
								Ileum III Unstirred Layer pH	6.5
								Ileum III Unstirred Layer CV (%)	0.5
								Ileum III ABCB1 (P-gp)/cm² (Relative values)	1.52
								Ileum III ABCC2 (MRP2)/cm² (Relative values)	0.6
								Ileum III ABCG2 (BCRP)/cm² (Relative values)	0.59
								Ileum III Apical Influx/cm² (Relative values)	1
								Ileum IV Blood Flow (Qvilli %)	10.7
								Ileum IV Transit Time (% Total)	15.2
								Ileum IV CYP3A (% Total)	7.94
								Ileum IV S9PPI (% Total)	7.83
								Ileum IV MPPI/CYP (% Total)	7.94
								Ileum IV CPPI (% Total)	7.83
								Ileum IV pH Fasted	7.3
								Ileum IV CV pH Fasted (%)	6
								Ileum IV pH Fed	7.3
								Ileum IV CV pH Fed (%)	6
								Ileum IV Bicarbonate Buffer Concentration Fasted (mM)	54.14
								Ileum IV Bicarbonate Buffer Concentration CV Fasted (%)	34.4
								Ileum IV Bicarbonate Buffer Concentration Fed (mM)	54.14
								Ileum IV Bicarbonate Buffer Concentration CV Fed (%)	34.4
								Ileum IV Luminal Fluid Velocity Fasted (m/s)	0.0013
								Ileum IV Luminal Fluid Velocity CV Fasted (%)	56
								Ileum IV Luminal Fluid Velocity Fed (m/s)	0.0013
								Ileum IV Luminal Fluid Velocity CV Fed (%)	56
								Ileum IV CMC fasted (mM)	1
								Ileum IV CMC fed (mM)	1
								Ileum IV Bile fasted (mM)	1.25
								Ileum IV Bile fasted CV	30
								Ileum IV Bile fed (mM)	5.96
								Ileum IV Bile fed CV	65
								Ileum IV Channel Depth Mean (µm)	289.94
								Ileum IV Channel Depth CV (%)	49.37
								Ileum IV Channel Width Mean (µm)	56.19
								Ileum IV Channel Width CV (%)	30
								Ileum IV Mean Thickness Mean (µm)	127
								Ileum IV Mean Thickness CV (%)	30
								Ileum IV Fold Expansion Mean	1.04
								Ileum IV Fold Expansion CV (%)	12.4
								Ileum IV Pore Radius Mean	8.6
								Ileum IV Pore Radius CV (%)	0
								Ileum IV Unstirred Layer Thickness Mean (µm)	480
								Ileum IV Unstirred Layer Thickness CV (%)	10
								Ileum IV Unstirred Layer pH	6.5
								Ileum IV Unstirred Layer CV (%)	0.5
								Ileum IV ABCB1 (P-gp)/cm² (Relative values)	1.51
								Ileum IV ABCC2 (MRP2)/cm² (Relative values)	0.6
								Ileum IV ABCG2 (BCRP)/cm² (Relative values)	0.59
								Ileum IV Apical Influx/cm² (Relative values)	1
								Colon pH Fasted	6.5
								Colon CV pH Fasted (%)	15
								Colon pH Fed	6.5
								Colon CV pH Fed (%)	15
								Colon Bicarbonate Buffer Concentration Fasted (mM)	54.14
								Colon Bicarbonate Buffer Concentration CV Fasted (%)	34.4
								Colon Bicarbonate Buffer Concentration Fed (mM)	54.14
								Colon Bicarbonate Buffer Concentration CV Fed (%)	34.4
								Colon Luminal Fluid Velocity Fasted (m/s)	0.0013
								Colon Luminal Fluid Velocity CV Fasted (%)	56
								Colon Luminal Fluid Velocity Fed (m/s)	0.0013
								Colon Luminal Fluid Velocity CV Fed (%)	56
								Colon CMC fasted (mM)	1
								Colon CMC fed (mM)	1
								Colon Bile fasted (mM)	0.6
								Colon Bile fasted CV	50
								Colon Bile fed (mM)	0.6
								Colon Bile fed CV	50
								Colon Fold Expansion Mean	1
								Colon Fold Expansion CV (%)	0
								Colon Pore Radius Mean	8.6
								Colon Pore Radius CV (%)	0
								Colon Unstirred Layer Thickness Mean (µm)	830
								Colon Unstirred Layer Thickness CV (%)	13
								Colon Unstirred Layer pH	6.5
								Colon Unstirred Layer CV (%)	0.5
								Colon ABCB1 (P-gp)/cm² (Relative values)	0.57
								Colon ABCC2 (MRP2)/cm² (Relative values)	0.02
								Colon ABCG2 (BCRP)/cm² (Relative values)	0.13
								Colon Apical Influx/cm² (Relative values)	1
								Abundance: ABCB1 (P-gp) ET Mean	1
								Abundance: ABCB1 (P-gp) ET CV (%)	65
								Abundance: ABCB1 (P-gp) PT Mean	0
								Abundance: ABCB1 (P-gp) PT CV (%)	0
								Abundance: ABCB1 (P-gp) IT Mean	0
								Abundance: ABCB1 (P-gp) IT CV (%)	0
								Abundance: ABCB1 (P-gp) UT Mean	0
								Abundance: ABCB1 (P-gp) UT CV (%)	0
								Abundance: ABCC2 (MRP2) ET Mean	1
								Abundance: ABCC2 (MRP2) ET CV (%)	79
								Abundance: ABCC2 (MRP2) PT Mean	0
								Abundance: ABCC2 (MRP2) PT CV (%)	0
								Abundance: ABCC2 (MRP2) IT Mean	0
								Abundance: ABCC2 (MRP2) IT CV (%)	0
								Abundance: ABCC2 (MRP2) UT Mean	0
								Abundance: ABCC2 (MRP2) UT CV (%)	0
								Abundance: ABCG2 (BCRP) ET Mean	1
								Abundance: ABCG2 (BCRP) ET CV (%)	63
								Abundance: ABCG2 (BCRP) PT Mean	0
								Abundance: ABCG2 (BCRP) PT CV (%)	0
								Abundance: ABCG2 (BCRP) IT Mean	0
								Abundance: ABCG2 (BCRP) IT CV (%)	0
								Abundance: ABCG2 (BCRP) UT Mean	0
								Abundance: ABCG2 (BCRP) UT CV (%)	0
								Abundance: Apical Influx ET Mean	1
								Abundance: Apical Influx ET CV (%)	0
								Abundance: Apical Influx PT Mean	0
								Abundance: Apical Influx PT CV (%)	0
								Abundance: Apical Influx IT Mean	0
								Abundance: Apical Influx IT CV (%)	0
								Abundance: Apical Influx UT Mean	0
								Abundance: Apical Influx UT CV (%)	0
								Fasted Mean gastric emptying time (h)	0.4
								Fasted CV gastric emptying time (%)	38
								Fed Mean gastric emptying time (h)	1
								Fed CV gastric emptying time (%)	38
								Weibull Dist of transit time - alpha	2.92
								Weibull Dist of transit time - beta	4.04
								Mean colon transit time (h)	12
								CV colon transit time (%)	30
								Initial volume of stomach fluid (mL) - Fed	1000
								Initial volume of stomach fluid CV (%) - Fed	30
								Initial volume of stomach fluid (mL) - Fasted	50
								Initial volume of stomach fluid CV (%) - Fasted	30
								Mean SITT (h)	3.33873
								Ionic Product (Kw) (10⁻¹⁴ mol²/dm⁶)	2.4
								Aqueous Diffusion Coefficients H⁺ (10⁻⁴ cm²/min)	62.94
								Aqueous Diffusion Coefficients OH⁻ (10⁻⁴ cm²/min)	37.8
								Water Concentration (mM)	55560
								Bicarbonate pKa 1	6.05
								Bicarbonate pKa 2	9.79
								Aqueous Diffusion Coefficients 37°C (10⁻⁴ cm²/min) H₂CO₃	17.72
								Aqueous Diffusion Coefficients 37°C (10⁻⁴ cm²/min) HCO₃⁻	9.85
								Aqueous Diffusion Coefficients 37°C (10⁻⁴ cm²/min) CO₃²⁻	6.98

## Sheet: Demographic Data
Index	Population	Trial	Sex	Sex Code	Age (Years)	Weight (kg)	Height (cm)	BSA (m²)	Brain Weight (g)	Kidney Weight (g)	Liver Weight (g)	BMI (kg/m²)	Cardiac Output (L/h)	Haematocrit (%)	HSA (g/L)	AGP (g/L)	Other (µM)	Serum Creatinine (µmol/L)	GFR (mL/min/1.73m²)	Renal Function	Allometric Scalar	Simulation Duration
1	0	1	F	0	32.3897	79.1094	157.317	1.80209	1061.54	415.962	1440.81	31.965	310.98	39.1209	42.1261	0.839701	0	36.75	232.214	1.78626	1	1.28538
2	0	1	F	0	32.6963	120.015	162.751	2.20494	1047.24	381.811	1984.14	45.3096	380.092	37.7221	38.3321	0.647678	0	55.084	191.544	1.47342	1	0.745013
3	0	1	F	0	20.7041	70.4513	170.922	1.82179	1460.7	349.825	1504.63	24.1153	327.152	40.3844	46.1043	0.706719	0	62.0701	134.269	1.03284	1	1.83094
4	0	1	F	0	23.7096	58.135	163.443	1.62534	1070.07	320.015	1261.35	21.7622	288.943	37.9048	42.8056	0.98956	0	75.7665	99.1748	0.762883	1	0.721788
5	0	1	F	0	21.9427	45.2477	160.095	1.43936	1345.71	297.925	1056.21	17.6539	257.407	36.8195	49.2695	0.562756	0	82.8214	80.9502	0.622694	1	0.892365
6	0	1	F	0	47.2637	73.8854	154.076	1.7243	1768.31	298.194	1273.55	31.1234	282.167	33.5654	40.5882	0.855881	0	48.1486	149.092	1.14686	1	0.656146
7	0	1	M	1	34.4141	61.3897	170.528	1.71538	1143.84	309.947	1419.67	21.1107	293.933	40.1217	45.7891	0.961432	0	68.6756	116.939	0.974495	1	0.44257
8	0	1	F	0	26.0058	82.7046	159.983	1.85896	1250.61	312.777	1881.15	32.3134	327.914	38.4879	44.3202	0.82336	0	38.5477	237.675	1.82827	1	1.10008
9	0	1	M	1	42.4456	100.87	178.427	2.18914	1176.4	335.084	2237.19	31.684	364.564	42.476	43.5343	0.850062	0	79.3186	120.443	1.00369	1	1.01695
10	0	1	M	1	25.2605	76.0529	179.476	1.94982	1164.2	305.881	1588.07	23.6103	344.814	41.7323	40.6689	1.0242	0	68.5701	138.714	1.15595	1	0.227277
11	0	1	F	0	39.8229	65.7126	156.278	1.65746	1268.24	204.153	1104.65	26.9064	278.629	36.8552	45.321	0.692709	0	66.1213	108.511	0.8347	1	0.444943
12	0	1	F	0	24.0392	71.7328	157.518	1.73026	1104.54	258.691	1670.24	28.9105	307.254	39.6508	43.3835	1.03891	0	58.1695	149.301	1.14847	1	0.227685
13	0	1	F	0	23.173	64.9242	158.302	1.66443	1230.42	348.261	1743.98	25.908	296.429	37.0692	44.3624	0.889912	0	54.2957	151.621	1.16631	1	0.372856
14	0	1	M	1	20.4068	68.9091	179.119	1.86708	1322.98	294.208	1580.61	21.4779	335.618	40.1604	54.2943	1.02494	0	98.9656	94.7891	0.789909	1	0.466265
15	0	1	M	1	35.9713	61.8582	179.958	1.78941	1694.64	460.89	1519.43	19.1008	304.947	44.0195	53.8506	0.803874	0	73.2646	104.32	0.869334	1	0.941248
16	0	1	F	0	41.7063	72.2082	165.207	1.79612	1653.76	446.552	2047.65	26.4565	299.909	41.8012	51.3142	0.704497	0	76.7535	93.0078	0.715445	1	0.425303
17	0	1	F	0	48.591	59.3656	169.592	1.68437	1181.96	320.063	1499.93	20.6408	274.292	38.1099	52.208	0.782406	0	73.1919	79.5178	0.611675	1	0.654301
18	0	1	M	1	25.1586	77.2163	178.466	1.95443	1461.87	274.317	1953.48	24.2436	345.749	43.7248	53.1918	0.944021	0	65.5794	147.042	1.22535	1	0.494707
19	0	1	F	0	26.2306	67.4466	164.148	1.73668	1515.14	247.574	1498.24	25.0315	306.111	40.1668	39.4547	0.611405	0	72.8078	109.629	0.843304	1	0.948709
20	0	1	M	1	21.6606	75.8125	176.873	1.92668	1533.48	366.734	1837.97	24.2336	344.883	42.1847	45.6831	0.585892	0	87.4658	113.147	0.942891	1	0.65854
21	0	1	F	0	28.4505	58.1578	166.042	1.64431	1040	286.741	1371.73	21.0946	287.638	35.7634	44.2639	0.668435	0	68.1323	104.612	0.804706	1	0.56662
22	0	1	F	0	25.6631	72.9222	167.203	1.81942	1228.28	220.249	1477	26.0839	321.314	38.2204	38.7263	0.979308	0	54.5855	151.662	1.16663	1	0.536272
23	0	1	M	1	23.7143	94.8138	185.437	2.1927	1256.38	505.997	1946.3	27.5726	389.8	49.2762	43.6686	0.524982	0	85.0018	125.722	1.04768	1	0.480372
24	0	1	F	0	28.2879	46.6524	155.354	1.42675	1046.73	413.916	1052.44	19.3298	249.72	39.6275	39.4465	0.944881	0	79.9809	82.5052	0.634656	1	0.463658
25	0	1	F	0	24.6075	59.7169	153.171	1.56841	1421.46	222.063	1195.22	25.4533	277.979	36.2121	42.1476	0.712616	0	55.7555	142.353	1.09502	1	0.514485
26	0	1	F	0	20.0911	63.8441	151.639	1.60188	1212.56	433.334	1411.48	27.7652	288.251	35.6711	52.1962	0.799452	0	47.3842	182.2	1.40154	1	1.32058
27	0	1	F	0	31.3371	62.5615	164.955	1.68805	1143.58	190.764	1768.6	22.992	292.367	39.697	39.4675	0.930548	0	74.6077	97.5121	0.750093	1	0.697778
28	0	1	F	0	28.3033	72.6714	163.586	1.78818	1321.17	298.804	1423.52	27.1564	312.964	39.6678	45.9654	0.819574	0	57.5493	142.493	1.0961	1	0.626655
29	0	1	F	0	20.1465	79.4826	163.493	1.85682	1277.01	246.665	1756.31	29.7353	334.064	40.5732	39.9929	0.559504	0	50.1146	184.939	1.42261	1	0.495846
30	0	1	M	1	28.604	83.7014	168.597	1.94086	1497.25	292.928	1514.25	29.4463	339.335	45.6256	44.8052	0.546012	0	59.9883	170.201	1.41834	1	0.294602
31	0	1	F	0	34.0741	65.7347	166.791	1.73781	1156.13	369.046	1374.25	23.6293	298.132	34.5303	42.1378	1.01165	0	81.969	88.3048	0.679268	1	0.405601
32	0	1	F	0	26.102	58.1426	151.614	1.53926	1266.47	228.815	1582.62	25.2938	271.432	37.3514	40.5514	0.715986	0	52.548	147.905	1.13773	1	0.574329
33	0	1	F	0	29.803	68.358	171.163	1.80042	1487.69	285.553	1654.6	23.3331	313.485	36.7563	47.072	0.851031	0	58.7314	128.693	0.98995	1	0.80699
34	0	1	F	0	26.9346	56.3622	163.685	1.60581	1123.22	234.196	1403.64	21.0362	282.364	38.0097	46.1111	0.845282	0	53.0864	135.046	1.03881	1	1.58731
35	0	1	F	0	22.8011	42.3546	157.16	1.38085	1657.71	209.34	1022.13	17.1481	246.233	37.99	39.2176	0.903552	0	40.2618	161.297	1.24074	1	1.39416
36	0	1	M	1	31.3867	88.0269	182.412	2.09938	1383.13	384.931	1945.16	26.455	363.546	43.8236	44.9534	0.99482	0	83.4892	115.931	0.966088	1	0.797566
37	0	1	F	0	48.2533	74.7511	163.423	1.80845	1831.36	242.655	1539.74	27.9892	294.864	37.7224	47.8972	0.861007	0	110.582	61.9521	0.476555	1	0.402437
38	0	1	F	0	22.0296	58.0378	160.749	1.60472	1778.95	262.708	1481.94	22.4604	286.896	35.8483	40.6751	0.645616	0	66.8171	115.355	0.887346	1	1.69798
39	0	1	M	1	26.9251	76.0799	178.994	1.94632	1303.75	276.273	1654.69	23.746	342.251	40.3288	36.3385	0.987775	0	84.98	110.542	0.921181	1	0.818591
40	0	1	F	0	20.7361	73.63	165.53	1.81364	1053.83	306.281	1456.54	26.8721	325.654	38.6805	40.4764	0.864842	0	32.2358	271.341	2.08724	1	1.11777
41	0	1	F	0	28.0948	43.5913	153.398	1.3735	1389.9	196.64	1201.23	18.5252	240.56	39.4265	48.0553	0.867599	0	46.0919	139.199	1.07076	1	0.551218
42	0	1	F	0	47.9459	72.9472	169.768	1.83988	1280.78	244.418	1768.56	25.3104	300.328	40.4638	40.7489	0.648483	0	61.1919	107.748	0.828829	1	0.781518
43	0	1	M	1	21.8193	62.859	169.292	1.72359	1057.51	390.728	1490.92	21.9328	308.365	39.6379	51.2665	0.869271	0	79.5427	115.16	0.959665	1	0.833843
44	0	1	M	1	32.1875	82.2602	173.018	1.96308	1145.76	387	1641.01	27.4793	339	35.7476	38.5136	0.887004	0	77.8443	123.343	1.02786	1	0.687222
45	0	1	M	1	29.7191	90.5363	180.63	2.10955	1554.26	296.991	1820.26	27.7486	367.417	39.6517	43.3657	0.722888	0	92.2663	109.022	0.908513	1	0.679486
46	0	1	M	1	25.8143	79.049	171.166	1.91514	1121.46	254.801	1418.73	26.9813	338.043	42.4349	46.1847	0.628981	0	122.951	81.4701	0.678918	1	1.25474
47	0	1	F	0	21.1051	56.0351	162.835	1.5958	1517.34	243.64	1494.28	21.1332	286.186	38.7785	44.364	0.726577	0	62.2323	121.191	0.932236	1	0.637139
48	0	1	F	0	40.5048	65.1479	164.464	1.71366	1545.19	255.816	1437.79	24.0857	287.376	41.5894	42.9379	0.83343	0	67.9954	100.494	0.773028	1	0.507074
49	0	1	F	0	46.621	82.9417	179.639	2.02435	1487.91	263.286	2042.57	25.7022	332.049	39.5844	54.6702	0.827698	0	60.1617	114.883	0.883719	1	0.663705
50	0	1	F	0	20.6321	74.9833	175.772	1.90904	1198.62	284.319	1707.85	24.2697	342.904	42.0561	43.9259	0.598316	0	55.0058	153.982	1.18447	1	0.636321
51	0	1	F	0	26.165	67.2861	166.096	1.74982	1120.82	393.03	1704.04	24.3898	308.496	35.5725	52.0231	0.610266	0	44.1269	179.202	1.37848	1	0.493075
52	0	1	M	1	32.4483	58.649	172.263	1.69479	1152.19	258.833	1273.02	19.7641	292.404	40.0625	50.175	0.736653	0	66.0863	119.694	0.99745	1	0.509815
53	0	1	F	0	26.6757	57.5585	162.85	1.6142	1225.7	358.186	1340.97	21.7038	284.091	36.5418	40.8034	0.850636	0	54.8747	133.028	1.02329	1	0.868779
54	0	1	M	1	38.8855	89.4818	174.786	2.04961	1844.87	363.084	2078.65	29.29	345.705	47.2504	51.7076	0.672689	0	85.9619	109.142	0.909518	1	0.971868
55	0	1	M	1	39.4234	76.4271	172.351	1.89734	1100.03	363.393	2221.24	25.729	319.41	42.057	50.7498	0.669856	0	93.2052	92.3804	0.769837	1	0.598664
56	0	1	M	1	24.5777	64.5503	186.342	1.86874	1110.84	340.034	1807.12	18.5898	331.241	39.4852	53.0967	0.764767	0	78.4018	108.077	0.900644	1	0.565123
57	0	1	F	0	25.3762	65.2896	160.06	1.68182	1141.56	223.497	1418.81	25.4846	297.303	36.7162	46.2952	0.620618	0	52.0664	154.391	1.18762	1	0.709086
58	0	1	F	0	27.2455	66.5872	159.922	1.69488	1306.21	355.167	1712.41	26.0361	297.711	36.5726	47.2952	0.930812	0	60.1422	133.06	1.02354	1	1.15142
59	0	1	M	1	31.117	74.5502	175.152	1.89947	1451.11	276.111	1725.15	24.3008	329.234	43.4178	45.1951	1.10674	0	71.7822	126.527	1.05439	1	0.757273
60	0	1	M	1	20.8061	83.8282	176.993	2.01176	1245.82	336.924	1797.43	26.7594	361.144	41.3394	58.7903	0.847141	0	70.1385	150.499	1.25416	1	0.557362
61	0	1	M	1	20.3768	111.311	170.163	2.20557	1189.48	486.972	2025.67	38.4423	396.505	44.7092	51.941	0.860818	0	83.3047	154.022	1.28352	1	1.22333
62	0	1	F	0	31.1529	69.9684	160.467	1.73522	1202.18	236.993	1498.55	27.1725	300.728	32.6708	41.1171	0.927627	0	60.1048	131.915	1.01473	1	0.384179
63	0	1	F	0	20.9219	63.6033	167.731	1.72064	1451.93	294.217	1582.43	22.6074	308.764	42.4386	47.6975	0.862692	0	63.7294	124.773	0.959794	1	0.342788
64	0	1	F	0	27.7755	57.4922	154.076	1.54992	1213.95	231.553	937.002	24.2179	271.754	40.6266	38.5215	0.95645	0	74.1717	101.389	0.779914	1	1.55024
65	0	1	F	0	21.6749	73.0975	150.567	1.68802	1071.58	291.344	1423.46	32.2437	302.148	39.3683	45.5411	1.11463	0	51.6216	179.312	1.37932	1	0.71279
66	0	1	F	0	42.7858	54.8523	165.422	1.59957	1073.43	395.42	1151.39	20.0451	266.055	37.921	45.1724	0.689384	0	61.5191	97.8929	0.753022	1	0.269726
67	0	1	F	0	36.0285	61.1249	169.972	1.70818	1499.8	275.298	1354.45	21.1574	291.044	39.4555	42.0388	0.795512	0	50.2313	133.803	1.02925	1	0.606046
68	0	1	M	1	42.9589	76.8277	167.055	1.85902	1182.01	191.943	1431.31	27.5295	309.015	42.9908	42.9329	0.834262	0	70.9985	120.05	1.00041	1	0.540255
69	0	1	F	0	28.7369	63.9107	160.264	1.66818	1293.18	237.784	1630.04	24.8828	291.527	41.9118	41.9884	0.934035	0	43.7827	175.882	1.35294	1	0.385174
70	0	1	F	0	28.5186	98.2825	172.091	2.10908	1040	333.725	1987.52	33.1865	368.855	37.9642	40.48	0.879246	0	46.9862	199.736	1.53643	1	0.469195
71	0	1	F	0	26.7674	48.7039	166.886	1.53051	1137.76	248.053	1123.28	17.4873	269.277	37.0435	45.5939	0.852657	0	46.5321	139.89	1.07608	1	0.518029
72	0	1	F	0	35.5429	51.5583	171.559	1.59972	1364.04	215.594	1398.35	17.5175	273.03	36.2662	39.7667	0.736334	0	48.22	126.127	0.970205	1	0.885308
73	0	1	M	1	24.2719	84.1981	185.248	2.08325	1753.39	348.501	1885.76	24.5356	369.645	45.8456	40.8655	1.02545	0	73.7092	134.865	1.12388	1	0.30467
74	0	1	M	1	34.6617	54.1928	168.44	1.61237	1555.98	184.69	1417.74	19.1008	276.043	39.8204	44.2667	0.91786	0	94.767	79.4014	0.661678	1	0.25856
75	0	1	M	1	22.253	109.064	186.806	2.33959	1834.76	407.023	2379.51	31.2536	417.964	44.5462	46.9084	0.570896	0	66.6404	175.056	1.4588	1	0.470687
76	0	1	M	1	26.0099	73.0079	173.878	1.87273	1183.3	204.346	1654.18	24.1481	330.339	46.9053	46.9515	1.06669	0	70.0791	134.771	1.12309	1	0.651403
77	0	1	F	0	34.6714	55.685	156.768	1.54834	1118.97	193.749	1228.02	22.658	265.072	37.5841	40.5417	0.844291	0	43.4654	157.44	1.21107	1	0.423723
78	0	1	F	0	39.2855	57.7385	169.053	1.66076	1498.3	198.134	1407.93	20.2031	279.719	37.898	38.366	0.967635	0	74.9371	84.4102	0.649309	1	0.73907
79	0	1	F	0	27.839	50.7484	168.484	1.56829	1379.71	271.438	1295.23	17.8775	274.915	35.295	45.2921	0.643726	0	54.8013	119.643	0.920334	1	1.63399
80	0	1	M	1	32.92	86.6668	175.056	2.02422	1349.01	296.891	1673.08	28.2812	348.668	41.8477	48.0447	0.810792	0	88.1785	110.5	0.920834	1	1.52331
81	0	1	M	1	36.0456	66.1206	163.895	1.72017	1809.47	276.697	1445.45	24.6152	293.069	42.2178	46.688	0.934762	0	62.4211	136.05	1.13375	1	0.331766
82	0	1	M	1	20.1105	63.9847	158.796	1.6579	1331.36	226.659	1715.24	25.3745	298.312	39.7398	45.397	0.888578	0	71.7882	136.983	1.14153	1	0.635073
83	0	1	M	1	35.6463	95.1012	184.231	2.18516	1254.64	312.631	1855.8	28.0196	372.815	42.6321	43.4279	0.788592	0	72.0276	134.009	1.11674	1	0.461513
84	0	1	F	0	25.696	78.2495	162.729	1.83827	1495.77	281.178	1743.68	29.5496	324.605	39.2604	41.0571	0.928182	0	56.7466	154.894	1.19149	1	0.486538
85	0	1	M	1	42.5763	74.4207	170.122	1.85839	1829.06	236.489	1214.43	25.7143	309.337	37.5275	40.0369	0.866094	0	79.6319	104.125	0.867711	1	0.521146
86	0	1	M	1	37.5718	89.5975	185.98	2.14514	1484.78	514.931	1809.04	25.9037	363.509	44.6518	44.1809	0.824556	0	73.8716	123.085	1.02571	1	0.548981
87	0	1	F	0	27.2262	73.0066	155.5	1.72703	1421.4	309.136	1451.22	30.1928	303.377	40.4291	48.4645	0.652868	0	59.2204	145.426	1.11866	1	1.67442
88	0	1	M	1	44.5407	100.771	183.678	2.23473	1400.36	602.111	2365.43	29.8691	369.346	42.7701	39.7572	0.695777	0	93.4357	97.9123	0.815935	1	0.713181
89	0	1	M	1	34.0204	79.026	169.236	1.89923	1565.34	300.131	1790.13	27.5919	325.884	43.0469	38.7844	0.769558	0	94.035	99.6661	0.830551	1	0.515444
90	0	1	M	1	48.1016	81.3611	179.102	2.00351	1305.77	313.344	1717.7	25.3639	326.851	38.4747	44.0331	0.738992	0	71.7798	110.498	0.920814	1	0.570523
91	0	1	F	0	28.9605	73.9355	169.539	1.84863	1141.69	584.907	1764.52	25.7226	322.814	41.6481	40.3538	0.701312	0	69.0996	116.104	0.893106	1	0.687424
92	0	1	M	1	32.0574	75.9608	180.104	1.95376	1490.5	295.286	1690.92	23.4176	337.543	44.3843	43.0486	0.766892	0	69.2116	128.87	1.07392	1	0.433282
93	0	1	M	1	24.7699	73.2824	184.83	1.96065	1378.71	457.049	1610.99	21.4515	347.306	46.0876	49.3113	0.550246	0	83.4188	109.729	0.914411	1	0.329101
94	0	1	F	0	33.7432	75.7978	180.901	1.95824	1072	284.821	1575	23.1618	336.336	39.3673	51.6558	0.677911	0	44.923	165.394	1.27226	1	0.798348
95	0	1	F	0	27.6055	84.0983	166.008	1.92307	1160	369.683	1584.47	30.5161	337.377	34.8987	43.611	0.754944	0	78.5638	113.02	0.869385	1	0.597432
96	0	1	M	1	32.2413	67.694	182.329	1.87703	1772.49	368.363	1528.06	20.3628	324.079	41.9918	50.2904	0.979194	0	99.8398	82.7274	0.689395	1	1.12865
97	0	1	F	0	22.9416	60.8582	159.626	1.62912	1219.56	340.388	1295.95	23.8841	290.366	45.3527	46.5225	0.753929	0	50.2189	157.305	1.21004	1	0.783592
98	0	1	M	1	28.4453	76.0198	175.368	1.91701	1506.23	539.786	1446.28	24.7188	335.347	43.9188	43.0934	1.13394	0	80.7944	116.367	0.969728	1	0.542779
99	0	1	M	1	33.1909	100.098	178.731	2.1847	1315.38	374.014	2275.65	31.3346	375.956	47.6108	50.2134	0.705995	0	79.7011	130.496	1.08747	1	0.763193
100	0	1	M	1	31.1205	71.05	171.867	1.83567	1221.5	299.137	1587.18	24.0537	318.173	41.2837	45.2517	0.803476	0	61.605	145.385	1.21155	1	0.612654

## Sheet: Drug-Population Parameters
Index	Trial	BP (Sub)	fu (Sub)	% Bound to LPP (Sub)	Qgut (Sub) (L/h)	Dose (Sub) (mg)		Statistics
1	1	0.672253	0.0266601	0	8.89089	40			BP (Sub)	fu (Sub)	% Bound to LPP (Sub)	Qgut (Sub) (L/h)	Dose (Sub) (mg)
2	1	0.683973	0.0292217	0	9.86671	40		Mean	0.663863	0.0252781	0	9.90435	40
3	1	0.661669	0.0244158	0	12.09	40		Median	0.66755	0.025362	0	9.76633	40
4	1	0.682442	0.026248	0	10.1722	40		Geometric Mean	0.663289	0.0251616	n/a	9.70432	40
5	1	0.691534	0.0228832	0	6.33821	40		95% Confidence interval around the geometric mean (lower limit)	0.657856	0.0246869	n/a	9.32589	40
6	1	0.718797	0.0276423	0	10.4433	40		95% Confidence interval around the geometric mean (upper limit)	0.668766	0.0256455	n/a	10.0981	40
7	1	0.663869	0.0245798	0	9.19875	40		5th centile	0.615814	0.021267	0	7.26053	40
8	1	0.677557	0.0253737	0	15.0621	40		95th centile	0.702098	0.0289403	0	13.5513	40
9	1	0.644146	0.02582	0	11.7616	40		Skewness	-0.35055	-0.172239	n/a	0.54179	n/a
10	1	0.650376	0.027589	0	8.62889	40		cv	0.0415791	0.0955444	n/a	0.204792	0
11	1	0.691236	0.0248273	0	10.3653	40		Min Val	0.587175	0.0192487	0	5.86721	40
12	1	0.667815	0.0259074	0	10.4417	40		Max Val	0.726291	0.0307755	0	15.5507	40
13	1	0.689442	0.0253502	0	9.77073	40		Fold	1.23692	1.59883	n/a	2.65044	1
14	1	0.663545	0.0208095	0	10.4646	40		Std Dev	0.0276028	0.00241518	0	2.02833	0
15	1	0.631214	0.0209773	0	7.27282	40
16	1	0.649799	0.0219914	0	9.18381	40
17	1	0.680724	0.0216231	0	8.51392	40
18	1	0.633683	0.0212316	0	10.6971	40
19	1	0.663492	0.0284139	0	12.6952	40
20	1	0.646586	0.0246354	0	6.64656	40
21	1	0.700382	0.0254052	0	9.36376	40
22	1	0.679798	0.0289328	0	8.79868	40
23	1	0.587175	0.0257426	0	12.8049	40
24	1	0.668009	0.0284196	0	7.92889	40
25	1	0.696623	0.0266468	0	7.82221	40
26	1	0.701155	0.0216279	0	10.0796	40
27	1	0.667427	0.0284049	0	9.93329	40
28	1	0.667672	0.0244878	0	12.7054	40
29	1	0.660087	0.0280422	0	8.88126	40
30	1	0.617759	0.025106	0	10.2815	40
31	1	0.710712	0.0266528	0	9.8704	40
32	1	0.687079	0.0276667	0	9.21778	40
33	1	0.692064	0.0239259	0	7.64373	40
34	1	0.681563	0.0244123	0	8.15663	40
35	1	0.681728	0.0285808	0	9.09121	40
36	1	0.632856	0.0250253	0	10.9165	40
37	1	0.68397	0.0235234	0	11.3061	40
38	1	0.699671	0.0275849	0	8.57387	40
39	1	0.662135	0.0307755	0	10.0969	40
40	1	0.675943	0.0277166	0	10.5404	40
41	1	0.669693	0.0234478	0	9.74078	40
42	1	0.661003	0.0275363	0	7.55294	40
43	1	0.667922	0.0220114	0	8.81865	40
44	1	0.700514	0.029088	0	11.0978	40
45	1	0.667807	0.0259178	0	7.54781	40
46	1	0.64449	0.0243743	0	8.41413	40
47	1	0.675122	0.0253493	0	7.65501	40
48	1	0.651574	0.0261692	0	7.02715	40
49	1	0.668371	0.0206693	0	11.8216	40
50	1	0.647663	0.0255957	0	14.1061	40
51	1	0.701982	0.0216982	0	8.44876	40
52	1	0.664366	0.0224795	0	6.405	40
53	1	0.693861	0.0275006	0	9.42199	40
54	1	0.604147	0.0218277	0	10.3756	40
55	1	0.647656	0.0222305	0	7.32639	40
56	1	0.669201	0.0212688	0	10.6838	40
57	1	0.6924	0.0243176	0	9.56094	40
58	1	0.693603	0.0238157	0	10.7234	40
59	1	0.636255	0.0248948	0	11.8064	40
60	1	0.653668	0.0192487	0	11.7804	40
61	1	0.625436	0.0217318	0	7.82899	40
62	1	0.726291	0.0272964	0	7.73792	40
63	1	0.644459	0.0236195	0	10.2015	40
64	1	0.659639	0.0290822	0	7.55736	40
65	1	0.670181	0.0247103	0	7.70828	40
66	1	0.682306	0.024907	0	7.63471	40
67	1	0.669451	0.0267139	0	9.76194	40
68	1	0.639832	0.0261721	0	8.48583	40
69	1	0.648873	0.0267451	0	8.17592	40
70	1	0.681944	0.0277142	0	11.5688	40
71	1	0.689657	0.0246824	0	8.02347	40
72	1	0.69617	0.0281972	0	8.87943	40
73	1	0.615916	0.0274599	0	13.5221	40
74	1	0.666394	0.0254036	0	10.0312	40
75	1	0.626802	0.0240073	0	13.4728	40
76	1	0.607038	0.0239858	0	5.86721	40
77	1	0.685129	0.0276731	0	8.5176	40
78	1	0.682499	0.0291966	0	7.3638	40
79	1	0.704307	0.0248428	0	8.48686	40
80	1	0.649409	0.0234529	0	12.1596	40
81	1	0.646308	0.0241179	0	8.93777	40
82	1	0.667069	0.0247868	0	8.03621	40
83	1	0.642837	0.0258816	0	9.8182	40
84	1	0.671085	0.0273352	0	12.2177	40
85	1	0.685603	0.0280122	0	9.70912	40
86	1	0.625917	0.0254517	0	15.5507	40
87	1	0.661294	0.0232544	0	9.63124	40
88	1	0.641682	0.0282038	0	14.711	40
89	1	0.639363	0.0288907	0	14.1735	40
90	1	0.677667	0.025535	0	10.5272	40
91	1	0.651081	0.0277984	0	10.5895	40
92	1	0.628158	0.0261037	0	13.3103	40
93	1	0.613889	0.0228642	0	11.6769	40
94	1	0.67019	0.0218492	0	11.5413	40
95	1	0.707627	0.0257757	0	9.62215	40
96	1	0.648202	0.022429	0	11.5987	40
97	1	0.620045	0.0242017	0	11.1711	40
98	1	0.632058	0.0260772	0	9.27375	40
99	1	0.601127	0.0224627	0	11.4683	40
100	1	0.654134	0.0248644	0	11.0532	40

## Sheet: Enzymatic Status CYPs
		Organ Scalars												Enzyme Abundances ( pmol P450 )																											Enzyme Abundances ( pmol P450 )
Index	Trial	HPGL	MPPGL	CPPGL	S9PPGL	MPPI	CPPGI	S9PPI	PTCPGK	MPPGK	CPPGK	S9PPGK		CYP1A2	PM/EM/IM/UM	CYP2A6	PM/EM/IM/UM	CYP2B6	PM/EM/IM/UM	CYP2C8	PM/EM/IM/UM	CYP2C9	PM/EM/IM/UM	CYP2C18	PM/EM/IM/UM	CYP2C19	PM/EM/IM/UM	CYP2D6	PM/EM/IM/UM	CYP2E1	PM/EM/IM/UM	CYP2J2	PM/EM/IM/UM	CYP3A4	PM/EM/IM/UM	CYP3A5	PM/EM/IM/UM	CYP3A7	PM/EM/IM/UM		Gut CYP2C9	Gut CYP2C19	Gut CYP2D6	Gut CYP2J2	Gut CYP3A4	Gut CYP3A5
1	1	116.442	20.8941	45.8718	66.7659	3222.22	2836.07	6058.29	62.9464	12.5079	0	12.5079		1.62682e+06	EM	72050.6	EM	398248	EM	1.16621e+06	EM	888917	EM	45414.1	EM	664497	EM	270011	EM	1.3928e+06	EM	24364	EM	4.2357e+06	EM	0	PM	0	PM		6395.77	1019.58	518.457	882.125	68461.4	0
2	1	138.371	49.9929	89.0855	139.078	1548.96	1970.44	3519.4	45.3525	10.8529	0	10.8529		2884517	EM	1501877	EM	2.54461e+06	EM	2.29912e+06	EM	7936071	EM	43131.9	EM	977176	EM	446268	EM	8468251	EM	48897.3	EM	27276306	EM	0	PM	0	PM		7366.68	349.545	321.383	269.733	49913.8	0
3	1	84.4119	41.2984	58.6037	99.9022	1910.11	1855.16	3765.26	48.5623	11.5649	0	11.5649		1.71122e+06	EM	1770764	EM	1.02207e+06	EM	377166	EM	2.07268e+06	EM	7380.29	EM	666781	EM	644421	EM	3.43669e+06	EM	231435	EM	7677865	EM	0	PM	0	PM		5170.55	1844.02	579.194	815.369	72141.3	0
4	1	159.387	41.3245	87.0773	128.402	2697.02	2434.36	5131.38	67.0646	10.6497	0	10.6497		1.91306e+06	EM	1893116	EM	1.65316e+06	EM	1.51469e+06	EM	8717424	EM	37776.2	EM	634263	EM	629725	EM	6802143	EM	7907.77	EM	13037765	EM	12030762	EM	0	PM		7279.05	1253.39	325.101	803.072	29147.2	33503.9
5	1	136.385	38.4787	71.8513	110.33	4842.51	2367.07	7209.58	39.0225	11.5889	0	11.5889		4538345	EM	753925	EM	199487	EM	2.31515e+06	EM	2782352	EM	13280	EM	509426	EM	402718	EM	1.80111e+06	EM	30688.7	EM	9299208	EM	0	PM	0	PM		6623.39	1693.96	383.14	355.737	21339.5	0
6	1	111.657	49.2236	97.1517	146.375	2869.1	2699.22	5568.32	61.2904	5.02625	0	5.02625		4235900	EM	267292	EM	2.0236e+06	EM	5184731	EM	2.84316e+06	EM	32183.6	EM	418090	EM	481239	EM	2.53674e+06	EM	43871.3	EM	9114394	EM	0	PM	0	PM		11702.8	1663.98	447.093	695.132	27555.1	0
7	1	105.505	39.0415	79.5974	118.639	2905.08	1490.37	4395.46	52.5982	11.1298	0	11.1298		2.80246e+06	EM	324476	EM	483801	EM	433115	EM	3985229	EM	57404.4	EM	686098	EM	150946	EM	2.19992e+06	EM	17268.8	EM	7893121	EM	0	PM	0	PM		11009.6	1420.13	353.413	798.987	73653.1	0
8	1	86.9537	42.4179	58.1838	100.602	2499.36	1727.62	4226.98	55.7458	5.57464	0	5.57464		6249023	EM	1.44411e+06	EM	701108	EM	271940	EM	7453031	EM	49991.8	EM	1.62895e+06	EM	163251	EM	1489382	EM	269567	EM	6.04285e+06	EM	7257848	EM	0	PM		6456.4	1570.14	364.995	1828.12	20255.5	50541.8
9	1	89.975	30.2463	84.8673	115.114	3547.31	2287.28	5834.6	88.8969	17.8973	0	17.8973		2.78866e+06	EM	6.24819e+06	EM	613013	EM	4245563	EM	8.00618e+06	EM	134719	EM	521601	EM	536530	EM	1.73692e+06	EM	196446	EM	5389208	EM	0	PM	0	PM		9024.66	7330.21	586.793	802.703	28903.8	0
10	1	116.404	34.0718	85.2686	119.34	4383.99	2971.38	7355.37	40.3532	12.7864	0	12.7864		1.26638e+06	EM	238358	EM	672062	EM	1.76961e+06	EM	3.42113e+06	EM	45303.2	EM	404888	EM	587881	EM	2.44799e+06	EM	18732.7	EM	4.17373e+06	EM	0	PM	0	PM		6318.67	2061.24	604.926	577.326	66222.1	0
11	1	96.7605	27.5187	46.3637	73.8824	1902.69	1475.77	3378.46	63.8432	8.18914	0	8.18914		5.74695e+06	EM	629676	EM	191778	PM	812296	EM	1.59455e+06	EM	25317.8	EM	380321	EM	114339	EM	1.37982e+06	EM	7786.76	EM	3.83902e+06	EM	0	PM	0	PM		7777.29	1113.96	674.383	1396.37	91166.4	0
12	1	98.1239	29.4985	62.52	92.0185	4870.42	2320.85	7191.28	42.9093	13.005	0	13.005		2325526	EM	3395444	EM	1.11032e+06	EM	1.24065e+06	EM	2.65129e+06	EM	36461.4	EM	480907	EM	211513	EM	2.63625e+06	EM	51617.9	EM	2.8029e+06	EM	0	PM	0	PM		10595	2062.44	538.386	608.349	137952	0
13	1	117.832	40.1236	82.6986	122.822	4661.66	2240.08	6901.74	47.9558	27.7414	0	27.7414		4240596	EM	4055389	EM	305917	EM	914989	EM	5.21452e+06	EM	23363	EM	724614	EM	638137	EM	2983745	EM	19665.4	EM	4806568	EM	0	PM	0	PM		14469.7	880.83	1723.09	1357.57	65543.3	0
14	1	148.881	39.713	109.918	149.631	2455.25	2936.04	5391.29	82.9875	10.6136	0	10.6136		7057573	EM	1.89642e+06	EM	1.06249e+06	EM	1.29234e+06	EM	5.39234e+06	EM	21260.4	EM	830475	EM	358054	EM	2.42402e+06	EM	38041.4	EM	7693618	EM	6717741	EM	0	PM		9354.46	828.506	314.125	1142.34	102571	43315.9
15	1	106.588	30.9336	54.6874	85.621	3201.35	2715.04	5916.39	47.7438	5.36636	0	5.36636		1.65262e+06	EM	1.72293e+06	EM	542578	EM	1.67594e+06	EM	560238	PM	41334.4	EM	1190602	EM	488551	EM	2146646	EM	1684.97	EM	5.2342e+06	EM	3.94802e+06	EM	0	PM		5427.31	1824.26	438.943	831.275	57267.2	20551
16	1	94.5111	25.1131	63.301	88.4141	2458.01	1551.18	4009.2	38.8668	33.982	0	33.982		4175770	EM	141084	EM	320968	EM	1.20797e+06	EM	3.34222e+06	EM	19171.9	EM	827932	EM	769666	EM	2.98547e+06	EM	32461.6	EM	2.84351e+06	EM	0	PM	0	PM		18193.7	1186.79	449.185	839.095	57016.1	0
17	1	114.732	32.5262	61.3769	93.9031	1976.67	2859.41	4836.08	52.5742	8.49939	0	8.49939		4.02415e+06	EM	177984	EM	2.07527e+06	EM	3.5653e+06	EM	12105618	EM	44633.3	EM	532234	EM	289777	EM	1460812	EM	13275	EM	5.34829e+06	EM	5.16667e+06	EM	0	PM		10817.8	645.791	1092.39	1062.48	45300.1	25598.7
18	1	122.079	63.3313	108.049	171.38	3912.06	2328.33	6240.39	65.3103	5.38145	0	5.38145		7807146	EM	591789	EM	1.00234e+06	EM	1.95793e+06	EM	4737733	EM	21647.3	EM	1.32057e+06	EM	969194	EM	1.78315e+06	EM	45684.7	EM	15343654	EM	0	PM	0	PM		6560.83	1461.97	1329.66	488.605	71100.4	0
19	1	99.7498	18.3905	56.6368	75.0273	3669.91	3179.72	6849.63	47.5826	10.3619	0	10.3619		1.24448e+06	EM	1.45752e+06	EM	2.15765e+06	EM	281131	EM	3.20636e+06	EM	6160.09	EM	343447	EM	223846	EM	2.00696e+06	EM	6855.25	EM	2868032	EM	0	PM	1.07534e+06	EM		12358.8	2478.37	1411.41	3366.31	94918.4	0
20	1	150.259	32.182	75.8717	108.054	2504.97	2881.41	5386.38	59.1382	7.95506	0	7.95506		4.64321e+06	EM	157522	EM	4817354	EM	1.66789e+06	EM	453484	PM	153169	EM	883396	EM	185080	EM	2.73483e+06	EM	50445.2	EM	10487641	EM	0	PM	0	PM		691.371	941.564	1151.7	642.963	12300.3	0
21	1	127.133	27.0887	60.732	87.8208	1941.81	1692.24	3634.05	79.6206	12.2634	0	12.2634		2.0703e+06	EM	768459	EM	560668	EM	588371	EM	4.19671e+06	EM	22541.6	EM	474144	EM	424294	EM	3.19694e+06	EM	69446.6	EM	3014325	EM	0	PM	0	PM		7333.45	672.726	369.744	779.431	26288.6	0
22	1	169.871	28.5448	69.2557	97.8005	4598.26	4371.39	8969.65	47.4934	6.21687	0	6.21687		1.05445e+06	EM	142146	EM	160891	EM	1.26397e+06	EM	2.16187e+06	EM	104204	EM	448523	EM	711770	EM	2.95216e+06	EM	39190.6	EM	6.79493e+06	EM	5.66996e+06	EM	0	PM		3533.29	837.391	571.135	1354.78	31231.2	21636.4
23	1	97.9046	45.5055	93.1782	138.684	3949.95	4139.14	8089.09	95.4007	26.7114	0	26.7114		4496423	EM	1203341	EM	627068	EM	1797431	EM	3007446	EM	497712	EM	716194	EM	676451	EM	3.59741e+06	EM	142874	EM	6.5915e+06	EM	0	PM	0	PM		6733.22	964.519	1241.85	2170.99	46833.9	0
24	1	95.3866	26.4959	56.5287	83.0245	2086	2277.88	4363.88	69.3722	9.61285	0	9.61285		677964	EM	2.21095e+06	EM	429617	EM	580451	EM	1.4855e+06	EM	43850.8	EM	204470	EM	455499	EM	1.4168e+06	EM	57428.4	EM	1.55269e+06	EM	0	PM	0	PM		7192.87	798.03	1086.22	624.651	95226.4	0
25	1	102.812	35.3811	71.4741	106.855	2310.85	2524.99	4835.84	56.1643	8.37695	0	8.37695		2.91686e+06	EM	121401	EM	9216.14	PM	287248	EM	1.29436e+06	EM	52055.8	EM	0	PM	252231	EM	580213	EM	18137.1	EM	3.47195e+06	EM	3.76913e+06	EM	0	PM		25561	0	1361.64	556.324	53855.7	15171.9
26	1	162.248	29.0811	49.2285	78.3096	3340.35	2809.91	6150.26	38.4245	11.9421	0	11.9421		1.12861e+06	EM	557562	EM	178964	EM	1153634	EM	1559253	EM	38466.7	EM	791296	EM	216347	EM	3.45078e+06	EM	11714.8	EM	5695304	EM	0	PM	0	PM		8214.3	1948.45	784.427	770.499	77162.2	0
27	1	143.226	33.5619	70.0347	103.597	2258.38	1741.78	4000.16	58.7566	21.7241	0	21.7241		3350367	EM	1995643	EM	1.21187e+06	EM	2.73177e+06	EM	1.93207e+06	EM	39745.6	EM	790977	EM	777825	EM	2749754	EM	3174.74	EM	8459929	EM	7.86702e+06	EM	0	PM		5446.98	1183.93	1253.45	618.969	169758	15224.5
28	1	130.262	49.8868	90.1321	140.019	1854.59	2824.24	4678.84	35.5879	6.45974	0	6.45974		858253	EM	288523	EM	2.41322e+06	EM	2.20137e+06	EM	14238467	EM	35190.1	EM	985882	EM	407431	EM	1.68696e+06	EM	42366.4	EM	7.90384e+06	EM	0	PM	3653175	EM		7513.12	619.736	1458.98	1269.31	118753	0
29	1	105.889	41.6515	74.7801	116.432	2717.62	1525.93	4243.55	48.8762	15.6998	0	15.6998		2.69002e+06	EM	1.85377e+06	EM	454762	EM	1.69499e+06	EM	6.56688e+06	EM	27181	EM	1.04614e+06	EM	445997	EM	3.88967e+06	EM	23841.8	EM	7375483	EM	0	PM	0	PM		15590.5	774.948	677.633	441.899	52385.8	0
30	1	126.871	38.1744	69.3476	107.522	2710.35	2894.2	5604.55	42.1201	14.3119	0	14.3119		1.15273e+06	EM	665952	EM	957789	EM	1.56184e+06	EM	4958927	EM	41494.5	EM	664074	EM	251664	EM	5.23374e+06	EM	15479.2	EM	6927642	EM	0	PM	0	PM		11999.5	741.632	409.787	2502.52	192209	0
31	1	80.5074	58.4822	75.3692	133.851	4084.49	3442.07	7526.56	98.3579	12.5363	0	12.5363		7.24466e+06	EM	684646	EM	1544908	EM	3881135	EM	7282804	EM	139549	EM	1978971	EM	403022	EM	1.50428e+06	EM	61446.1	EM	7212710	EM	0	PM	0	PM		26094	1108.84	604.125	862.804	59637.3	0
32	1	123.755	66.8124	115.178	181.991	3668.24	1448.09	5116.33	61.4976	3.89742	0	3.89742		3.12395e+06	EM	113652	EM	1.15294e+06	EM	1.98664e+06	EM	8712098	EM	17717.3	EM	1.20865e+06	EM	1.3676e+06	EM	22461972	EM	21950.4	EM	11433842	EM	0	PM	0	PM		13412.7	1114.16	1090.34	635.906	28377.1	0
33	1	106.432	34.5474	101.361	135.908	2740.48	2434.44	5174.92	38.1936	8.99169	0	8.99169		5061441	EM	559600	EM	1.74294e+06	EM	278868	EM	3.43691e+06	EM	21921.3	EM	554672	EM	425997	EM	1.61021e+06	EM	43147.4	EM	6.34529e+06	EM	0	PM	0	PM		16131.5	1464.34	339.817	1355.64	99710	0
34	1	68.9852	56.5607	131.339	187.9	2426.81	1828.47	4255.28	83.9509	4.85303	0	4.85303		6278976	EM	577830	EM	776749	EM	1.35313e+06	EM	7.28174e+06	EM	248544	EM	897782	EM	1.09578e+06	EM	5.3898e+06	EM	64859.6	EM	13534260	EM	0	PM	0	PM		8322.4	602.026	656.835	926.867	20466.2	0
35	1	61.6532	33.8206	66.2986	100.119	3563.91	2789.58	6353.49	43.0606	4.84102	0	4.84102		915295	EM	447972	EM	224795	PM	2000193	EM	2.57721e+06	EM	13068.7	EM	351703	EM	172002	EM	6392995	EM	17912	EM	7.67421e+06	EM	0	PM	0	PM		4665.79	987.975	632.183	1314.84	26611.7	0
36	1	124.424	54.5589	75.7024	130.261	4117.34	2788.72	6906.06	81.772	14.0101	0	14.0101		700914	EM	600242	EM	336500	EM	4531217	EM	5216300	EM	36088.4	EM	904541	EM	2.02085e+06	EM	12939776	EM	59288.9	EM	13582078	EM	0	PM	0	PM		11978.3	1365.09	301.74	2041.03	45639.2	0
37	1	98.5925	22.3266	81.0897	103.416	3315.26	2101.13	5416.39	63.6264	14.2646	0	14.2646		1.61178e+06	EM	286090	EM	927354	EM	289053	EM	632653	EM	45257.6	EM	668320	EM	295599	EM	2487608	EM	7745.64	EM	2319952	EM	0	PM	0	PM		5452.34	2590.66	818.802	1407.04	48411.2	0
38	1	103.448	35.6288	60.7863	96.415	2561.49	1814.7	4376.2	124.236	3.89201	0	3.89201		2.22564e+06	EM	700411	EM	682618	EM	314216	EM	978424	PM	97741	EM	650126	EM	242617	EM	2.39811e+06	EM	26069.8	EM	9904603	EM	0	PM	0	PM		1081.99	654.637	188.454	353.365	32858.5	0
39	1	79.6375	28.9592	53.5988	82.558	2614.75	2120.97	4735.72	71.3364	9.40584	0	9.40584		2173150	EM	215494	EM	283960	EM	1.0498e+06	EM	4707134	EM	32538	EM	784659	EM	207234	EM	4884333	EM	77799.4	EM	8739748	EM	6.33247e+06	EM	0	PM		7738.17	748.935	570.2	1184.98	40203.8	10528.5
40	1	120.138	40.4759	106.233	146.709	3752.5	1726.03	5478.52	92.3125	5.73405	0	5.73405		417652	EM	346708	EM	333552	EM	1.28999e+06	EM	7.60947e+06	EM	35758.8	EM	627222	EM	201071	EM	4.0836e+06	EM	57305.5	EM	7.99681e+06	EM	0	PM	0	PM		18379.2	2642.8	1384.17	1152.43	74829.5	0
41	1	105.664	28.7875	68.1093	96.8969	1979.38	2628.2	4607.58	68.6331	5.59359	0	5.59359		1638031	EM	921896	EM	277427	EM	278757	EM	4.49331e+06	EM	24180.2	EM	431340	EM	200204	EM	1152691	EM	14712.7	EM	5.80393e+06	EM	0	PM	0	PM		11788.7	1455.16	739.269	939.147	61160.3	0
42	1	102.422	28.7303	66.9133	95.6436	2677.86	1855.49	4533.35	67.6968	9.00047	0	9.00047		2.31545e+06	EM	3113014	EM	1.42137e+06	EM	2.41785e+06	EM	13040357	EM	21890.6	EM	635979	EM	210998	EM	4.00266e+06	EM	39420.8	EM	4214174	EM	0	PM	0	PM		8437.01	896.034	1113.32	1112.21	50939.6	0
43	1	103.881	33.1912	69.0615	102.253	3238.99	2146.87	5385.86	54.9955	4.98945	0	4.98945		2.12931e+06	EM	798482	EM	97794	EM	798253	EM	3.0122e+06	EM	83640.7	EM	718365	EM	539119	EM	5.69978e+06	EM	33964	EM	4438291	EM	0	PM	0	PM		7290.03	787.782	412.973	597.56	90179.7	0
44	1	94.2619	27.6796	52.8	80.4796	3258.41	2136.63	5395.04	45.3373	27.5605	0	27.5605		1.25944e+06	EM	1.12595e+06	EM	51998.3	EM	530255	EM	5.25244e+06	EM	8589.13	EM	1.57886e+06	EM	243235	EM	3.1997e+06	EM	26071.1	EM	4.61683e+06	EM	3684188	EM	0	PM		9544.62	3683.65	1973.58	929.484	65340.8	17047.9
45	1	65.3137	35.2348	80.1866	115.421	3226.27	1523.5	4749.77	77.4299	7.3171	0	7.3171		2.29343e+06	EM	226455	EM	1808945	PM	769438	EM	3432281	EM	38039	EM	1.03324e+06	EM	360758	EM	2139839	EM	339193	EM	8226122	EM	0	PM	0	PM		16186.5	1326.34	2343.65	1797.93	135149	0
46	1	173.446	27.4783	78.0394	105.518	2901.1	2492.82	5393.92	47.5551	10.8668	0	10.8668		972966	EM	183615	EM	72939.2	PM	252952	EM	6595485	EM	160419	EM	723682	EM	642755	EM	2.07911e+06	EM	14711.4	EM	11532073	EM	0	PM	0	PM		12309.2	591.503	337.071	850.047	31696.9	0
47	1	129.464	41.0192	96.8608	137.88	2258.54	1917.53	4176.07	55.5676	5.78513	0	5.78513		949318	EM	1851877	EM	145927	PM	952514	EM	2560681	EM	54495.2	EM	908289	EM	576338	EM	3.46552e+06	EM	49881.3	EM	3.12502e+06	EM	0	PM	0	PM		8206.82	1483.28	454.937	1849.7	47511.6	0
48	1	78.0493	45.2396	107.481	152.721	2784.55	2453.83	5238.38	61.1648	9.73498	0	9.73498		5.1586e+06	EM	2.10763e+06	EM	477822	EM	1.07198e+06	EM	5.31408e+06	EM	13019.4	EM	1108594	EM	753065	EM	4459327	EM	35879.2	EM	5.83728e+06	EM	0	PM	3.78915e+06	EM		8197.21	468.377	368.916	870.627	64521.2	0
49	1	85.6044	40.4153	86.4486	126.864	2219.18	1577.01	3796.19	82.6799	6.27737	0	6.27737		3.10155e+06	EM	4967834	EM	1.63211e+06	EM	1.18206e+06	EM	5.32349e+06	EM	23004.9	EM	0	PM	1.20654e+06	EM	3.64468e+06	EM	1737.31	EM	9457419	EM	0	PM	3971331	EM		3089.8	0	516.027	889.688	48619.8	0
50	1	90.5122	27.3163	55.005	82.3213	2330.21	2302.19	4632.4	59.9331	13.296	0	13.296		1.3171e+06	EM	683170	EM	1.0411e+06	EM	1.24388e+06	EM	703819	EM	23497.7	EM	686618	EM	342307	EM	7.74947e+06	EM	33605.7	EM	3.59144e+06	EM	3.30443e+06	EM	0	PM		10975.6	3066.58	394.092	1848.95	97810.1	46754.3
51	1	120.518	29.4723	108.59	138.062	2938.09	1068.35	4006.44	72.7849	6.8151	0	6.8151		1.80502e+06	EM	508740	EM	111957	PM	1.143e+06	EM	4733837	EM	28181.3	EM	932227	EM	298821	EM	3.04676e+06	EM	54914.6	EM	3.20027e+06	EM	0	PM	0	PM		21279.2	1949.8	1070.93	1756.43	86832.9	0
52	1	149.437	29.5228	48.9064	78.4293	2150.84	3274.02	5424.86	81.3827	9.86084	0	9.86084		1.67963e+06	EM	1.21603e+06	EM	229570	EM	645589	EM	1.06979e+06	EM	33754.3	EM	471429	EM	221087	EM	3.67035e+06	EM	5233.59	EM	3036212	EM	0	PM	0	PM		17928.8	986.368	728.814	466.31	42424.2	0
53	1	112.544	37.8024	77.9111	115.714	2242.82	2019.56	4262.38	40.4096	25.7946	0	25.7946		3.08177e+06	EM	612805	EM	389371	EM	660445	EM	4432886	EM	23029.3	EM	502888	EM	615681	EM	3449117	EM	21699.2	EM	4.77014e+06	EM	0	PM	0	PM		5360.07	1367.24	357.379	1646.15	158466	0
54	1	69.0471	31.8271	80.0642	111.891	3923.74	1581.42	5505.17	37.7473	13.7033	0	13.7033		4.41961e+06	EM	10321808	EM	1.6551e+06	EM	2.78161e+06	EM	9390261	EM	99597.7	EM	981051	EM	1.14893e+06	EM	4465732	EM	184354	EM	24734086	EM	0	PM	0	PM		19273.9	726.683	394.219	576.878	82849.6	0
55	1	124.735	46.86	92.4861	139.346	1937.29	1640.86	3578.16	35.5567	6.43572	0	6.43572		6233889	EM	753756	EM	1.75075e+06	PM	3.44011e+06	EM	3.32562e+06	EM	37993.3	EM	1.20015e+06	EM	1.04838e+06	EM	5.4423e+06	EM	71406	EM	13198950	EM	0	PM	0	PM		11934.8	1083.6	626.308	1004.39	79703.6	0
56	1	116.663	28.5368	57.8651	86.4018	5052.01	4345.86	9397.87	81.7697	5.98129	0	5.98129		1.6676e+06	EM	959690	EM	116138	EM	673967	EM	2.58326e+06	EM	102885	EM	534242	EM	528262	EM	3074358	EM	38789.2	EM	3655681	EM	5860899	EM	0	PM		22058.2	1895.93	890.782	4278.38	45639.5	21275.3
57	1	95.8171	35.7004	61.9187	97.6191	3089.72	2363.05	5452.76	98.935	11.0813	0	11.0813		2.10156e+06	EM	6293539	EM	79672.7	EM	3.543e+06	EM	2.29879e+06	EM	163934	EM	549668	EM	322361	EM	1.69291e+06	EM	108766	EM	8.35551e+06	EM	0	PM	0	PM		10946.9	896.401	2078.96	1996.31	188110	0
58	1	116.387	41.2741	98.1644	139.438	2924.72	2341.6	5266.32	99.3926	24.4882	0	24.4882		2.12231e+06	EM	2.70522e+06	EM	1.93495e+06	EM	756289	EM	1.12177e+06	PM	53119.1	EM	1.08719e+06	EM	211104	EM	3.31895e+06	EM	172473	EM	13124522	EM	0	PM	0	PM		1992.94	3114.74	1109.14	2722.61	56744.3	0
59	1	105.961	35.9618	78.2325	114.194	3821.32	2277.79	6099.11	74.5752	5.91755	0	5.91755		5321414	EM	149472	EM	1.64437e+06	EM	856610	EM	3.18041e+06	EM	24475.7	EM	637354	EM	223197	EM	2884316	EM	149668	EM	4640322	EM	0	PM	0	PM		11478.5	3052.36	936.295	1395.56	68013.8	0
60	1	111.581	32.4009	70.4284	102.829	4368.91	2155.46	6524.36	58.9234	3.72074	0	3.72074		1.43721e+06	EM	596276	EM	989664	EM	690568	EM	3.17479e+06	EM	107584	EM	811491	EM	280207	EM	2.59112e+06	EM	16285.9	EM	9855783	EM	0	PM	0	PM		11367.5	1539.55	716.572	3030.46	119006	0
61	1	109.683	33.649	49.4867	83.1357	5315.87	1905.44	7221.31	68.2608	17.9981	0	17.9981		2837048	EM	415102	EM	4.77405e+06	EM	336134	EM	4402833	EM	120178	EM	989987	EM	260811	EM	6.84223e+06	EM	164045	EM	13340118	EM	0	PM	0	PM		19498.5	1646.29	506.578	2852.02	54291	0
62	1	112.771	58.9366	82.7713	141.708	3206.05	2296.58	5502.63	48.1464	9.56934	0	9.56934		3152775	EM	419732	EM	3.674e+06	EM	980686	EM	5.6897e+06	EM	113618	EM	982696	EM	566768	EM	6.49837e+06	EM	1009.46	EM	10983333	EM	0	PM	0	PM		9141.86	2728.24	329.069	450.873	49902.8	0
63	1	123.276	46.2181	75.5154	121.733	3176.14	1524.7	4700.84	88.0419	15.4284	0	15.4284		3.07869e+06	EM	351691	EM	344886	PM	877704	EM	7.5059e+06	EM	237133	EM	2.66961e+06	EM	1197738	EM	3.01998e+06	EM	93423.3	EM	13537486	EM	0	PM	0	PM		12636	1666.81	741.923	1677.68	47000	0
64	1	92.7345	60.4462	92.5422	152.988	2606.84	1640.67	4247.51	64.2164	4.71803	0	4.71803		3936744	EM	847850	EM	608529	EM	1146115	EM	1.6394e+06	EM	226229	EM	475422	EM	290230	EM	3.56839e+06	EM	157449	EM	6.96697e+06	EM	0	PM	0	PM		11619.5	1130.83	390.327	310.814	47557.3	0
65	1	105.969	24.3457	61.6851	86.0308	3077.09	3006.78	6083.87	55.1959	6.51634	0	6.51634		3.02314e+06	EM	480394	EM	717580	EM	261324	EM	1.92467e+06	EM	3643.27	EM	218470	EM	293850	EM	3.03351e+06	EM	5618.82	EM	5056733	EM	0	PM	0	PM		15729.3	1428.38	1954.83	1542.64	59261.6	0
66	1	90.5369	36.0885	74.1618	110.25	2564.08	1741.6	4305.67	54.9164	9.08663	0	9.08663		1.49585e+06	EM	413736	EM	88325.2	PM	519116	EM	3.39976e+06	EM	23660.3	EM	509562	EM	364223	EM	1.93577e+06	EM	21009.5	EM	2.42003e+06	EM	0	PM	0	PM		9390.13	788.294	683.241	1797.15	19594.2	0
67	1	74.0063	21.0099	55.956	76.9659	3069.83	2452.38	5522.21	53.6555	14.7842	0	14.7842		667923	EM	68517.6	EM	352053	EM	538711	EM	379663	PM	25261.3	EM	279273	EM	109882	EM	872748	EM	8182.31	EM	2741118	EM	0	PM	0	PM		2796.94	1054.07	262.165	2199.34	72157.8	0
68	1	87.1516	56.7073	140.139	196.846	2645.63	3962.81	6608.44	42.9882	16.4984	0	16.4984		4097755	EM	1.03219e+06	EM	1.195e+06	EM	761316	EM	5732679	EM	35584.7	EM	1.24832e+06	EM	1.49899e+06	EM	3.06374e+06	EM	52224	EM	6825921	EM	7381267	EM	0	PM		10190.1	2153.97	1139.97	1273.95	68485.5	21591
69	1	140.566	43.6554	57.2046	100.86	2301.76	3069.76	5371.52	98.9216	13.3369	0	13.3369		4974471	EM	1.05106e+06	EM	992127	EM	1.42263e+06	EM	3.71433e+06	EM	19329	EM	1.18219e+06	EM	365944	EM	9707795	EM	43189.5	EM	9450827	EM	0	PM	0	PM		11255.2	1377.55	733.716	798.288	52481.5	0
70	1	109.126	30.5366	51.6594	82.1961	2042.36	3976.02	6018.38	47.4231	6.34512	0	6.34512		3.68613e+06	EM	398403	EM	7277.2	PM	2.41644e+06	EM	4.90764e+06	EM	24463.2	EM	931667	EM	398640	EM	1.93147e+06	EM	25212	EM	7824060	EM	0	PM	782152	EM		10790.6	4432.99	1604.27	2438.06	61450	0
71	1	126.282	45.1571	120.253	165.41	2352.83	2256.37	4609.2	80.3069	15.0923	0	15.0923		4707375	EM	1.32494e+06	EM	616128	EM	1.45565e+06	EM	5103430	EM	4561.25	EM	865510	EM	1.17867e+06	EM	4.31554e+06	EM	7874.13	EM	6.31977e+06	EM	0	PM	0	PM		4129.88	286.672	1192.28	780.448	16358.1	0
72	1	76.0307	43.6879	75.0553	118.743	3987.19	2079.49	6066.68	113.404	14.1499	0	14.1499		5.98887e+06	EM	548506	EM	743992	EM	1.4411e+06	EM	1.32536e+06	PM	40941.3	EM	1.41925e+06	EM	636326	EM	6.70084e+06	EM	315146	EM	11313839	EM	0	PM	0	PM		2870.89	2042.65	669.552	1736.22	116300	0
73	1	79.6293	43.838	83.9192	127.757	1330.11	2120.89	3451	80.7589	4.16936	0	4.16936		1.57408e+06	EM	2.05929e+06	EM	540530	EM	2373312	EM	5.79923e+06	EM	46843.7	EM	690482	EM	1.00226e+06	EM	5.68558e+06	EM	14750.8	EM	8240123	EM	0	PM	0	PM		9838.27	484.226	265.249	1999.21	26143.4	0
74	1	127.248	33.5951	78.183	111.778	1990.01	1590.32	3580.32	43.0225	14.4498	0	14.4498		1.1395e+06	EM	37802.9	EM	223332	EM	1060663	EM	1.04938e+06	EM	90199.4	EM	357113	EM	444302	EM	3.06178e+06	EM	26273.6	EM	7.95948e+06	EM	0	PM	0	PM		8002.95	2202.7	552.726	790.094	40026.2	0
75	1	143	47.8489	96.6712	144.52	2130.04	2396.72	4526.75	54.8369	8.44536	0	8.44536		2865885	EM	110435	EM	2.83088e+06	EM	1.03289e+06	EM	9777771	EM	101696	EM	2.07924e+06	EM	1.38797e+06	EM	7327771	EM	167503	EM	10047978	EM	0	PM	0	PM		16391.3	1380.32	2211.74	1188.9	97057.1	0
76	1	113.259	32.5329	62.0609	94.5938	2580.3	2429.82	5010.12	64.202	4.92792	0	4.92792		1.77161e+06	EM	1.85828e+06	EM	214677	EM	1135368	EM	4698394	EM	33863.3	EM	317065	EM	483301	EM	1.80884e+06	EM	86510.8	EM	7.84008e+06	EM	0	PM	0	PM		26483.2	1850.72	1398.92	906.434	39864.8	0
77	1	113.946	37.622	64.0719	101.694	2157.22	2241.43	4398.65	83.2179	8.54226	0	8.54226		3.45048e+06	EM	121519	EM	616647	EM	1.15098e+06	EM	4.52491e+06	EM	4487.91	EM	548238	EM	476086	EM	1.3489e+06	EM	28181.3	EM	10015243	EM	0	PM	0	PM		1880.23	1127.98	307.811	1723.58	25446	0
78	1	95.7142	47.5746	113.852	161.426	1525.81	1888.12	3413.94	29.5637	25.4594	0	25.4594		3992494	EM	392734	EM	693584	EM	789774	EM	5003594	EM	140975	EM	536387	EM	597421	EM	2.12576e+06	EM	52911	EM	10252565	EM	0	PM	0	PM		15457.1	1139.84	406.107	936.432	41160	0
79	1	126.853	74.7214	104.487	179.209	2958.93	2062.41	5021.34	86.7925	11.1902	0	11.1902		1.64384e+06	EM	206891	EM	1.56857e+06	EM	2.76771e+06	EM	12186170	EM	59345	EM	1556482	EM	1.25552e+06	EM	10797856	EM	8080.67	EM	12320501	EM	0	PM	0	PM		49532.8	1443.25	120.846	894.697	57056.4	0
80	1	88.0456	29.3326	55.0383	84.3709	2673.47	1843.23	4516.71	82.9238	13.9673	0	13.9673		2.28714e+06	EM	391191	EM	421117	PM	359809	EM	3.61885e+06	EM	61840	EM	624306	EM	119838	EM	1.48714e+06	EM	17966.7	EM	8832870	EM	0	PM	0	PM		6883.11	1069.75	233.652	1189.38	76430.9	0
81	1	71.6823	46.9569	65.8247	112.782	3694.2	2225.6	5919.8	48.2858	11.0533	0	11.0533		5.13235e+06	EM	187538	EM	577356	EM	1.07969e+06	EM	1.69035e+06	EM	50663.8	EM	1190081	EM	656895	EM	2.18969e+06	EM	18870	EM	11692742	EM	0	PM	0	PM		4215.26	1421.29	1030.44	574.923	90365.8	0
82	1	129.488	34.4548	66.8281	101.283	3065.94	3011.55	6077.49	53.6563	23.6227	0	23.6227		681565	EM	535072	EM	1.23054e+06	EM	760070	EM	3.68032e+06	PM	15943.6	EM	750981	EM	308547	EM	2.36971e+06	EM	28104.6	EM	12005320	EM	0	PM	0	PM		2041.02	1167.51	604.011	1015.66	83415	0
83	1	120.113	30.8714	46.2074	77.0789	4517.4	1618.42	6135.82	70.7461	15.9862	0	15.9862		5943512	EM	12806492	EM	662340	EM	411049	EM	3384721	EM	13436.3	EM	501894	EM	233743	EM	2.71189e+06	EM	33683.2	EM	7480366	EM	0	PM	0	PM		17241.6	1257.48	690.08	998.218	155005	0
84	1	112.226	33.5228	67.7884	101.311	2129.34	2699.64	4828.98	56.624	8.88672	0	8.88672		3.10802e+06	EM	608680	EM	485869	EM	468590	EM	2.9108e+06	PM	7878.38	EM	827476	EM	809839	EM	1223627	EM	5393.57	EM	6.26392e+06	EM	0	PM	0	PM		2554.35	1469.31	454.188	918.543	99320.1	0
85	1	123.919	38.5338	66.9459	105.48	3854.67	1564.96	5419.63	120.322	27.1568	0	27.1568		4614788	EM	473090	EM	738918	EM	1.18072e+06	EM	4.83731e+06	EM	27933.2	EM	307364	EM	797157	EM	8120063	EM	5743.66	EM	7523982	EM	0	PM	0	PM		11350.7	1276.34	984.616	1004.87	26321.9	0
86	1	127.106	23.8081	57.92	81.7281	2122.74	3363.69	5486.43	58.857	6.97422	0	6.97422		2.29569e+06	EM	440552	EM	2014025	EM	610681	EM	4146452	EM	5902.87	EM	590167	EM	714368	EM	937516	EM	71345	EM	3.75003e+06	EM	0	PM	0	PM		15684.2	2192.58	1031.97	946.391	47818.1	0
87	1	98.0935	55.8903	132.106	187.996	1693.19	2334.47	4027.67	52.876	10.2051	0	10.2051		4675345	EM	979843	EM	457618	EM	2.45777e+06	EM	8581203	EM	47962.6	EM	1.59607e+06	EM	204115	EM	5.56519e+06	EM	36152.6	EM	9228725	EM	0	PM	0	PM		11285.8	2645.29	622.976	835.248	68172.6	0
88	1	126.774	43.2426	94.2168	137.459	2838.71	1643.09	4481.8	70.6542	6.11795	0	6.11795		3.01177e+06	EM	136286	EM	10537643	EM	2.69923e+06	EM	5616417	EM	67155.7	EM	605831	EM	932508	EM	4357956	EM	71340.6	EM	7.3303e+06	EM	0	PM	0	PM		16474.2	927.657	3069.27	2156.12	38981.5	0
89	1	95.9978	46.404	120.28	166.684	4368.85	4048.71	8417.56	68.1321	11.8971	0	11.8971		1.41172e+06	EM	2.15527e+06	EM	7290479	EM	3.78182e+06	EM	9181057	EM	36480.8	EM	1.20161e+06	EM	841698	EM	13553748	EM	178087	EM	12038919	EM	0	PM	0	PM		13141.4	3794.72	999.204	1131.82	29533.3	0
90	1	68.3679	21.0379	58.86	79.8978	2655.31	2766.89	5422.2	54.91	8.33342	0	8.33342		760605	EM	607388	EM	194296	EM	677637	EM	5858940	EM	46974.6	EM	516450	EM	359701	EM	1.11953e+06	EM	101204	EM	5698144	EM	0	PM	0	PM		6888.66	1955.46	670.726	3700.55	73662.9	0
91	1	110.679	43.1985	95.161	138.359	2342.65	2383.6	4726.25	42.8714	12.8491	0	12.8491		1.41073e+06	EM	397131	EM	3505302	EM	1.0126e+06	EM	2.8284e+06	EM	59495.3	EM	841680	EM	1.6382e+06	EM	3.38011e+06	EM	62326.2	EM	8100374	EM	0	PM	0	PM		13677.9	1865.72	544.11	1491.18	37179.5	0
92	1	82.263	39.2144	93.4904	132.705	4010.24	1263.82	5274.06	64.4663	9.23415	0	9.23415		4247142	EM	304893	EM	604112	EM	369323	EM	4.50155e+06	EM	20048.8	EM	1010726	EM	228294	EM	3.27174e+06	EM	5770.12	EM	10345797	EM	13060496	EM	0	PM		10089.5	2321.61	658.932	798.326	34468.4	17853.6
93	1	98.3664	44.2539	66.8103	111.064	2654.21	2139.35	4793.56	46.6083	11.5041	0	11.5041		1.8712e+06	EM	714549	EM	271519	EM	2289716	EM	4.69315e+06	EM	101512	EM	795717	EM	667774	EM	4251354	EM	42916.5	EM	9254303	EM	0	PM	0	PM		4819.56	912.688	366.012	696.425	79358.4	0
94	1	102.25	49.2891	70.1417	119.431	2518.73	1323.17	3841.9	53.0436	16.1959	0	16.1959		4.36895e+06	EM	56954.1	EM	1.0078e+06	EM	661481	EM	7.42075e+06	EM	95444.5	EM	944290	EM	287241	EM	4138065	EM	300173	EM	13123659	EM	0	PM	0	PM		5555.48	692.131	1008.25	1016.85	41254.2	0
95	1	139.837	24.8626	55.6247	80.4874	2467.49	2651.42	5118.91	75.1315	28.2777	0	28.2777		1.95918e+06	EM	218781	EM	1.0828e+06	EM	230912	EM	707604	EM	19979.4	EM	219997	EM	154542	EM	1407479	EM	62386.7	EM	3.65778e+06	EM	0	PM	0	PM		8050.14	1287.45	919.173	690.209	72766.5	0
96	1	124.905	37.8222	88.9883	126.811	1975.76	3813.31	5789.07	76.5538	11.6238	0	11.6238		2185572	EM	97680.2	EM	413598	EM	952991	EM	8916665	EM	15063.2	EM	521754	EM	281864	EM	3.93218e+06	EM	20079.9	EM	7315913	EM	0	PM	0	PM		7606.6	1154.08	871.499	496.725	24438.2	0
97	1	141.464	43.8072	72.7164	116.524	2316.97	1409.67	3726.64	72.2173	8.12552	0	8.12552		1.42385e+06	EM	1.3929e+06	EM	4.7988e+06	EM	1080892	EM	2.35053e+06	EM	31822.8	EM	0	PM	452215	EM	1.40854e+06	EM	19660.1	EM	4554753	EM	0	PM	0	PM		11041.8	0	733.801	1720.43	66798.6	0
98	1	106.473	17.7185	40.1999	57.9184	3694.47	2825.97	6520.44	46.1669	14.73	0	14.73		1.17657e+06	EM	241690	EM	548729	EM	330330	EM	1.02447e+06	EM	46773.1	EM	291081	EM	113539	EM	888828	EM	18707.5	EM	3.40326e+06	EM	3.51135e+06	EM	0	PM		4937.2	1060.53	172.601	736.238	142756	7626.13
99	1	118.319	41.1657	105.504	146.67	1524.08	2640.11	4164.2	40.7977	6.52758	0	6.52758		3.26667e+06	EM	295670	EM	1.75216e+06	EM	886239	EM	3.47361e+06	EM	585054	EM	1.37185e+06	EM	515842	EM	6.28903e+06	EM	169541	EM	19993556	EM	18689428	EM	0	PM		6977.09	1044.17	490.046	1585.2	55745.7	23412.7
100	1	114.704	29.2325	89.4813	118.714	5748.34	1968.11	7716.44	83.2708	7.13598	0	7.13598		3.27408e+06	EM	682210	EM	41213.7	PM	1.76445e+06	EM	1.96835e+06	PM	18017.2	EM	445100	EM	446103	EM	5.68362e+06	EM	27137.3	EM	4.75133e+06	EM	0	PM	0	PM		4175.65	1212.86	166.196	1839.9	54722.7	0

## Sheet: Enzymatic Status UGTs
		Liver																		Liver
		Absolute UGT Abundance (pmol UGT)																		Relative UGT Abundances
Index	Trial	UGT1A1	UGT1A3	UGT1A4	UGT1A5	UGT1A6	UGT1A7	UGT1A8	UGT1A9	UGT1A10	UGT2B4	UGT2B7	UGT2B10	UGT2B11	UGT2B15	UGT2B17	UGT2B28	User UGT1		UGT1A1	PM/EM/IM/UM	UGT1A3	PM/EM/IM/UM	UGT1A4	PM/EM/IM/UM	UGT1A5	PM/EM/IM/UM	UGT1A6	PM/EM/IM/UM	UGT1A7	PM/EM/IM/UM	UGT1A8	PM/EM/IM/UM	UGT1A9	PM/EM/IM/UM	UGT1A10	PM/EM/IM/UM	UGT2B4	PM/EM/IM/UM	UGT2B7	PM/EM/IM/UM	UGT2B10	PM/EM/IM/UM	UGT2B11	PM/EM/IM/UM	UGT2B15	PM/EM/IM/UM	UGT2B17	PM/EM/IM/UM
1	1	738227	591643	1.20341e+06	0	620561	0	0	1.24118e+06	972.842	1.58123e+06	2.00462e+06	204554	0	1.09552e+06	119415	0	0		0.510879	IM	0.85448	EM	0.768741	EM	0.490948	EM	1.03068	EM	0.810232	EM	1.25764	EM	1.32997	EM	1.61578	EM	0.97268	EM	0.937873	EM	1.04535	EM	1.00659	EM	0.933097	IM	0.672322	EM
2	1	3.96683e+06	1.3487e+06	4469159	0	1299156	0	0	2.96594e+06	2060.06	6197566	7.28224e+06	878682	0	1.89917e+06	560904	0	0		0.833148	EM	0.591163	EM	0.866447	EM	1.00908	EM	0.654864	EM	0.662833	EM	1.1114	EM	0.96454	EM	1.03841	EM	1.15704	EM	1.03401	EM	1.36282	EM	1.004	EM	0.49093	IM	0.958421	EM
3	1	3.55208e+06	1.4836e+06	4.86887e+06	0	1.06457e+06	0	0	1.95348e+06	1407.1	2.41241e+06	4.79935e+06	202463	0	1.33467e+06	70090.2	0	0		1.19091	EM	1.03807	EM	1.50682	EM	1.33741	EM	0.856607	EM	0.959506	EM	1.4457	EM	1.01411	EM	1.13222	EM	0.718944	EM	1.08783	EM	0.501268	EM	0.731453	EM	0.550739	IM	0.19118	IM
4	1	2.66153e+06	1.04474e+06	2.58877e+06	0	1.17066e+06	0	0	1.99169e+06	1057.23	2.78853e+06	2754074	414645	0	133029	324460	0	0		1.06377	EM	0.871436	EM	0.955093	PM	1.11244	EM	1.12294	EM	1.67398	EM	1.19137	EM	1.23258	EM	1.01413	EM	0.990688	EM	0.744172	EM	1.22382	EM	1.05323	EM	0.0654393	PM	1.05503	EM
5	1	1.159e+06	728882	2.04033e+06	0	1.18681e+06	0	0	1.22653e+06	630.568	1.69585e+06	1792076	216777	0	774769	250582	0	0		0.594115	PM	0.779756	EM	0.965444	EM	0.686414	EM	1.46009	EM	1.27452	EM	1.11214	EM	0.973519	EM	0.775766	EM	0.772723	EM	0.621051	EM	0.820595	EM	0.808038	EM	0.488806	IM	1.04503	EM
6	1	4214965	2.393e+06	3.24166e+06	0	989130	0	0	1.47321e+06	710.128	3.09724e+06	5012002	523517	0	739094	278504	0	0		1.40076	IM	1.65968	EM	0.994428	EM	1.50247	EM	0.788921	EM	0.668011	EM	0.825579	EM	0.758077	EM	0.566391	EM	0.914937	EM	1.12606	EM	1.28478	EM	0.78637	EM	0.302305	IM	0.752991	EM
7	1	2.17772e+06	823760	3.23519e+06	0	833277	0	0	2.01403e+06	1936.39	3.32669e+06	1.94389e+06	308491	0	155379	46000	0	0		0.818552	IM	0.646188	EM	1.12249	PM	1.14719	EM	0.751701	EM	1.03726	EM	1.20629	EM	1.17217	EM	1.74682	EM	1.11149	EM	0.493969	EM	0.856277	EM	0.979952	EM	0.071881	PM	0.140667	IM
8	1	1.25774e+06	1.24013e+06	2.22548e+06	0	1.07612e+06	0	0	1.22745e+06	1790.41	4.75425e+06	6.21374e+06	361378	0	2.55059e+06	423776	0	0		0.32838	PM	0.675722	EM	0.53635	EM	0.86322	EM	0.674305	EM	0.982682	EM	0.693255	EM	0.496216	EM	1.12189	EM	1.10335	EM	1.09679	EM	0.696747	EM	0.964774	EM	0.819602	EM	0.900143	EM
9	1	2143508	1.43778e+06	5.54975e+06	0	1.37039e+06	0	0	1.66495e+06	1013.34	4.04575e+06	6036942	379748	0	995004	352622	0	0		0.659948	IM	0.923825	EM	1.57723	EM	1.03209	EM	1.0126	EM	1.06515	EM	1.3375	EM	0.793718	EM	0.748777	EM	1.10721	EM	1.25656	EM	0.863392	EM	0.741548	EM	0.377039	IM	0.88325	EM
10	1	3.3731e+06	1854998	2708360	0	436279	0	0	887304	721.346	2.69964e+06	3.83638e+06	451899	0	829630	59159.2	0	0		1.29874	EM	1.49056	EM	0.962583	PM	1.05215	EM	0.403153	EM	0.963265	EM	1.07409	EM	0.528988	EM	0.666574	EM	0.923947	EM	0.998616	EM	1.28488	EM	0.732095	EM	0.393147	IM	0.185313	IM
11	1	1.23228e+06	482444	2.59343e+06	0	663766	0	0	970968	285.872	2.37454e+06	3.02437e+06	221441	0	49150.2	29894.2	0	0		0.844529	IM	0.690025	EM	1.64066	EM	0.870012	EM	1.09177	EM	1.10396	EM	0.92655	EM	1.03036	EM	0.470205	EM	1.44654	EM	1.40127	EM	1.1207	EM	1.38634	EM	0.0414578	PM	0.166679	IM
12	1	1.31886e+06	1.46043e+06	3.65847e+06	0	608759	0	0	1.28494e+06	893.487	1.82468e+06	2534209	282472	0	557659	34292.4	0	0		0.557673	IM	1.28877	EM	1.42797	EM	0.602843	EM	0.617785	EM	0.888184	EM	0.745916	EM	0.841288	EM	0.906734	EM	0.685827	EM	0.724446	EM	0.882031	EM	0.822646	EM	0.290219	IM	0.117969	IM
13	1	2.96838e+06	2.20823e+06	3.02782e+06	0	818596	0	0	1.89052e+06	1179.15	2682988	5.0087e+06	297026	0	2.08024e+06	31192	0	0		0.883767	EM	1.37207	EM	0.83212	EM	1.19455	EM	0.584923	EM	1.27951	EM	1.22663	EM	0.871525	EM	0.842555	EM	0.710042	EM	1.00815	EM	0.653041	EM	1.56269	EM	0.762267	EM	0.0755528	PM
14	1	4679717	2.01509e+06	4940190	0	1.71724e+06	0	0	1953175	1429.4	3.8506e+06	4.39301e+06	359922	0	199612	357978	0	0		1.55317	IM	1.39576	EM	1.5135	EM	1.62274	EM	1.36786	EM	1.32491	EM	1.02202	EM	1.00374	EM	1.13859	EM	1.136	EM	0.985703	EM	0.88214	EM	0.841682	EM	0.0815388	PM	0.9666	EM
15	1	2100065	1.08594e+06	1.99535e+06	0	654655	0	0	1.80372e+06	617.543	2121555	2.31149e+06	627711	0	655239	184514	0	0		0.930849	IM	1.00453	EM	0.8164	PM	1.50892	EM	0.696418	EM	1.10853	EM	0.958424	EM	1.23793	EM	0.656939	EM	0.835888	EM	0.692663	EM	2.05463	EM	1.0004	EM	0.357456	IM	0.665372	EM
16	1	3.43006e+06	1.05069e+06	1.73124e+06	0	796068	0	0	1.69584e+06	1211.33	2704904	3818652	235205	0	181593	291483	0	0		1.38965	EM	0.888368	EM	0.647439	EM	0.716312	EM	0.774042	EM	1.05132	EM	1.15814	EM	1.06382	EM	1.17781	EM	0.974097	EM	1.04591	EM	0.703684	EM	1.67016	EM	0.0905479	PM	0.960738	EM
17	1	964004	841358	3.31559e+06	0	1289017	0	0	2.27056e+06	905.418	2186872	6.4966e+06	553465	0	3427068	43170.2	0	0		0.411654	PM	0.749804	EM	1.30693	EM	1.06599	EM	1.32106	EM	1.25677	EM	0.78482	EM	1.5013	EM	0.927927	EM	0.830088	EM	1.87553	EM	1.7453	EM	0.955259	EM	1.80116	EM	0.149978	PM
18	1	3.30112e+06	2.00456e+06	8513493	0	2.38121e+06	0	0	3.17445e+06	3116.01	6459956	7996514	1.66211e+06	0	1.04621e+06	99628	0	0		0.555896	IM	0.704474	EM	1.32336	EM	1.16585	EM	0.962367	EM	0.791933	EM	0.859747	EM	0.827714	EM	1.25934	EM	0.966961	EM	0.910365	EM	2.0669	EM	1.09711	EM	0.216833	IM	0.136491	IM
19	1	1.07567e+06	407623	1.5617e+06	0	498426	0	0	828708	698.484	2.06754e+06	2.58982e+06	230635	0	486510	21911.6	0	0		0.813325	IM	0.643217	EM	1.08999	PM	0.523987	EM	0.904476	EM	1.06163	EM	1.46487	EM	0.970212	EM	1.26752	EM	1.38959	EM	1.32385	EM	1.28777	EM	1.19364	EM	0.452745	IM	0.134787	PM
20	1	2325807	1.50186e+06	3218481	0	627106	0	0	1.42453e+06	1126.71	4314762	3.5114e+06	504766	0	852774	105184	0	0		0.819182	EM	1.10395	EM	1.04639	EM	1.32148	EM	0.530101	EM	1.4842	EM	0.672821	EM	0.776886	EM	0.952421	EM	1.35086	EM	0.836122	EM	1.31288	EM	0.788054	EM	0.369672	IM	0.301401	IM
21	1	2.26417e+06	474009	1.40989e+06	0	959213	0	0	750903	1099.85	1.15757e+06	2.59653e+06	235642	0	90430.8	328970	0	0		1.26944	EM	0.554628	EM	0.729671	EM	0.750216	EM	1.29071	EM	1.10796	EM	1.29683	EM	0.651877	EM	1.47995	EM	0.576897	EM	0.984189	EM	0.975627	EM	1.05748	EM	0.0624016	PM	1.50054	EM
22	1	1.8538e+06	901438	1.03406e+06	0	744606	0	0	1.40906e+06	715.366	1.8349e+06	1.97628e+06	195958	0	94477.4	25250.9	0	0		0.916039	EM	0.929609	EM	0.471666	PM	0.745616	EM	0.883058	EM	1.43728	EM	0.80553	EM	1.07811	EM	0.848381	EM	0.805956	EM	0.660212	EM	0.715059	EM	0.951329	EM	0.0574587	PM	0.101512	PM
23	1	4378975	2.57083e+06	5.33115e+06	0	2.16071e+06	0	0	2571752	1882.1	3933415	7.54591e+06	500684	0	2.47317e+06	497678	0	0		1.03005	EM	1.26204	EM	1.15756	EM	1.26271	EM	1.21981	EM	0.903831	EM	0.924945	EM	0.936685	EM	1.06253	EM	0.822436	EM	1.19999	EM	0.869715	EM	1.22106	EM	0.716006	IM	0.952407	EM
24	1	1.43203e+06	503535	1469483	0	487932	0	0	973691	442.505	1.79358e+06	3.11811e+06	325407	0	408273	192186	0	0		1.06988	EM	0.785101	EM	1.01341	EM	0.921111	EM	0.874889	EM	1.15549	EM	0.68436	EM	1.12638	EM	0.793436	EM	1.19111	EM	1.57491	EM	1.7953	EM	0.949312	EM	0.375414	IM	1.16813	EM
25	1	2.06342e+06	599671	2.64895e+06	0	555423	0	0	1.1014e+06	852.403	2.07247e+06	3.69428e+06	390264	0	87500.8	49804.3	0	0		1.01654	EM	0.616545	EM	1.20462	EM	0.921106	EM	0.656709	EM	0.752756	EM	1.64357	EM	0.840164	EM	1.00785	EM	0.907559	EM	1.23041	EM	1.41979	EM	0.970202	EM	0.0530551	PM	0.199615	IM
26	1	0	724761	2236018	0	1.05726e+06	0	0	1.30601e+06	928.069	1858079	3464810	273384	0	92848.9	444039	0	0		0	UM	0.767684	EM	1.04758	EM	1.56094	EM	1.28785	EM	0.68136	EM	0.905788	EM	1.02636	EM	1.13049	EM	0.838273	EM	1.18888	EM	1.02465	EM	1.16774	EM	0.0579999	PM	1.83352	EM
27	1	1.22983e+06	1.28957e+06	1.85004e+06	0	1.29443e+06	0	0	1.70212e+06	1547.38	3.37814e+06	6545011	564366	0	1.22987e+06	333054	0	0		0.431648	IM	0.944587	EM	0.599381	EM	0.725431	EM	1.09037	EM	1.31569	EM	0.675006	EM	0.925026	EM	1.30345	EM	1.05392	EM	1.55302	EM	1.46276	EM	0.529075	EM	0.531275	IM	0.951015	EM
28	1	3.23654e+06	2439260	1.91074e+06	0	770761	0	0	1.65015e+06	1542.42	3389706	3.57273e+06	361039	0	749406	36155.4	0	0		0.949489	EM	1.49341	EM	0.517426	PM	1.27721	EM	0.542675	EM	0.876893	EM	1.57044	EM	0.74957	EM	1.08598	EM	0.883931	EM	0.708586	EM	0.78215	EM	0.748549	EM	0.270584	IM	0.0862921	PM
29	1	3.91722e+06	1.20841e+06	3.3838e+06	0	1.29894e+06	0	0	2.52445e+06	1217.87	3.37745e+06	4304666	443719	0	1.66698e+06	49293.1	0	0		1.11559	EM	0.718217	EM	0.88955	EM	0.899312	EM	0.88783	EM	1.07429	EM	0.815058	EM	1.1132	EM	0.832415	EM	0.854995	EM	0.828801	EM	0.933177	EM	1.09169	EM	0.584297	IM	0.11421	IM
30	1	2.19185e+06	870948	2.83251e+06	0	1201406	0	0	1345270	2048.24	2546980	3.30153e+06	376957	0	226803	371778	0	0		0.789951	IM	0.655081	EM	0.942321	EM	1.08664	EM	1.03918	EM	0.732343	EM	0.67017	EM	0.750721	EM	1.77167	EM	0.815948	EM	0.804429	EM	1.00325	EM	1.20669	EM	0.100604	PM	1.09009	EM
31	1	4.15022e+06	1.90271e+06	4.16662e+06	0	1.88584e+06	0	0	2.14407e+06	1374.02	4056457	5087489	802761	0	1.39279e+06	604392	0	0		1.07582	EM	1.02933	EM	0.996989	EM	0.738241	EM	1.17323	EM	0.918649	EM	1.00299	EM	0.860572	EM	0.854813	EM	0.93468	EM	0.891569	EM	1.53668	EM	0.804651	EM	0.444356	IM	1.27461	EM
32	1	1.78167e+06	1.01286e+06	3.28621e+06	0	2.10026e+06	0	0	2.67142e+06	2492.53	6103810	6.75174e+06	764808	0	4.55886e+06	598197	0	0		0.351037	IM	0.416473	EM	0.597667	EM	0.638259	EM	0.993136	EM	0.94857	EM	1.14676	EM	0.814981	EM	1.17863	EM	1.06899	EM	0.89934	EM	1.11277	EM	1.14064	EM	1.1055	EM	0.958868	EM
33	1	0	2014478	3.26023e+06	0	952989	0	0	2434967	869.613	2.04713e+06	3683153	376998	0	183298	317013	0	0		0	UM	1.53224	EM	1.09682	EM	0.969336	EM	0.833585	EM	0.665031	EM	1.26354	EM	1.37412	EM	0.760656	EM	0.6632	EM	0.907515	EM	1.01465	EM	0.812168	EM	0.0822214	PM	0.939978	EM
34	1	1.29681e+06	2342471	2.51756e+06	0	1.2906e+06	0	0	2.16435e+06	1517.89	5.32461e+06	6888461	322790	0	1759889	83719.2	0	0		0.340302	PM	1.28285	EM	0.609826	EM	1.14071	EM	0.812813	EM	0.775195	EM	0.629029	EM	0.879417	EM	0.955956	EM	1.242	EM	1.22206	EM	0.625511	EM	0.754676	EM	0.568393	IM	0.178732	IM
35	1	1.44402e+06	263340	1.99043e+06	0	789689	0	0	1.54018e+06	682.384	1.536e+06	2.3017e+06	141412	0	1.58884e+06	182496	0	0		0.870251	IM	0.33121	EM	1.10728	EM	0.761033	EM	1.1422	EM	0.768385	EM	1.47348	EM	1.43722	EM	0.986991	EM	0.822832	EM	0.937789	EM	0.629344	EM	0.764965	EM	1.1785	EM	0.89478	EM
36	1	7751389	2018817	7070136	0	1.83614e+06	0	0	3.45127e+06	2001.42	9613998	6.93228e+06	925260	0	345341	741349	0	0		1.52166	EM	0.827083	EM	1.28116	EM	1.50769	EM	0.865079	EM	0.995637	EM	0.812756	EM	1.04905	EM	0.94295	EM	1.67761	EM	0.92002	EM	1.34131	EM	0.719648	EM	0.0834378	PM	1.184	EM
37	1	1.86497e+06	628378	1.27362e+06	0	874617	0	0	1.136e+06	714.957	1.15348e+06	2.40882e+06	142314	0	1199049	245612	0	0		1.13022	IM	0.794739	EM	0.712469	EM	0.701671	EM	1.27209	EM	0.626085	EM	1.2899	EM	1.06598	EM	1.03987	EM	0.621367	EM	0.986908	EM	0.636889	EM	0.809823	EM	0.894341	EM	1.21096	EM
38	1	2871385	687489	2.15471e+06	0	568979	0	0	1.1412e+06	818.195	2951368	1876791	292006	0	2.36174e+06	55154.1	0	0		1.13297	IM	0.566116	EM	0.78479	EM	0.782167	EM	0.538808	EM	0.836949	EM	0.960661	EM	0.697218	EM	0.774809	EM	1.03514	EM	0.50064	EM	0.850836	EM	0.702128	EM	1.14693	EM	0.177049	IM
39	1	1.62268e+06	1.11293e+06	1746038	0	614403	0	0	1.4888e+06	696.111	1.71566e+06	3176527	179514	0	600913	19669.5	0	0		0.705488	EM	1.00981	EM	0.700725	EM	0.890881	EM	0.641092	EM	1.42697	EM	0.585259	EM	1.00224	EM	0.72635	EM	0.663035	EM	0.933666	EM	0.576345	EM	1.07615	EM	0.321547	IM	0.0695728	PM
40	1	3.12833e+06	903154	2.99526e+06	0	525836	0	0	1.16956e+06	1279.03	2300086	3.3104e+06	440282	0	212828	248055	0	0		1.10548	IM	0.666063	EM	0.97704	PM	0.874323	EM	0.445966	EM	1.02879	EM	1.26577	EM	0.639942	EM	1.08476	EM	0.72249	EM	0.790867	EM	1.14894	EM	0.693708	EM	0.0925648	PM	0.713145	EM
41	1	1.02242e+06	953199	1.42959e+06	0	682666	0	0	763205	1165.9	2.68334e+06	2.47682e+06	180732	0	1107798	38029.8	0	0		0.615966	IM	1.19846	EM	0.795016	EM	0.99506	EM	0.987066	EM	1.91122	EM	0.863597	EM	0.711946	EM	1.68577	EM	1.43698	EM	1.0088	EM	0.804062	EM	0.752352	EM	0.821417	EM	0.186398	IM
42	1	1.6802e+06	1.14938e+06	1.58731e+06	0	411027	0	0	1.57211e+06	897.388	4.68311e+06	3.13453e+06	186976	0	1.51515e+06	39309.1	0	0		0.688907	IM	0.983507	EM	0.600757	EM	1.08079	EM	0.404465	EM	0.924523	EM	1.29713	EM	0.998069	EM	0.883061	EM	1.70679	EM	0.868871	EM	0.566125	EM	1.79503	EM	0.764596	EM	0.131124	IM
43	1	1.92796e+06	1.52304e+06	3.12082e+06	0	1.2274e+06	0	0	1.23962e+06	1129.53	3942418	2.67715e+06	329600	0	109429	29257.9	0	0		0.811671	IM	1.33815	EM	1.2128	EM	1.58014	EM	1.24016	EM	0.582966	EM	1.36621	EM	0.808068	EM	1.14127	EM	1.47534	EM	0.761968	EM	1.0247	EM	0.80862	EM	0.0567007	PM	0.10021	IM
44	1	0	1065786	1.82683e+06	0	1.00943e+06	0	0	763902	677.149	2.59374e+06	3.55444e+06	220666	0	812102	160532	0	0		0	UM	1.02017	EM	0.773437	EM	0.853279	EM	1.11116	EM	0.830942	EM	1.57354	EM	0.542507	EM	0.74539	EM	1.05745	EM	1.10215	EM	0.747398	EM	0.854753	EM	0.458432	IM	0.599016	EM
45	1	2.60893e+06	2.56634e+06	2.60143e+06	0	1861647	0	0	1.69815e+06	1218.91	3041588	2.23958e+06	474926	0	4.10625e+06	35083.3	0	0		0.847453	IM	1.73972	EM	0.780015	EM	1.34536	EM	1.45131	EM	0.7213	EM	1.06747	EM	0.854099	EM	0.950242	EM	0.878214	EM	0.491816	EM	1.13922	EM	2.33212	EM	1.64163	EM	0.0927133	IM
46	1	1.12653e+06	1.10066e+06	1340410	0	1.11601e+06	0	0	886517	1301.66	2.8279e+06	2.6825e+06	282889	0	158749	245229	0	0		0.602022	IM	1.22753	EM	0.661217	EM	0.988792	EM	1.43135	EM	1.15897	EM	0.973834	EM	0.733559	EM	1.66946	EM	1.34332	EM	0.96915	EM	1.11638	EM	0.857045	EM	0.104413	PM	1.06618	EM
47	1	2806164	625085	1833551	0	1.23623e+06	0	0	1.61226e+06	1195	2723441	3.54122e+06	389425	0	823994	272630	0	0		0.953789	IM	0.443396	EM	0.575268	EM	0.634354	EM	1.00844	EM	0.807857	EM	0.836456	EM	0.848505	EM	0.974804	EM	0.82282	EM	0.81372	EM	0.977441	EM	1.72124	EM	0.344699	IM	0.75388	EM
48	1	2.53276e+06	1.27922e+06	5.8412e+06	0	1.1633e+06	0	0	2.02602e+06	1032.69	3.19781e+06	7.04964e+06	296237	0	1.04002e+06	261149	0	0		0.811219	EM	0.855068	EM	1.72696	EM	0.839827	EM	0.894222	EM	1.00912	EM	0.637996	EM	1.00477	EM	0.793824	EM	0.910424	EM	1.52649	EM	0.700665	EM	0.900582	EM	0.409981	IM	0.680489	EM
49	1	4224080	1.27402e+06	4527660	0	2.20738e+06	0	0	3.17324e+06	2666.97	4.22046e+06	6.18484e+06	506381	0	947605	472324	0	0		1.06603	IM	0.671007	EM	1.05475	EM	0.74696	EM	1.33698	EM	1.38876	EM	0.994878	EM	1.23999	EM	1.61535	EM	0.94677	EM	1.05523	EM	0.943718	EM	1.1804	EM	0.294334	IM	0.969764	EM
50	1	1.60815e+06	1.28832e+06	2.40514e+06	0	977722	0	0	2.12135e+06	432.607	2.44575e+06	4.14122e+06	319843	0	798744	36891	0	0		0.71815	IM	1.20067	EM	0.99144	EM	1.18532	EM	1.04789	EM	0.852284	EM	1.46321	EM	1.46683	EM	0.463652	EM	0.97084	EM	1.25026	EM	1.05476	EM	1.22853	EM	0.439007	IM	0.134029	IM
51	1	2.50287e+06	1.08404e+06	804851	0	900680	0	0	1835133	1041.04	2679836	4263911	296799	0	154353	28576.3	0	0		1.03825	EM	0.938473	EM	0.308189	EM	0.834464	EM	0.896698	EM	1.06547	EM	0.776519	EM	1.17872	EM	1.03643	EM	0.988144	EM	1.19579	EM	0.90919	EM	1.09226	EM	0.0788055	PM	0.0964405	IM
52	1	1.61842e+06	774463	1.45429e+06	0	611746	0	0	2.17552e+06	487.503	1.9775e+06	1.81427e+06	205946	0	589023	37256.3	0	0		0.897133	EM	0.895942	EM	0.74414	EM	0.856621	EM	0.813857	EM	1.15597	EM	1.31208	EM	1.86728	EM	0.648566	EM	0.974382	EM	0.67991	EM	0.843037	EM	0.689667	EM	0.40186	IM	0.168018	IM
53	1	1.97137e+06	789847	788529	0	1.20781e+06	0	0	1.00087e+06	1546.75	2105224	3.04651e+06	211228	0	678585	46937.4	0	0		0.810192	EM	0.677449	EM	0.299141	EM	0.82386	EM	1.19132	EM	0.518566	EM	0.953128	EM	0.636907	EM	1.52564	EM	0.76907	EM	0.846459	EM	0.641063	EM	1.1528	EM	0.343243	IM	0.156938	IM
54	1	1.7748e+06	1.39128e+06	1.93682e+06	0	1465915	0	0	1.14744e+06	846.461	3.15853e+06	8100968	387328	0	998377	431422	0	0		0.558893	IM	0.914342	EM	0.562999	PM	0.953866	EM	1.1079	EM	1.14519	EM	0.954196	EM	0.559486	EM	0.639732	EM	0.884123	EM	1.72464	EM	0.900714	EM	1.07086	EM	0.386947	IM	1.10528	EM
55	1	4.25472e+06	2.87047e+06	4.66983e+06	0	2.44545e+06	0	0	4.68839e+06	2731.69	5.24678e+06	4.0262e+06	743345	0	2491410	338240	0	0		0.851593	IM	1.19902	EM	0.862781	EM	1.08044	EM	1.17471	EM	0.962744	EM	0.688973	EM	1.453	EM	1.31221	EM	0.933472	EM	0.544803	EM	1.0987	EM	0.993807	EM	0.613738	EM	0.550777	EM
56	1	713949	766562	3860309	0	1228219	0	0	1646740	713.895	2.82837e+06	2.55056e+06	292872	0	1.34074e+06	158694	0	0		0.288425	PM	0.64629	EM	1.43955	EM	1.24364	EM	1.19084	EM	0.815334	EM	0.841549	EM	1.03008	EM	0.692168	EM	1.01567	EM	0.696603	EM	0.873719	EM	0.844217	EM	0.666637	EM	0.521576	EM
57	1	947317	1.89264e+06	2.03458e+06	0	1.0872e+06	0	0	1.05264e+06	1187.26	2.08194e+06	3.06411e+06	418404	0	1576279	79803.5	0	0		0.389633	IM	1.62459	EM	0.772455	EM	0.617523	EM	1.07321	EM	0.762672	EM	0.873877	EM	0.670378	EM	1.17197	EM	0.761162	EM	0.852016	EM	1.27082	EM	0.822332	EM	0.79794	EM	0.267037	IM
58	1	1.01939e+06	2.5305e+06	4157827	0	2157923	0	0	3351105	1756.55	3018209	3.96886e+06	272249	0	877430	534232	0	0		0.300479	PM	1.55666	EM	1.1313	EM	0.736983	EM	1.52658	EM	1.0494	EM	0.940016	EM	1.52947	EM	1.24264	EM	0.790807	EM	0.790902	EM	0.592608	EM	1.03049	EM	0.318319	IM	1.28113	EM
59	1	2.37701e+06	1.519e+06	3.03012e+06	0	983231	0	0	1.27877e+06	1089.62	3.47279e+06	6.0198e+06	468548	0	2612052	289373	0	0		0.798218	IM	1.06454	EM	0.939263	EM	0.993533	EM	0.792423	EM	0.61795	EM	0.729137	EM	0.664907	EM	0.878163	EM	1.03661	EM	1.36664	EM	1.16191	EM	1.43132	EM	1.07956	EM	0.790564	EM
60	1	2.44722e+06	868940	3.92246e+06	0	1.62693e+06	0	0	1.88324e+06	1301.83	6415825	5.02929e+06	274129	0	947772	17767.4	0	0		0.875431	IM	0.648713	EM	1.29523	EM	0.598416	EM	1.39679	EM	1.15101	EM	1.13928	EM	1.04312	EM	1.11768	EM	2.04009	EM	1.2163	EM	0.724155	EM	0.529119	EM	0.417282	IM	0.0517087	PM
61	1	4440723	1.42836e+06	2795460	0	2273682	0	0	2.62824e+06	734.798	3568231	3391046	461300	0	109092	234749	0	0		1.35728	EM	0.911108	EM	0.788694	EM	0.825764	EM	1.66785	EM	0.702754	EM	1.46758	EM	1.24383	EM	0.53901	EM	0.969433	EM	0.700703	EM	1.04119	EM	1.15913	EM	0.0410379	PM	0.583729	EM
62	1	6017472	5.56666e+06	5332126	0	2.02008e+06	0	0	3253156	2094.65	5367526	7.89353e+06	621648	0	1.10353e+06	59310.6	0	0		1.41944	EM	2.74038	EM	1.16102	EM	1.00623	EM	1.14362	EM	0.620519	EM	0.724853	EM	1.18819	EM	1.18583	EM	1.12544	EM	1.2588	EM	1.08287	EM	0.772966	EM	0.320379	IM	0.113821	IM
63	1	3.24739e+06	1.09414e+06	3.6356e+06	0	1.74119e+06	0	0	1733860	1358.42	3.50103e+06	4891687	356775	0	235001	419887	0	0		0.925033	IM	0.650442	EM	0.955953	EM	0.80661	EM	1.19036	EM	0.891146	EM	0.870846	EM	0.764744	EM	0.928686	EM	0.886474	EM	0.942028	EM	0.75049	EM	0.854017	EM	0.0823888	PM	0.973069	EM
64	1	2882781	661898	1.33786e+06	0	824429	0	0	2364527	1110.28	1.82166e+06	6945568	303810	0	554037	359093	0	0		1.06038	EM	0.508105	EM	0.454255	EM	0.75549	EM	0.727803	EM	0.565518	EM	1.32752	EM	1.34671	EM	0.980153	EM	0.595614	EM	1.72719	EM	0.825239	EM	1.13688	EM	0.250821	IM	1.0746	EM
65	1	1.97782e+06	598130	2.33908e+06	0	787445	0	0	562812	858.982	1.45786e+06	4.2902e+06	222635	0	683112	211097	0	0		1.18899	EM	0.750413	EM	1.298	EM	1.25694	EM	1.13612	EM	1.16547	EM	0.948613	EM	0.523883	EM	1.23933	EM	0.779032	EM	1.74362	EM	0.988354	EM	0.754039	EM	0.505429	IM	1.03243	EM
66	1	913615	973531	1.62618e+06	0	738089	0	0	1.02414e+06	646.926	2792537	3.07276e+06	254304	0	1540862	445544	0	0		0.458069	IM	1.01866	EM	0.752617	EM	0.80336	EM	0.888154	EM	0.85161	EM	0.505655	EM	0.795072	EM	0.778456	EM	1.24456	EM	1.04155	EM	0.941564	EM	1.21493	EM	0.950842	EM	1.81739	EM
67	1	1.64646e+06	375580	1.38945e+06	0	529755	0	0	500944	433.697	1.35095e+06	2.05251e+06	139871	0	40404.1	133280	0	0		1.20538	EM	0.573834	EM	0.93897	EM	0.87606	EM	0.9308	EM	0.682271	EM	0.654057	EM	0.567856	EM	0.762022	EM	0.879139	EM	1.01587	EM	0.756181	EM	0.640281	EM	0.0364059	PM	0.793824	EM
68	1	1.96165e+06	3.5674e+06	5.89823e+06	0	1.57303e+06	0	0	1.98249e+06	902.599	3.96613e+06	3.39066e+06	712584	0	1.10778e+06	512539	0	0		0.503509	IM	1.91096	EM	1.39748	EM	0.697949	EM	0.969025	EM	1.31434	EM	1.0684	EM	0.787909	EM	0.556022	EM	0.904899	EM	0.588374	EM	1.35067	EM	0.8745	EM	0.349957	IM	1.07029	EM
69	1	1.30062e+06	831711	4607528	0	1.00885e+06	0	0	2.2375e+06	1994.61	3.50119e+06	4.32027e+06	389099	0	208872	451858	0	0		0.380779	PM	0.508171	EM	1.24517	EM	0.697303	EM	0.708859	EM	1.23263	EM	1.11086	EM	1.0143	EM	1.4015	EM	0.911143	EM	0.855101	EM	0.841223	EM	0.681072	EM	0.0752629	PM	1.07625	EM
70	1	1.57066e+06	961656	2.76297e+06	0	1.01853e+06	0	0	1.91593e+06	1472.45	2158622	4.9376e+06	423806	0	114663	424204	0	0		0.539148	IM	0.688903	EM	0.875464	EM	1.13839	EM	0.839089	EM	0.778915	EM	1.21818	EM	1.01832	EM	1.21305	EM	0.658642	EM	1.14584	EM	1.07429	EM	0.867967	EM	0.0484425	PM	1.18465	EM
71	1	2.37293e+06	1.37032e+06	1.49807e+06	0	655795	0	0	1.4111e+06	798.171	3020953	3.91746e+06	191588	0	3.3646e+06	451428	0	0		0.974613	IM	1.17458	EM	0.567959	PM	1.67725	EM	0.646437	EM	0.736917	EM	1.85599	EM	0.897397	EM	0.786782	EM	1.10291	EM	1.08776	EM	0.581091	EM	2.02794	EM	1.70081	EM	1.50843	EM
72	1	2.29624e+06	1.32876e+06	2637068	0	1997211	0	0	2.24852e+06	1189.14	3.64195e+06	4756473	580538	0	1.50903e+06	469202	0	0		0.783066	IM	0.945673	EM	0.830118	EM	0.608172	EM	1.63462	EM	0.84331	EM	1.012	EM	1.18729	EM	0.973253	EM	1.10398	EM	1.0966	EM	1.46197	EM	1.35839	EM	0.633368	EM	1.30176	EM
73	1	2.43617e+06	1.64442e+06	1.74481e+06	0	1.9697e+06	0	0	2.40153e+06	1334.04	5.61881e+06	4.85487e+06	485572	0	1.27138e+06	395775	0	0		0.613944	IM	0.864864	EM	0.405889	EM	1.32024	EM	1.19133	EM	0.862397	EM	0.819433	EM	0.937105	EM	0.806863	EM	1.25867	EM	0.827145	EM	0.903654	EM	0.925856	EM	0.394343	IM	0.811443	EM
74	1	2.06077e+06	583110	3.29941e+06	0	506693	0	0	1.48792e+06	1025.21	3242134	2.3604e+06	390618	0	745802	23428.3	0	0		0.901395	IM	0.532292	EM	1.33217	EM	1.11857	EM	0.531915	EM	0.775434	EM	0.703204	EM	1.00773	EM	1.07624	EM	1.26056	EM	0.697998	EM	1.26173	EM	1.37603	EM	0.4015	IM	0.0833711	PM
75	1	4.32464e+06	3.15326e+06	5106761	0	1893769	0	0	2.24817e+06	2116.36	8.00542e+06	5896122	1.03706e+06	0	2.23626e+06	492382	0	0		0.791314	EM	1.20413	EM	0.862545	EM	0.785669	EM	0.831643	EM	0.831963	EM	0.936688	EM	0.636953	EM	0.929392	EM	1.30206	EM	0.72937	EM	1.4013	EM	0.758014	EM	0.503613	IM	0.732977	EM
76	1	3151334	1.18041e+06	1.77801e+06	0	851500	0	0	1.83553e+06	1241.63	2.47932e+06	4.0244e+06	220672	0	1.78908e+06	39390.7	0	0		1.21997	IM	0.953671	EM	0.635368	PM	1.12793	EM	0.791132	EM	1.27724	EM	0.95701	EM	1.10026	EM	1.1536	EM	0.853165	EM	1.05326	EM	0.630852	EM	1.0813	EM	0.852432	EM	0.124061	IM
77	1	589746	714001	2230165	0	681714	0	0	1.33316e+06	1000.83	2.81562e+06	5756813	229849	0	1041517	264663	0	0		0.265935	PM	0.67193	EM	0.928296	EM	1.17903	EM	0.737777	EM	0.939114	EM	1.04732	EM	0.930835	EM	1.08314	EM	1.12858	EM	1.755	EM	0.765389	EM	0.882024	EM	0.578035	IM	0.970943	EM
78	1	773339	1.67621e+06	2.97607e+06	0	1349620	0	0	2369311	1288.17	6527868	5.05386e+06	610752	0	288580	57877.7	0	0		0.240533	PM	1.08804	EM	0.854447	EM	0.694102	EM	1.00746	EM	1.3889	EM	0.576886	EM	1.14105	EM	0.961585	EM	1.80478	EM	1.0627	EM	1.4028	EM	1.20193	EM	0.110471	PM	0.146455	IM
79	1	3176844	3.73821e+06	5.72402e+06	0	1.80887e+06	0	0	2.39937e+06	1412.91	4.74801e+06	4.24544e+06	383082	0	873657	104365	0	0		0.683855	IM	1.67936	EM	1.13738	EM	1.35534	EM	0.934519	EM	0.810877	EM	0.863017	EM	0.799732	EM	0.729954	EM	0.908506	EM	0.617837	EM	0.608959	EM	0.880877	EM	0.231465	IM	0.182772	IM
80	1	2.05866e+06	1.88741e+06	2.92722e+06	0	894029	0	0	1.38975e+06	633.606	1.64032e+06	2649898	193882	0	205664	340297	0	0		0.873927	EM	1.67213	EM	1.14706	EM	0.71961	EM	0.910864	EM	0.762923	EM	1.18762	EM	0.913494	EM	0.645537	EM	0.618966	EM	0.760506	EM	0.607794	EM	0.895822	EM	0.107455	PM	1.17527	EM
81	1	2.43388e+06	2.11064e+06	2.05418e+06	0	902921	0	0	2.20882e+06	1927.67	4.82546e+06	5704886	478010	0	1.19693e+06	55440.8	0	0		0.747062	IM	1.35203	EM	0.582015	EM	0.883594	EM	0.665148	EM	0.815576	EM	0.894893	EM	1.04978	EM	1.42004	EM	1.31657	EM	1.18382	EM	1.08348	EM	0.610885	EM	0.452171	IM	0.138444	IM
82	1	1.86404e+06	902716	1450939	0	1.05364e+06	0	0	2.46831e+06	1662.68	2.20196e+06	3.83296e+06	410636	0	719991	291476	0	0		0.657108	EM	0.664121	EM	0.472139	EM	0.819884	EM	0.891423	EM	0.677557	EM	1.08344	EM	1.34729	EM	1.4067	EM	0.689986	EM	0.91348	EM	1.06897	EM	0.699641	EM	0.312382	IM	0.835938	EM
83	1	1.71286e+06	1.07789e+06	4898439	0	773768	0	0	1.55625e+06	1389.19	2.79863e+06	3.41197e+06	391999	0	860711	492941	0	0		0.622864	IM	0.818011	EM	1.64425	EM	1.0174	EM	0.675295	EM	1.03297	EM	0.833915	EM	0.876258	EM	1.21239	EM	0.904618	EM	0.838803	EM	1.05265	EM	1.25178	EM	0.385217	IM	1.45833	EM
84	1	2.48511e+06	1.42101e+06	2.89483e+06	0	1.28374e+06	0	0	2.16868e+06	783.212	2828801	2.81118e+06	389364	0	824563	256387	0	0		0.885721	EM	1.05697	EM	0.952387	EM	2.05855	EM	1.0981	EM	1.35062	EM	0.868194	EM	1.19682	EM	0.66995	EM	0.896194	EM	0.677366	EM	1.02479	EM	0.930886	EM	0.361703	IM	0.743426	EM
85	1	2.72399e+06	849287	1.27524e+06	0	651659	0	0	988546	774.404	2.86816e+06	2017424	277186	0	103476	241446	0	0		1.21269	IM	0.789062	EM	0.524048	EM	0.809499	EM	0.696265	EM	0.547663	EM	0.726833	EM	0.681427	EM	0.827412	EM	1.135	EM	0.607188	EM	0.911261	EM	1.67938	EM	0.0566968	PM	0.874484	EM
86	1	2.02486e+06	536486	2.22944e+06	0	575904	0	0	1.72239e+06	1113.68	1.8659e+06	3565410	450524	0	155162	31520.8	0	0		0.979447	IM	0.541574	EM	0.995451	PM	0.983254	EM	0.668571	EM	0.921865	EM	0.746312	EM	1.29002	EM	1.29287	EM	0.802274	EM	1.16595	EM	1.60928	EM	1.27131	EM	0.0923734	PM	0.124043	IM
87	1	4846051	1.46761e+06	4319804	0	937790	0	0	1.47221e+06	2188.68	4.47953e+06	5796739	570256	0	339185	596781	0	0		1.24473	EM	0.786704	EM	1.02421	EM	1.30383	EM	0.578102	EM	1.10655	EM	1.16245	EM	0.585514	EM	1.34921	EM	1.02275	EM	1.00659	EM	1.08165	EM	1.06088	EM	0.107226	PM	1.24707	EM
88	1	4062350	2.53077e+06	4.79932e+06	0	1.18969e+06	0	0	3.4192e+06	2711.89	3393629	8068880	425754	0	2.84315e+06	85562	0	0		0.827396	IM	1.07573	EM	0.902305	EM	1.23166	EM	0.581542	EM	0.800051	EM	0.784415	EM	1.0783	EM	1.32562	EM	0.614395	EM	1.11105	EM	0.640358	EM	0.533061	EM	0.712709	IM	0.141777	IM
89	1	4067222	1999342	6387858	0	1.55086e+06	0	0	3191204	1102.59	3.83368e+06	4716349	715883	0	209191	549901	0	0		1.02004	EM	1.04645	EM	1.47881	EM	0.672424	EM	0.933474	EM	0.883097	EM	0.854414	EM	1.23923	EM	0.663656	EM	0.854639	EM	0.799664	EM	1.32583	EM	0.693887	EM	0.0645713	PM	1.122	EM
90	1	1928561	831020	1.80812e+06	0	517143	0	0	732271	436.87	1.40532e+06	2763245	198912	0	1.56255e+06	269717	0	0		1.11184	EM	0.999848	EM	0.962221	EM	1.46811	EM	0.715536	EM	0.939489	EM	0.952742	EM	0.653673	EM	0.604467	EM	0.720165	EM	1.07699	EM	0.846835	EM	1.42184	EM	1.10872	EM	1.26505	EM
91	1	2.85449e+06	1.10189e+06	2903314	0	1.0172e+06	0	0	2.18272e+06	1402.01	5.59912e+06	3338677	497736	0	1.03665e+06	70175.3	0	0		0.780174	EM	0.628515	EM	0.732477	EM	1.06356	EM	0.667239	EM	0.788596	EM	0.728187	EM	0.923718	EM	0.919652	EM	1.36028	EM	0.616907	EM	1.00459	EM	0.939093	EM	0.348714	IM	0.15604	IM
92	1	2.34479e+06	1.4709e+06	4.89295e+06	0	973532	0	0	1.55161e+06	2295.58	2743944	2.92057e+06	416276	0	123073	308218	0	0		0.736702	EM	0.964465	EM	1.41905	EM	1.10256	EM	0.734092	EM	0.721823	EM	0.837501	EM	0.754831	EM	1.73098	EM	0.766322	EM	0.620353	EM	0.965823	EM	1.09995	EM	0.0475914	PM	0.787838	EM
93	1	1.55712e+06	1.27392e+06	4601736	0	1.32757e+06	0	0	1.83556e+06	890.274	5.78197e+06	6.414e+06	494100	0	1.56652e+06	366936	0	0		0.455027	IM	0.776908	EM	1.2413	EM	0.319786	EM	0.931074	EM	0.938965	EM	0.561889	EM	0.830548	EM	0.624382	EM	1.50189	EM	1.26715	EM	1.06625	EM	0.851629	EM	0.563415	IM	0.872359	EM
94	1	3353673	2.20449e+06	4.86343e+06	0	1.38423e+06	0	0	3000018	1350.5	5.5934e+06	5.83209e+06	553472	0	2.43474e+06	49754.3	0	0		0.900012	EM	1.23467	EM	1.20478	EM	0.609531	EM	0.89155	EM	1.27206	EM	0.936951	EM	1.24661	EM	0.869831	EM	1.33429	EM	1.05812	EM	1.09686	EM	1.07927	EM	0.804188	EM	0.108629	IM
95	1	1.65735e+06	991364	2.22949e+06	0	863638	0	0	1.13511e+06	599.472	2271242	3.56338e+06	275163	0	561297	15979.1	0	0		0.876479	EM	1.09414	EM	1.08836	EM	0.905336	EM	1.09615	EM	1.03321	EM	0.800595	EM	0.929493	EM	0.760867	EM	1.06768	EM	1.27401	EM	1.0746	EM	0.762264	EM	0.36534	IM	0.0687497	PM
96	1	2.9089e+06	776401	2.53903e+06	0	2177051	0	0	1.41434e+06	1786.46	2.26296e+06	2.73762e+06	470453	0	90754.5	301161	0	0		1.04857	EM	0.584077	EM	0.844843	EM	0.964426	EM	1.88343	EM	1.14988	EM	1.01306	EM	0.789411	EM	1.54552	EM	0.725094	EM	0.667154	EM	1.25232	EM	1.51511	EM	0.0402639	PM	0.883198	EM
97	1	4.77629e+06	1.98547e+06	3.76614e+06	0	1.0145e+06	0	0	1.18497e+06	1548.37	2523411	3.68603e+06	459399	0	162216	45238.4	0	0		1.75274	IM	1.52056	EM	1.27573	EM	1.69327	EM	0.89349	EM	0.794026	EM	1.70535	EM	0.673305	EM	1.36368	EM	0.823117	EM	0.914465	EM	1.24493	EM	0.865056	EM	0.0732648	PM	0.135059	IM
98	1	793066	385335	846945	0	478855	0	0	622305	532.153	961126	1.25916e+06	135730	0	79473.3	155557	0	0		0.644745	IM	0.653779	EM	0.635582	EM	1.05701	EM	0.934316	EM	1.04749	EM	0.923277	EM	0.783361	EM	1.03831	EM	0.694555	EM	0.692057	EM	0.814856	EM	1.37149	EM	0.07952	PM	1.02886	EM
99	1	6199979	2.21105e+06	3.56603e+06	0	1.60215e+06	0	0	1.76394e+06	1370.95	3.89052e+06	4107454	601465	0	1.01232e+06	464130	0	0		1.37882	IM	1.02619	EM	0.732049	EM	0.738529	EM	0.855131	EM	0.657111	EM	0.402526	EM	0.607409	EM	0.731729	EM	0.769082	EM	0.617552	EM	0.98777	EM	1.09155	EM	0.277084	IM	0.839742	EM
100	1	2.07223e+06	908002	2.03948e+06	0	710002	0	0	1380202	1094.19	3.22937e+06	3.81319e+06	255591	0	1.89007e+06	210959	0	0		0.930475	EM	0.850878	EM	0.845327	EM	1.36731	EM	0.765136	EM	1.21404	EM	0.663272	EM	0.959598	EM	1.17916	EM	1.28894	EM	1.15755	EM	0.847502	EM	1.29369	EM	1.04453	EM	0.770645	EM
[truncated: 76 more columns]

## Sheet: Enzymatic Status Cytosolics
		Liver									Gut					Kidney
		Relative Enzyme Abundances									Relative Enzyme Abundances					Relative Enzyme Abundances
Index	Trial	User Cyt1	PM/EM/IM/UM	User Cyt2	PM/EM/IM/UM	User Cyt3	PM/EM/IM/UM	User Cyt4	PM/EM/IM/UM		Gut User Cyt1	Gut User Cyt2	Gut User Cyt3	Gut User Cyt4		Kidney User Cyt1	Kidney User Cyt2	Kidney User Cyt3	Kidney User Cyt4
1	1	1.42526	EM	0.412306	EM	1.21197	EM	0.858032	EM		0.906192	1.27424	0.43198	1.78201		1.0506	1.34247	0.806843	1.96428
2	1	0.50424	EM	0.607487	EM	1.07815	EM	1.18917	EM		1.42728	0.499213	0.894608	0.475662		0.9895	1.08487	0.7851	1.08701
3	1	0.495148	EM	0.849275	EM	0.852405	EM	0.664146	EM		0.422197	1.27258	1.94973	1.99834		0.644139	0.687764	1.07696	0.903595
4	1	0.808231	EM	1.27891	EM	1.55931	EM	1.02131	EM		0.428389	1.59436	0.327937	0.639961		0.994632	1.27362	1.13754	0.966171
5	1	2.20996	EM	0.904021	EM	0.609306	EM	1.04256	EM		1.42991	1.77606	0.262374	0.741136		1.00161	1.2893	0.632846	0.68392
6	1	0.96626	EM	1.14701	EM	0.705037	EM	0.686007	EM		0.944738	0.513881	1.83766	1.94255		0.864482	1.073	0.656961	0.68483
7	1	0.748168	EM	0.610793	EM	1.14948	EM	1.20974	EM		0.193432	2.16368	0.718718	0.636878		1.3769	1.37734	0.597327	0.729799
8	1	1.32728	EM	1.11795	EM	1.15335	EM	0.682085	EM		2.15577	1.08481	1.47608	0.735515		0.900423	0.972902	0.888888	1.06885
9	1	0.95843	EM	0.768029	EM	0.855267	EM	1.09667	EM		1.04751	0.316899	0.772901	0.49137		0.969288	1.53007	0.450111	0.589457
10	1	1.22906	EM	1.377	EM	1.16316	EM	0.621115	EM		1.49406	0.876405	0.735355	1.74062		0.767216	0.957997	0.89701	0.693763
11	1	1.49566	EM	0.970732	EM	1.11289	EM	1.37772	EM		1.09534	1.0278	1.20145	2.35078		0.938972	0.751904	1.80673	1.34392
12	1	0.562247	EM	0.618661	EM	0.844695	EM	1.15891	EM		0.565523	1.53503	0.64789	0.694649		1.08234	0.814116	0.969556	0.83116
13	1	0.840945	EM	0.71909	EM	1.08148	EM	0.992689	EM		1.56626	1.07287	1.64935	0.657882		0.99218	0.658166	1.1432	0.706664
14	1	1.26603	EM	0.702475	EM	0.807379	EM	1.34189	EM		1.91375	1.26823	0.327098	1.88368		0.45137	1.04671	1.22311	1.23832
15	1	0.796554	EM	0.823494	EM	0.762045	EM	0.995606	EM		0.755646	0.823497	1.42036	1.39846		0.602323	0.981366	1.45727	0.849625
16	1	0.903739	EM	1.0892	EM	0.991148	EM	0.967124	EM		0.406317	0.616452	0.568631	0.34179		1.08771	0.5265	1.10263	0.615216
17	1	0.788824	EM	1.11543	EM	1.36076	EM	0.644756	EM		1.24602	2.14974	1.41487	0.425158		1.51252	0.96667	0.816824	0.734464
18	1	0.813976	EM	1.31047	EM	0.629164	EM	0.824821	EM		1.30487	0.565272	0.335056	2.67099		0.958365	0.776871	0.872123	1.04566
19	1	0.867351	EM	1.4058	EM	0.935915	EM	0.86843	EM		1.05112	0.603533	0.687278	1.30898		0.642467	0.913962	0.554481	0.686982
20	1	1.47649	EM	1.30256	EM	1.00899	EM	0.836282	EM		0.81032	3.27684	1.04545	0.741739		0.46942	0.85693	0.84565	0.929441
21	1	0.730253	EM	0.848884	EM	1.06001	EM	1.10362	EM		0.831026	1.57767	1.14146	2.14212		1.40385	1.00569	0.729181	0.577525
22	1	1.1489	EM	1.46903	EM	0.67759	EM	1.00068	EM		0.964196	0.528042	0.914007	1.03896		1.04628	1.18676	1.46531	1.65538
23	1	0.760339	EM	0.765954	EM	0.612351	EM	1.10215	EM		1.04828	0.838161	0.682099	2.21338		1.16438	0.694415	1.05939	1.18871
24	1	0.89206	EM	0.546957	EM	1.18621	EM	1.1535	EM		0.947252	0.994091	1.54604	0.538301		1.46068	1.21491	1.50174	1.37797
25	1	0.71442	EM	1.40355	EM	1.04869	EM	0.604851	EM		2.36229	1.55055	0.411706	0.714909		2.38784	0.922719	0.94263	0.686076
26	1	0.902527	EM	0.804239	EM	0.654615	EM	0.909846	EM		0.593384	0.567604	1.2642	1.151		0.592127	1.30172	1.28408	0.913414
27	1	0.836107	EM	1.11602	EM	0.821204	EM	1.07116	EM		0.397797	1.31912	0.323177	1.66641		0.683417	0.90603	0.621583	0.62234
28	1	0.584785	EM	0.919067	EM	0.853094	EM	1.84901	EM		0.544857	0.799026	0.735066	0.504823		0.994238	1.39898	1.10464	1.1485
29	1	1.29195	EM	1.17468	EM	0.970985	EM	1.06824	EM		1.192	0.862217	1.32351	1.70012		1.19428	1.44425	0.507555	1.17574
30	1	0.841018	EM	0.751683	EM	1.19585	EM	1.29932	EM		0.775899	1.07654	1.11098	1.07293		0.895124	0.916947	0.837949	1.13885
31	1	0.675794	EM	1.27653	EM	0.959869	EM	0.736392	EM		0.708131	2.64655	0.67392	0.238626		0.897204	0.476796	0.851827	1.08693
32	1	0.58121	EM	1.39023	EM	0.625529	EM	0.683349	EM		0.957693	1.19864	1.4178	0.57533		1.45918	0.780952	1.2274	0.880656
33	1	1.33578	EM	0.577734	EM	1.28666	EM	0.84313	EM		1.28503	0.791423	0.998932	0.851482		0.715916	1.15941	0.805706	0.875164
34	1	0.8786	EM	1.42512	EM	0.815746	EM	1.30122	EM		0.567911	0.35817	1.2624	0.968241		1.11862	1.42761	1.93149	1.22239
35	1	0.735712	EM	0.932168	EM	1.20688	EM	0.849429	EM		0.997629	0.738602	1.06805	1.15489		0.851507	1.44112	1.30124	1.24285
36	1	1.62882	EM	0.930331	EM	1.0393	EM	0.983075	EM		0.375916	0.450417	1.21928	0.356842		0.640385	0.893258	0.733467	1.24899
37	1	1.36943	EM	1.59349	EM	0.547284	EM	1.23398	EM		1.02337	2.90829	0.770467	1.41632		0.819777	1.22881	0.642987	1.01685
38	1	1.89087	EM	1.40908	EM	1.0429	EM	0.870634	EM		0.417459	0.963437	1.55044	1.7445		0.889474	1.0728	0.896816	0.818984
39	1	0.530108	EM	0.857489	EM	0.754489	EM	0.865532	EM		1.29575	0.483177	0.770814	0.481154		0.91989	0.880241	0.779527	0.740992
40	1	1.20668	EM	1.01489	EM	0.856002	EM	0.760513	EM		0.610767	0.566577	0.211042	0.795439		1.62912	1.1435	0.725854	0.644185
41	1	0.641762	EM	0.945802	EM	1.0113	EM	0.860712	EM		0.544915	1.77383	0.858332	1.55641		1.07632	0.810847	0.821098	0.730955
42	1	1.0432	EM	0.79005	EM	0.961445	EM	1.44284	EM		0.575243	1.74132	0.475413	0.555372		0.813927	1.24364	0.897572	0.985298
43	1	1.13755	EM	1.28607	EM	0.783385	EM	0.819133	EM		1.42956	0.669514	0.857784	1.60447		0.800528	0.972354	0.867026	0.665322
44	1	0.942176	EM	0.882436	EM	1.11635	EM	0.721537	EM		0.527823	0.849757	1.29984	0.820382		1.3813	1.4993	0.83156	1.25246
45	1	0.822142	EM	0.769639	EM	0.961382	EM	0.787267	EM		0.909668	1.67986	0.857951	0.230316		1.7243	0.940674	0.653307	0.727971
46	1	0.939992	EM	0.699531	EM	1.19351	EM	0.671193	EM		0.585266	0.471398	0.59535	1.17136		0.918432	1.40278	0.879808	1.08446
47	1	0.502214	EM	1.48974	EM	0.668822	EM	0.861879	EM		0.597179	0.396326	1.51972	0.814315		1.20242	1.09395	0.69281	1.12009
48	1	0.936989	EM	1.12952	EM	1.00119	EM	1.11932	EM		0.713631	0.86406	1.25097	2.94627		0.786987	0.897412	0.589224	1.01695
49	1	0.95872	EM	0.712344	EM	1.10909	EM	0.874842	EM		0.896239	0.323885	1.3754	1.00615		1.00135	0.669449	1.10671	0.746893
50	1	0.875844	EM	0.414452	EM	0.916912	EM	0.607288	EM		1.70067	1.38059	0.977241	0.38604		0.900458	0.609392	0.793267	0.737034
51	1	1.19077	EM	0.892846	EM	0.666135	EM	0.896547	EM		0.778727	0.357904	0.752178	0.664641		1.13152	0.985081	0.923341	0.587296
52	1	1.24501	EM	1.11231	EM	1.27911	EM	0.679569	EM		0.333689	0.688112	0.370022	0.439519		1.11021	1.30026	0.705388	1.03042
53	1	0.943292	EM	0.904824	EM	0.616366	EM	0.972748	EM		0.695133	0.893478	1.06734	0.189703		0.843697	0.655784	0.83141	1.70512
54	1	1.36145	EM	0.684583	EM	0.948562	EM	0.658154	EM		2.44738	1.05876	1.51975	0.430817		0.942645	1.38612	0.731357	1.22087
55	1	0.802188	EM	1.1654	EM	0.76924	EM	0.944941	EM		0.628389	1.60851	0.852612	2.04719		1.11056	1.6294	1.22948	0.587807
56	1	1.09992	EM	1.50476	EM	0.589553	EM	0.581074	EM		1.52164	0.51857	0.867079	0.759332		1.10249	1.04611	0.94891	0.921826
57	1	1.36327	EM	0.688771	EM	1.11992	EM	0.870623	EM		0.980315	1.04017	1.47229	0.968358		0.854268	0.907608	1.33593	0.786132
58	1	0.765637	EM	0.684831	EM	0.912343	EM	1.36373	EM		2.47649	5.533	1.04411	1.33853		0.949001	1.70153	1.86972	1.14099
59	1	0.704021	EM	0.903123	EM	1.08126	EM	0.686259	EM		0.736445	0.685956	1.23478	0.784829		0.721325	0.940256	0.857514	0.811105
60	1	1.12039	EM	0.737889	EM	1.07877	EM	1.56189	EM		0.442258	1.42426	0.70578	0.673696		1.01351	1.03333	1.23058	0.932488
61	1	0.87683	EM	0.8434	EM	1.15876	EM	1.20352	EM		0.230872	0.822611	0.619269	1.15465		0.445198	0.43895	1.14777	0.715034
62	1	1.07719	EM	1.16087	EM	0.759409	EM	1.61799	EM		1.18105	0.532506	1.538	0.919478		0.795955	0.693559	0.695945	1.25669
63	1	0.695579	EM	0.354498	EM	1.58327	EM	1.51957	EM		1.54162	1.03088	0.701311	0.463948		1.26137	0.756935	1.17511	0.960372
64	1	0.677313	EM	1.37033	EM	0.988428	EM	1.3173	EM		1.26568	0.995486	0.453133	0.617152		0.822299	0.650516	1.15566	0.901631
65	1	1.06855	EM	0.591772	EM	0.979016	EM	0.915749	EM		0.934342	0.483585	0.588129	0.516072		1.15796	1.3857	1.08909	0.795878
66	1	1.02864	EM	1.20727	EM	1.09021	EM	1.10644	EM		0.614114	1.3901	0.630107	0.677747		1.07617	1.31804	0.773913	0.741853
67	1	0.692467	EM	0.681098	EM	0.830231	EM	0.661482	EM		0.646458	0.61656	1.302	0.413265		1.00327	1.01477	0.841195	1.59373
68	1	0.889756	EM	0.810096	EM	0.789641	EM	0.708636	EM		0.555764	0.360341	0.724046	0.488882		3.21828	1.16887	0.804329	0.830609
69	1	1.41276	EM	1.30207	EM	1.46039	EM	0.835999	EM		0.391414	1.37706	1.43902	0.603143		1.82409	0.945401	0.692895	0.918387
70	1	1.53813	EM	0.906546	EM	0.736546	EM	0.499917	EM		0.735098	1.12032	1.2228	1.10952		0.900377	1.04936	1.47969	0.673505
71	1	0.739803	EM	0.574915	EM	0.683284	EM	1.29916	EM		0.529978	1.0825	0.368688	1.0645		0.972366	0.967085	1.09935	0.914476
72	1	0.781188	EM	0.771724	EM	0.803819	EM	0.874593	EM		1.20423	0.35822	1.37281	0.746203		1.09424	0.852742	0.842911	1.09656
73	1	1.61238	EM	1.02912	EM	0.854389	EM	1.14544	EM		0.649489	0.775394	0.829467	1.25092		1.01972	0.909276	1.08417	1.09748
74	1	1.01855	EM	0.813005	EM	0.83654	EM	0.895268	EM		0.906005	0.817187	0.883584	0.65645		1.66782	0.862309	0.82583	0.690494
75	1	0.890221	EM	1.42583	EM	0.717538	EM	1.25923	EM		0.920343	0.830322	0.272315	0.702539		1.37386	0.721792	1.17773	0.749752
76	1	0.609458	EM	0.966082	EM	0.633545	EM	0.97122	EM		0.760824	0.762821	2.69906	1.54413		0.734385	0.512487	0.766351	1.19482
77	1	0.436684	EM	0.973276	EM	1.09214	EM	0.801136	EM		0.524746	1.02998	0.975565	1.30385		1.52412	1.55716	0.911246	1.06885
78	1	1.59288	EM	1.35665	EM	1.36744	EM	1.15646	EM		1.05568	0.799714	0.424959	1.64199		1.11711	0.989428	0.731439	0.946736
79	1	0.568515	EM	0.855734	EM	1.53851	EM	0.714121	EM		0.909136	0.882393	1.3077	0.972031		0.646872	1.45993	0.772524	1.03467
80	1	0.796076	EM	0.564243	EM	0.66499	EM	1.05183	EM		1.06833	1.64395	0.806727	1.00117		0.883438	1.22434	0.872402	1.28955
81	1	0.681466	EM	1.2384	EM	0.770961	EM	0.789737	EM		0.456941	1.75383	0.783442	2.3058		0.630107	1.30719	0.878234	0.867047
82	1	1.28053	EM	1.40741	EM	0.878361	EM	1.33009	EM		0.39478	0.441163	1.47809	1.42477		1.17251	1.33496	0.986192	0.864026
83	1	0.784472	EM	0.558284	EM	1.06104	EM	1.14357	EM		2.809	0.391036	0.821901	0.834498		1.2788	1.40137	1.0715	0.823169
84	1	0.743623	EM	1.0272	EM	0.716509	EM	1.25332	EM		0.87599	1.52187	1.7156	1.05325		1.00913	0.697667	0.871368	1.19631
85	1	0.873775	EM	0.815769	EM	1.35193	EM	0.524355	EM		1.05405	0.847159	0.604378	0.447662		1.03176	1.22327	0.922084	0.979215
86	1	1.27845	EM	1.3677	EM	0.953886	EM	1.56455	EM		0.506916	0.650628	0.595445	1.40145		0.672284	1.38037	0.879949	0.4851
87	1	0.924398	EM	0.8942	EM	1.52653	EM	0.867661	EM		1.06296	1.35731	1.06671	0.465913		0.650565	0.728922	1.03551	1.62354
88	1	1.1776	EM	1.38311	EM	1.1325	EM	0.753975	EM		0.475603	0.89164	0.675922	1.97845		1.50662	0.59885	1.23803	1.31899
89	1	1.06101	EM	0.876057	EM	1.30392	EM	1.51864	EM		1.76465	1.14969	1.45739	1.35622		1.31969	0.747534	0.374014	0.79181
90	1	1.69465	EM	1.02961	EM	0.915939	EM	1.13833	EM		0.417269	1.58169	0.891024	0.499809		1.53585	1.06426	1.10152	0.802674
91	1	0.806841	EM	1.03998	EM	0.826689	EM	0.514234	EM		1.28527	0.384198	0.696615	1.21087		1.45975	1.52961	0.873575	1.0489
92	1	1.1487	EM	0.821158	EM	1.54082	EM	0.712455	EM		0.561602	1.25354	0.489213	0.415034		1.01188	0.802958	1.39085	0.980992
93	1	1.10053	EM	0.666514	EM	0.81549	EM	1.62535	EM		0.395109	0.302689	0.437956	1.69668		1.06329	0.723476	0.899485	1.01307
94	1	0.674226	EM	1.34093	EM	1.11625	EM	0.599813	EM		0.960721	0.954932	0.629555	1.03088		0.696097	1.32956	1.30386	0.877234
95	1	0.716637	EM	1.32006	EM	0.720204	EM	0.839022	EM		0.436701	0.718097	0.482581	2.495		0.82914	1.10971	2.032	1.0314
96	1	0.796123	EM	0.916398	EM	0.967684	EM	0.560485	EM		0.697361	0.687236	0.970683	0.973795		0.949499	0.930372	1.48185	1.00037
97	1	0.83486	EM	1.14605	EM	1.48701	EM	0.567724	EM		1.29313	1.18978	3.04885	1.22376		1.0114	1.17026	0.952271	0.864176
98	1	0.607509	EM	0.564922	EM	0.494643	EM	1.07541	EM		0.894717	1.66256	0.522583	0.458679		0.634966	0.77143	1.30688	1.02658
99	1	0.634322	EM	1.02724	EM	0.670263	EM	0.733964	EM		0.576056	0.961207	0.56673	0.435822		1.40957	0.626998	1.88913	0.74544
100	1	0.842718	EM	1.08305	EM	0.925811	EM	1.04243	EM		1.84879	0.490068	1.64031	1.76811		0.746348	0.887055	0.889498	1.28187

## Sheet: Transporter Status
		Phenotype status (ET/PT/IT/UT)
Index	Trial	ABCB1 (P-gp)	ABCC2 (MRP2)	ABCC3 (MRP3)	ABCC4 (MRP4)	ABCG2 (BCRP)	SLCO1B1 (OATP1B1)	SLCO1B3 (OATP1B3)	SLC22A1 (OCT1)	SLC22A2 (OCT2)	SLC22A6 (OAT1)	SLC22A8 (OAT3)	SLC47As (MATEs)	Apical Influx	Apical Influx (Kidney)	Basal Efflux (Kidney)
1	1	ET	ET	ET	ET	ET	IT	ET	ET	ET	ET	ET	ET	ET	ET	ET
2	1	ET	ET	ET	ET	ET	ET	ET	ET	ET	ET	ET	ET	ET	ET	ET
3	1	ET	ET	ET	ET	ET	ET	ET	ET	ET	ET	ET	ET	ET	ET	ET
4	1	ET	ET	ET	ET	ET	ET	ET	ET	ET	ET	ET	ET	ET	ET	ET
5	1	ET	ET	ET	ET	ET	IT	ET	ET	ET	ET	ET	ET	ET	ET	ET
6	1	ET	ET	ET	ET	ET	ET	ET	ET	ET	ET	ET	ET	ET	ET	ET
7	1	ET	ET	ET	ET	ET	ET	ET	ET	ET	ET	ET	ET	ET	ET	ET
8	1	ET	ET	ET	ET	ET	ET	ET	ET	ET	ET	ET	ET	ET	ET	ET
9	1	ET	ET	ET	ET	ET	ET	ET	ET	ET	ET	ET	ET	ET	ET	ET
10	1	ET	ET	ET	ET	ET	ET	ET	ET	ET	ET	ET	ET	ET	ET	ET
11	1	ET	ET	ET	ET	ET	UT	ET	ET	ET	ET	ET	ET	ET	ET	ET
12	1	ET	ET	ET	ET	ET	ET	ET	ET	ET	ET	ET	ET	ET	ET	ET
13	1	ET	ET	ET	ET	ET	ET	ET	ET	ET	ET	ET	ET	ET	ET	ET
14	1	ET	ET	ET	ET	ET	ET	ET	ET	ET	ET	ET	ET	ET	ET	ET
15	1	ET	ET	ET	ET	ET	ET	ET	ET	ET	ET	ET	ET	ET	ET	ET
16	1	ET	ET	ET	ET	ET	ET	ET	ET	ET	ET	ET	ET	ET	ET	ET
17	1	ET	ET	ET	ET	ET	ET	ET	ET	ET	ET	ET	ET	ET	ET	ET
18	1	ET	ET	ET	ET	ET	PT	ET	ET	ET	ET	ET	ET	ET	ET	ET
19	1	ET	ET	ET	ET	ET	IT	ET	ET	ET	ET	ET	ET	ET	ET	ET
20	1	ET	ET	ET	ET	ET	IT	ET	ET	ET	ET	ET	ET	ET	ET	ET
21	1	ET	ET	ET	ET	ET	IT	ET	ET	ET	ET	ET	ET	ET	ET	ET
22	1	ET	ET	ET	ET	ET	IT	ET	ET	ET	ET	ET	ET	ET	ET	ET
23	1	ET	ET	ET	ET	ET	ET	ET	ET	ET	ET	ET	ET	ET	ET	ET
24	1	ET	ET	ET	ET	ET	IT	ET	ET	ET	ET	ET	ET	ET	ET	ET
25	1	ET	ET	ET	ET	ET	ET	ET	ET	ET	ET	ET	ET	ET	ET	ET
26	1	ET	ET	ET	ET	ET	IT	ET	ET	ET	ET	ET	ET	ET	ET	ET
27	1	ET	ET	ET	ET	ET	ET	ET	ET	ET	ET	ET	ET	ET	ET	ET
28	1	ET	ET	ET	ET	ET	ET	ET	ET	ET	ET	ET	ET	ET	ET	ET
29	1	ET	ET	ET	ET	ET	ET	ET	ET	ET	ET	ET	ET	ET	ET	ET
30	1	ET	ET	ET	ET	ET	IT	ET	ET	ET	ET	ET	ET	ET	ET	ET
31	1	ET	ET	ET	ET	ET	UT	ET	ET	ET	ET	ET	ET	ET	ET	ET
32	1	ET	ET	ET	ET	ET	ET	ET	ET	ET	ET	ET	ET	ET	ET	ET
33	1	ET	ET	ET	ET	ET	ET	ET	ET	ET	ET	ET	ET	ET	ET	ET
34	1	ET	ET	ET	ET	ET	ET	ET	ET	ET	ET	ET	ET	ET	ET	ET
35	1	ET	ET	ET	ET	ET	ET	ET	ET	ET	ET	ET	ET	ET	ET	ET
36	1	ET	ET	ET	ET	ET	ET	ET	ET	ET	ET	ET	ET	ET	ET	ET
37	1	ET	ET	ET	ET	ET	ET	ET	ET	ET	ET	ET	ET	ET	ET	ET
38	1	ET	ET	ET	ET	ET	ET	ET	ET	ET	ET	ET	ET	ET	ET	ET
39	1	ET	ET	ET	ET	ET	ET	ET	ET	ET	ET	ET	ET	ET	ET	ET
40	1	ET	ET	ET	ET	ET	UT	ET	ET	ET	ET	ET	ET	ET	ET	ET
41	1	ET	ET	ET	ET	ET	PT	ET	ET	ET	ET	ET	ET	ET	ET	ET
42	1	ET	ET	ET	ET	ET	ET	ET	ET	ET	ET	ET	ET	ET	ET	ET
43	1	ET	ET	ET	ET	ET	IT	ET	ET	ET	ET	ET	ET	ET	ET	ET
44	1	ET	ET	ET	ET	ET	IT	ET	ET	ET	ET	ET	ET	ET	ET	ET
45	1	ET	ET	ET	ET	ET	ET	ET	ET	ET	ET	ET	ET	ET	ET	ET
46	1	ET	ET	ET	ET	ET	ET	ET	ET	ET	ET	ET	ET	ET	ET	ET
47	1	ET	ET	ET	ET	ET	ET	ET	ET	ET	ET	ET	ET	ET	ET	ET
48	1	ET	ET	ET	ET	ET	IT	ET	ET	ET	ET	ET	ET	ET	ET	ET
49	1	ET	ET	ET	ET	ET	ET	ET	ET	ET	ET	ET	ET	ET	ET	ET
50	1	ET	ET	ET	ET	ET	ET	ET	ET	ET	ET	ET	ET	ET	ET	ET
51	1	ET	ET	ET	ET	ET	ET	ET	ET	ET	ET	ET	ET	ET	ET	ET
52	1	ET	ET	ET	ET	ET	ET	ET	ET	ET	ET	ET	ET	ET	ET	ET
53	1	ET	ET	ET	ET	ET	ET	ET	ET	ET	ET	ET	ET	ET	ET	ET
54	1	ET	ET	ET	ET	ET	ET	ET	ET	ET	ET	ET	ET	ET	ET	ET
55	1	ET	ET	ET	ET	ET	IT	ET	ET	ET	ET	ET	ET	ET	ET	ET
56	1	ET	ET	ET	ET	ET	ET	ET	ET	ET	ET	ET	ET	ET	ET	ET
57	1	ET	ET	ET	ET	ET	UT	ET	ET	ET	ET	ET	ET	ET	ET	ET
58	1	ET	ET	ET	ET	ET	ET	ET	ET	ET	ET	ET	ET	ET	ET	ET
59	1	ET	ET	ET	ET	ET	ET	ET	ET	ET	ET	ET	ET	ET	ET	ET
60	1	ET	ET	ET	ET	ET	ET	ET	ET	ET	ET	ET	ET	ET	ET	ET
61	1	ET	ET	ET	ET	ET	ET	ET	ET	ET	ET	ET	ET	ET	ET	ET
62	1	ET	ET	ET	ET	ET	ET	ET	ET	ET	ET	ET	ET	ET	ET	ET
63	1	ET	ET	ET	ET	ET	ET	ET	ET	ET	ET	ET	ET	ET	ET	ET
64	1	ET	ET	ET	ET	ET	ET	ET	ET	ET	ET	ET	ET	ET	ET	ET
65	1	ET	ET	ET	ET	ET	PT	ET	ET	ET	ET	ET	ET	ET	ET	ET
66	1	ET	ET	ET	ET	ET	ET	ET	ET	ET	ET	ET	ET	ET	ET	ET
67	1	ET	ET	ET	ET	ET	IT	ET	ET	ET	ET	ET	ET	ET	ET	ET
68	1	ET	ET	ET	ET	ET	ET	ET	ET	ET	ET	ET	ET	ET	ET	ET
69	1	ET	ET	ET	ET	ET	ET	ET	ET	ET	ET	ET	ET	ET	ET	ET
70	1	ET	ET	ET	ET	ET	ET	ET	ET	ET	ET	ET	ET	ET	ET	ET
71	1	ET	ET	ET	ET	ET	ET	ET	ET	ET	ET	ET	ET	ET	ET	ET
72	1	ET	ET	ET	ET	ET	ET	ET	ET	ET	ET	ET	ET	ET	ET	ET
73	1	ET	ET	ET	ET	ET	UT	ET	ET	ET	ET	ET	ET	ET	ET	ET
74	1	ET	ET	ET	ET	ET	IT	ET	ET	ET	ET	ET	ET	ET	ET	ET
75	1	ET	ET	ET	ET	ET	ET	ET	ET	ET	ET	ET	ET	ET	ET	ET
76	1	ET	ET	ET	ET	ET	ET	ET	ET	ET	ET	ET	ET	ET	ET	ET
77	1	ET	ET	ET	ET	ET	IT	ET	ET	ET	ET	ET	ET	ET	ET	ET
78	1	ET	ET	ET	ET	ET	ET	ET	ET	ET	ET	ET	ET	ET	ET	ET
79	1	ET	ET	ET	ET	ET	IT	ET	ET	ET	ET	ET	ET	ET	ET	ET
80	1	ET	ET	ET	ET	ET	ET	ET	ET	ET	ET	ET	ET	ET	ET	ET
81	1	ET	ET	ET	ET	ET	ET	ET	ET	ET	ET	ET	ET	ET	ET	ET
82	1	ET	ET	ET	ET	ET	ET	ET	ET	ET	ET	ET	ET	ET	ET	ET
83	1	ET	ET	ET	ET	ET	ET	ET	ET	ET	ET	ET	ET	ET	ET	ET
84	1	ET	ET	ET	ET	ET	ET	ET	ET	ET	ET	ET	ET	ET	ET	ET
85	1	ET	ET	ET	ET	ET	IT	ET	ET	ET	ET	ET	ET	ET	ET	ET
86	1	ET	ET	ET	ET	ET	ET	ET	ET	ET	ET	ET	ET	ET	ET	ET
87	1	ET	ET	ET	ET	ET	IT	ET	ET	ET	ET	ET	ET	ET	ET	ET
88	1	ET	ET	ET	ET	ET	PT	ET	ET	ET	ET	ET	ET	ET	ET	ET
89	1	ET	ET	ET	ET	ET	ET	ET	ET	ET	ET	ET	ET	ET	ET	ET
90	1	ET	ET	ET	ET	ET	IT	ET	ET	ET	ET	ET	ET	ET	ET	ET
91	1	ET	ET	ET	ET	ET	ET	ET	ET	ET	ET	ET	ET	ET	ET	ET
92	1	ET	ET	ET	ET	ET	PT	ET	ET	ET	ET	ET	ET	ET	ET	ET
93	1	ET	ET	ET	ET	ET	ET	ET	ET	ET	ET	ET	ET	ET	ET	ET
94	1	ET	ET	ET	ET	ET	ET	ET	ET	ET	ET	ET	ET	ET	ET	ET
95	1	ET	ET	ET	ET	ET	IT	ET	ET	ET	ET	ET	ET	ET	ET	ET
96	1	ET	ET	ET	ET	ET	ET	ET	ET	ET	ET	ET	ET	ET	ET	ET
97	1	ET	ET	ET	ET	ET	ET	ET	ET	ET	ET	ET	ET	ET	ET	ET
98	1	ET	ET	ET	ET	ET	ET	ET	ET	ET	ET	ET	ET	ET	ET	ET
99	1	ET	ET	ET	ET	ET	ET	ET	ET	ET	ET	ET	ET	ET	ET	ET
100	1	ET	ET	ET	ET	ET	ET	ET	ET	ET	ET	ET	ET	ET	ET	ET

## Sheet: Enzymes’ Turnover
					Enzyme Turnover (1/h)
		Liver													Gut
Index	Trial	CYP1A2	CYP2A6	CYP2B6	CYP2C8	CYP2C9	CYP2C18	CYP2C19	CYP2D6	CYP2E1	CYP2J2	CYP3A4	CYP3A5	CYP3A7	CYP2C9	CYP2C19	CYP2D6	CYP2J2	CYP3A4	CYP3A5
1	1	0.0239021	0.0207367	0.025686	0.00938428	0.00944706	0.0381555	0.0125624	0.0102025	0.00579567	0.0275517	0.0245257	0.0156428	0.0113274	0.0269823	0.0368103	0.0309848	0.0309975	0.0263101	0.0289797
2	1	0.0187881	0.00852737	0.0119124	0.0126246	0.00682597	0.022524	0.0458222	0.00302657	0.0225371	0.0153783	0.0226191	0.0301387	0.0141917	0.0216846	0.0203743	0.0296824	0.0247959	0.0304134	0.0230079
3	1	0.0227983	0.0172233	0.0120269	0.0663591	0.011488	0.0219615	0.0231307	0.00427327	0.0137541	0.00950137	0.00314425	0.0107824	0.0162404	0.0341292	0.029582	0.0375196	0.0287272	0.0322792	0.0185952
4	1	0.0195696	0.0353577	0.0232892	0.014321	0.00543167	0.0113579	0.0212416	0.00873708	0.0205578	0.0212347	0.00894047	0.0584897	0.0120417	0.0228533	0.0370363	0.0293749	0.024105	0.0341684	0.0394318
5	1	0.0190746	0.0408141	0.0515016	0.0254652	0.00438754	0.00658784	0.0190614	0.00653333	0.0104634	0.0272607	0.0156046	0.00952099	0.0283842	0.026008	0.0251779	0.0231633	0.0294156	0.0304637	0.0275081
6	1	0.0219394	0.0196636	0.0538421	0.0228165	0.00558573	0.00883205	0.064047	0.00499482	0.00704672	0.0123189	0.0206506	0.0107644	0.0105908	0.0287945	0.0377784	0.0352024	0.0306506	0.0296578	0.0324035
7	1	0.0075983	0.0174125	0.0281132	0.0375267	0.00509221	0.068392	0.0330682	0.0371521	0.0114891	0.0268402	0.0166407	0.0044253	0.0149621	0.027363	0.0279663	0.0332943	0.0220066	0.0266935	0.021956
8	1	0.0195936	0.029027	0.0447957	0.0580675	0.00770322	0.0430798	0.058878	0.0088579	0.0397986	0.0143002	0.00950793	0.00671201	0.0204513	0.0210613	0.0243592	0.0353476	0.0222486	0.0264246	0.0256967
9	1	0.0057875	0.0175692	0.0125012	0.0433577	0.0140083	0.00904212	0.0253226	0.00737182	0.0101117	0.00965437	0.0113718	0.0035095	0.0170097	0.0335181	0.0301993	0.0409692	0.0230882	0.0237791	0.0325406
10	1	0.0199821	0.0168917	0.0197621	0.016367	0.0154297	0.0170629	0.0233038	0.00796088	0.0110456	0.0282115	0.00807887	0.0176075	0.0532927	0.0217409	0.0340685	0.0347182	0.0309398	0.0434327	0.0212175
11	1	0.0130103	0.0105665	0.0268568	0.0233795	0.00716901	0.0439764	0.0114879	0.00761078	0.0107867	0.0082878	0.0391094	0.0210687	0.0108345	0.0312144	0.0426585	0.0308032	0.0229736	0.0264573	0.0291068
12	1	0.0165203	0.0109087	0.0392893	0.0242862	0.0140562	0.0383384	0.0292392	0.00731221	0.0423359	0.0275039	0.00910004	0.0127821	0.0122733	0.0162072	0.0258305	0.0232682	0.0221012	0.026195	0.0252678
13	1	0.00789737	0.0127003	0.0307314	0.022205	0.00684013	0.0254333	0.0170587	0.0128042	0.00764613	0.0359874	0.0124611	0.0162691	0.0256454	0.0300915	0.0265252	0.0356339	0.0341255	0.0245173	0.0366868
14	1	0.00908573	0.0193226	0.0124403	0.030676	0.00862849	0.0676002	0.0439812	0.00760911	0.0174467	0.0210904	0.0125486	0.0106387	0.0133911	0.0315005	0.033206	0.0280588	0.0314673	0.0276558	0.0326174
15	1	0.00959169	0.013476	0.0194921	0.0228657	0.0109031	0.0333931	0.0297973	0.00629024	0.0186434	0.0122788	0.0056187	0.0213268	0.00692867	0.0352551	0.0200627	0.0299176	0.0312095	0.0278027	0.0266147
16	1	0.0141309	0.0143239	0.013053	0.0619563	0.00361572	0.0183422	0.00737087	0.00897627	0.0204525	0.0189352	0.0187387	0.0141455	0.0273539	0.0485878	0.0371167	0.0331112	0.0316452	0.0363501	0.0273698
17	1	0.0208595	0.0155406	0.0194415	0.032207	0.00742413	0.0120646	0.0317517	0.00420432	0.0144816	0.0178889	0.0412303	0.0417381	0.0302852	0.0271918	0.0372735	0.0364569	0.0306237	0.0304858	0.0280499
18	1	0.0328585	0.0142952	0.0131256	0.0153514	0.00547471	0.0260939	0.0216319	0.0029812	0.0274361	0.0112918	0.00774848	0.00765162	0.00630807	0.0311806	0.0264411	0.0418381	0.0295804	0.036956	0.0269688
19	1	0.0216776	0.0365007	0.00945	0.0413206	0.0314168	0.0213211	0.0315497	0.0120325	0.0149191	0.0145305	0.00674679	0.0235361	0.00469928	0.0438937	0.0392359	0.0419675	0.0343352	0.0343893	0.0360991
20	1	0.0109067	0.0224129	0.0095997	0.0250744	0.00604895	0.0324391	0.012075	0.00296064	0.0172541	0.00946544	0.0092936	0.00999695	0.0146603	0.0282138	0.0251211	0.0370152	0.0303533	0.0331113	0.0313251
21	1	0.00922894	0.00583882	0.0185714	0.033195	0.00474048	0.0284014	0.0217036	0.0148039	0.0115148	0.0185455	0.0188875	0.0143963	0.0160468	0.0226699	0.0425076	0.0385011	0.0398006	0.0317115	0.0313399
22	1	0.0277048	0.0150777	0.0125073	0.0318499	0.00934349	0.0088625	0.0301275	0.0144441	0.0119052	0.0146232	0.0217286	0.020164	0.00892614	0.0252998	0.0411268	0.0323932	0.0310736	0.0298334	0.0360936
23	1	0.011054	0.022029	0.0435141	0.0146089	0.00387867	0.0290128	0.0290766	0.00760785	0.00705212	0.0220281	0.00481761	0.026266	0.00878559	0.033155	0.0305656	0.0263618	0.0274089	0.037513	0.028236
24	1	0.010198	0.0244816	0.0101401	0.0186042	0.00367443	0.0469107	0.0113002	0.00584053	0.0172883	0.0288496	0.00634205	0.0289932	0.0240528	0.0272225	0.0200812	0.0319458	0.0323773	0.0290433	0.0235649
25	1	0.00887804	0.0175867	0.046452	0.0157769	0.0119657	0.0411745	0.046386	0.0090304	0.0354681	0.0199016	0.00927574	0.0239639	0.0270531	0.023064	0.0356177	0.0411092	0.0410388	0.0289933	0.0298268
26	1	0.00945468	0.0258917	0.0219899	0.0117698	0.00919638	0.015267	0.0433317	0.00389975	0.0143915	0.0225135	0.0374106	0.0171186	0.0110366	0.0266006	0.0242622	0.0312809	0.0356201	0.0317879	0.0446007
27	1	0.0103829	0.0138463	0.022163	0.0281002	0.00578634	0.0119567	0.0464463	0.00519724	0.00698955	0.0197578	0.0237725	0.0118509	0.015528	0.0311166	0.0299586	0.0214791	0.0268547	0.0369256	0.0361259
28	1	0.018754	0.00933522	0.0502005	0.00639164	0.00616668	0.0202031	0.0161393	0.0063172	0.0106056	0.0317542	0.020037	0.006355	0.0196442	0.0340582	0.0433915	0.0235214	0.0347495	0.0348667	0.0358506
29	1	0.00695634	0.0167577	0.0170728	0.0139422	0.00728884	0.0196926	0.00882586	0.0138444	0.00907402	0.0188239	0.0445178	0.00828347	0.0236234	0.0307349	0.0310772	0.0251053	0.0328975	0.0353518	0.0227824
30	1	0.00994008	0.0138381	0.0101422	0.0119134	0.00527861	0.0260998	0.0114364	0.0152612	0.0136927	0.0116676	0.0402436	0.0163031	0.00976324	0.0314442	0.0363869	0.0227033	0.0324768	0.0309622	0.0214015
31	1	0.0165474	0.0230596	0.0139314	0.0432438	0.00319267	0.0324898	0.0130157	0.00827428	0.0112835	0.0423858	0.0168708	0.0216981	0.0202544	0.0386418	0.0254703	0.0233318	0.0317704	0.0394075	0.0278032
32	1	0.00682305	0.0254317	0.0257841	0.0578735	0.00640774	0.0105304	0.0163831	0.00717677	0.0126666	0.0126525	0.0140979	0.00835478	0.0253282	0.0283512	0.0352236	0.0320745	0.0309085	0.0247909	0.029185
33	1	0.0227124	0.0239576	0.0286381	0.0480059	0.00386666	0.0108116	0.0270477	0.00551687	0.0150484	0.0158505	0.00682971	0.0143248	0.040885	0.0288241	0.0250396	0.0500131	0.033849	0.0266238	0.0229031
34	1	0.0169782	0.0419414	0.0276235	0.0436387	0.00626344	0.013647	0.0179486	0.00968862	0.0218221	0.0442951	0.0135603	0.00910562	0.00840112	0.0374229	0.0276343	0.0315921	0.0226134	0.0355988	0.0362689
35	1	0.0170219	0.0413554	0.0325885	0.0165509	0.00902361	0.0170483	0.0337782	0.00295459	0.0179411	0.0140981	0.00821076	0.00741871	0.0328466	0.0322012	0.0315011	0.0316222	0.0307762	0.0310936	0.0372199
36	1	0.0193556	0.010966	0.0292471	0.0176824	0.00976732	0.0399357	0.062496	0.0111557	0.0315258	0.0385792	0.0364528	0.0279371	0.0224388	0.027294	0.020757	0.0248609	0.0279206	0.037552	0.0354699
37	1	0.0160324	0.0420807	0.0116945	0.0271975	0.00362599	0.0189533	0.0266843	0.0200628	0.0273631	0.00583217	0.00881321	0.0123424	0.0191922	0.0338527	0.029562	0.0234789	0.0224739	0.03612	0.0382406
38	1	0.00544341	0.0122759	0.00862016	0.0162099	0.00788939	0.0301463	0.0134888	0.0117484	0.0281417	0.0548953	0.0164094	0.00622303	0.056919	0.028157	0.0236679	0.0444434	0.035246	0.0330061	0.0284089
39	1	0.0398912	0.0384835	0.0168375	0.0399499	0.0171192	0.0128913	0.0212454	0.00975826	0.0271748	0.0157834	0.0151323	0.0130639	0.0183563	0.0343071	0.0324116	0.0232319	0.038536	0.0284731	0.0336649
40	1	0.0383142	0.0279285	0.0155534	0.0195524	0.0058194	0.0656675	0.0307643	0.0126752	0.0160735	0.01166	0.0196947	0.0139934	0.0138011	0.0350664	0.0415679	0.0330341	0.0259279	0.0309755	0.0299215
41	1	0.0183023	0.0104938	0.00862619	0.0112974	0.00495134	0.0151696	0.0135579	0.0152784	0.0171421	0.0166147	0.0231177	0.0457823	0.0289028	0.0223356	0.0332427	0.0301658	0.0292985	0.026361	0.0290716
42	1	0.0176986	0.0178512	0.00891388	0.0162266	0.00453796	0.0118852	0.0200785	0.00488104	0.0223265	0.008151	0.0118447	0.0200796	0.0109619	0.0438051	0.0267885	0.0236531	0.0381157	0.023835	0.0262376
43	1	0.0140787	0.0412658	0.0463529	0.0463148	0.0044689	0.00972437	0.0307675	0.00990864	0.0187935	0.0114079	0.00653469	0.00761234	0.0416553	0.0396806	0.0276387	0.0334221	0.0333035	0.027568	0.0312092
44	1	0.0397805	0.0174592	0.0394488	0.0294152	0.00779084	0.0551704	0.0300286	0.00571414	0.0108952	0.0323328	0.00731999	0.00974579	0.0124341	0.0213563	0.0212012	0.0493926	0.0373583	0.0326601	0.0263224
45	1	0.00941158	0.0314046	0.0166557	0.00790621	0.00763671	0.00806356	0.0244953	0.00440227	0.00658328	0.013214	0.0116094	0.0121072	0.0243851	0.028113	0.0387396	0.0186393	0.0338288	0.0221836	0.0244115
46	1	0.0105228	0.0145386	0.0507266	0.0461603	0.00579445	0.00665298	0.0247753	0.0252292	0.011098	0.0331414	0.0214008	0.011259	0.0310314	0.0304758	0.024689	0.021507	0.0138235	0.0466121	0.0242514
47	1	0.0191722	0.0325723	0.0338631	0.0181581	0.00499805	0.0155602	0.0109819	0.0194587	0.0137447	0.0201972	0.011336	0.00973533	0.0132187	0.0227148	0.0284217	0.0300799	0.0337645	0.033939	0.029528
48	1	0.012597	0.00486874	0.00635558	0.0262343	0.00167886	0.0344436	0.0226424	0.0209522	0.00940245	0.0138554	0.0274264	0.0432062	0.0331696	0.0288156	0.0318208	0.0318415	0.0414471	0.0206859	0.0241494
49	1	0.0163567	0.0543333	0.0214598	0.00957423	0.00886592	0.0140466	0.0172828	0.0325323	0.0243431	0.0246608	0.0157248	0.0186459	0.013531	0.028831	0.0230839	0.0404432	0.0242587	0.0280539	0.04067
50	1	0.0152723	0.0230178	0.0174687	0.124109	0.00610816	0.0292496	0.0183018	0.0205001	0.0172305	0.0145361	0.0142169	0.0175978	0.00707387	0.0272056	0.025731	0.0284218	0.0355951	0.0281531	0.0263983
51	1	0.0298877	0.047871	0.0110646	0.0402696	0.00413205	0.0609109	0.0299727	0.00700189	0.0205227	0.0276153	0.00621417	0.0244609	0.0215545	0.0302686	0.0275274	0.0214244	0.0308558	0.0303736	0.027813
52	1	0.0115856	0.0399761	0.0157261	0.0366742	0.0186434	0.0511865	0.0159294	0.0112181	0.0191305	0.00475879	0.0136163	0.00773167	0.0512294	0.0310161	0.0267423	0.0263047	0.0345651	0.0277872	0.0372045
53	1	0.0229978	0.0221536	0.0273544	0.0266967	0.00418769	0.0371781	0.0329262	0.0135012	0.0142906	0.047579	0.015479	0.00930266	0.0112142	0.0284968	0.0441217	0.0303567	0.035347	0.0226425	0.017705
54	1	0.00366551	0.0119339	0.010441	0.0298605	0.00816948	0.0216757	0.0240536	0.011493	0.0344114	0.00760921	0.0153838	0.0197908	0.00606533	0.0158665	0.0321255	0.0303584	0.0311839	0.0304994	0.0304934
55	1	0.0262655	0.0342501	0.0158632	0.0166948	0.00335506	0.0167942	0.0408285	0.01243	0.00943441	0.0148239	0.0145959	0.0127859	0.0176662	0.0334477	0.0189082	0.0461839	0.0334678	0.0247744	0.0290902
56	1	0.0139401	0.0115345	0.0295543	0.0484394	0.00283145	0.00994991	0.0153074	0.00301946	0.0440101	0.0124985	0.0345791	0.029766	0.0271859	0.0288156	0.0262444	0.0356037	0.0412277	0.0271575	0.0253325
57	1	0.00630694	0.0190819	0.0173432	0.0351466	0.00580724	0.0786628	0.0250787	0.00328574	0.016224	0.00951213	0.0177626	0.0174086	0.0244287	0.0220593	0.0445367	0.0378576	0.0236487	0.0227224	0.0304755
58	1	0.0199694	0.012527	0.013575	0.0256056	0.00408448	0.0261919	0.0135414	0.00644902	0.0123219	0.00962808	0.0231934	0.0381799	0.00781213	0.0273469	0.0245611	0.0298357	0.0258175	0.0252509	0.0350951
59	1	0.00892997	0.0115841	0.017612	0.0253745	0.00311296	0.0214729	0.0440787	0.00802693	0.0116616	0.0285256	0.00662143	0.0169286	0.0261574	0.0271643	0.0305488	0.0320618	0.029493	0.0341767	0.0336785
60	1	0.0222872	0.0221876	0.0234173	0.0173523	0.0087366	0.015394	0.0140091	0.00227338	0.0271525	0.0133999	0.0272768	0.0134246	0.00806421	0.0342122	0.026266	0.038056	0.0275535	0.0447308	0.025767
61	1	0.0185183	0.0143161	0.0271786	0.0282183	0.0108225	0.0215251	0.0298121	0.00493605	0.0512749	0.0139538	0.0205767	0.0203433	0.0162339	0.0274269	0.0216823	0.0439604	0.027681	0.0298918	0.0357126
62	1	0.0113147	0.0262314	0.0110424	0.0484663	0.00459426	0.0303168	0.0652653	0.00866406	0.0127318	0.0210699	0.0186674	0.0314573	0.0162202	0.060675	0.0313588	0.0389128	0.032376	0.0203533	0.0325962
63	1	0.015561	0.0245675	0.0215328	0.0598192	0.010821	0.0441329	0.0109526	0.00973379	0.00697472	0.0248692	0.00810757	0.0199875	0.00922844	0.030375	0.0305332	0.0285829	0.0233119	0.0267286	0.0334315
64	1	0.014538	0.0110075	0.0186658	0.0538498	0.0057887	0.0174528	0.0072579	0.0122255	0.0474632	0.0250757	0.0153327	0.0534577	0.0408839	0.0326529	0.021395	0.0319751	0.0413079	0.0387573	0.0298867
65	1	0.0181174	0.0133288	0.0213685	0.0679167	0.00209678	0.0165632	0.0175173	0.0154866	0.0299886	0.032848	0.0233427	0.00651356	0.0142385	0.0232283	0.0380119	0.0308676	0.0434963	0.0267257	0.0250175
66	1	0.0357822	0.0338822	0.0185639	0.0402055	0.00264577	0.022987	0.0114449	0.0106838	0.0172445	0.00517138	0.0292571	0.0214761	0.0024269	0.0265399	0.0286096	0.0405811	0.0172685	0.0345557	0.0427314
67	1	0.0149603	0.016728	0.0200332	0.0206318	0.00723818	0.0372027	0.0334153	0.00926974	0.0065579	0.0145767	0.0107647	0.00545254	0.0273816	0.0323372	0.0281461	0.0240871	0.0210506	0.0225847	0.0298848
68	1	0.00892561	0.0174404	0.0105753	0.0161804	0.00338719	0.0721916	0.0167842	0.0212309	0.0188247	0.0266247	0.0106844	0.0101912	0.00785471	0.0242748	0.020904	0.0284132	0.0300918	0.0244647	0.0185692
69	1	0.0118976	0.0468835	0.0094585	0.0139973	0.0198147	0.0436659	0.0370607	0.011261	0.0271334	0.0273927	0.0126203	0.00496848	0.00757247	0.0364928	0.0330235	0.0368775	0.0295304	0.0359395	0.0389303
70	1	0.0138093	0.0390001	0.0196362	0.0221851	0.00507621	0.0157385	0.0192087	0.00476809	0.0110892	0.0124773	0.0225568	0.021581	0.0309397	0.0327344	0.023595	0.0314753	0.0288952	0.0315519	0.0332182
71	1	0.0278642	0.0473565	0.0444162	0.0361662	0.00374915	0.0154501	0.00425959	0.00844543	0.0138807	0.0154023	0.00975087	0.0087922	0.0172136	0.0311114	0.0347527	0.0355784	0.0338383	0.0259822	0.0284455
72	1	0.123793	0.0281623	0.00906288	0.0371782	0.00789754	0.0147769	0.0246692	0.0100082	0.0104315	0.0196902	0.00755012	0.0279368	0.0257023	0.0266759	0.032402	0.0355816	0.0415986	0.0350975	0.0430783
73	1	0.0149642	0.0374329	0.0178735	0.0405183	0.00944987	0.0300698	0.0221186	0.00494363	0.0157651	0.0284368	0.0182331	0.00523719	0.0148077	0.0331476	0.0265075	0.0301635	0.0242359	0.0351478	0.0370466
74	1	0.0172898	0.0543243	0.010175	0.0299874	0.00543051	0.0180469	0.0349437	0.00312301	0.0127182	0.053286	0.0350917	0.00737102	0.0127745	0.0343755	0.027316	0.0335766	0.0334814	0.0363016	0.0285195
75	1	0.0264638	0.0360195	0.040802	0.019779	0.010648	0.0350205	0.0397258	0.0150248	0.0604231	0.0206346	0.017536	0.012927	0.0190488	0.0308182	0.0266915	0.021179	0.02482	0.0303446	0.0407519
76	1	0.0161865	0.0382161	0.0280368	0.023476	0.0112285	0.0150056	0.0144391	0.00722887	0.0122509	0.0143798	0.0444818	0.0141684	0.0239993	0.0321197	0.0288072	0.0347877	0.0279376	0.037084	0.0238311
77	1	0.00776398	0.00856224	0.0294931	0.0321971	0.00566872	0.0189518	0.0170359	0.0108695	0.0102627	0.028602	0.0198336	0.0147792	0.0101903	0.0259626	0.0206552	0.0221949	0.0381017	0.048819	0.0330976
78	1	0.0122035	0.0126033	0.0325007	0.0776734	0.00527873	0.0161418	0.0225222	0.0208403	0.0172426	0.0110327	0.0233985	0.0179197	0.00598505	0.0338093	0.0325099	0.0272961	0.02052	0.0247038	0.0236826
79	1	0.0172992	0.0130554	0.0337115	0.0204531	0.00533399	0.0613108	0.0266106	0.00755856	0.0322885	0.0114399	0.0204977	0.00771087	0.0430574	0.0226706	0.0361796	0.0367004	0.0327085	0.0377688	0.0293589
80	1	0.0116424	0.0150225	0.0288486	0.0461751	0.00514352	0.0417835	0.0230995	0.00685932	0.00562239	0.0152111	0.0255622	0.0072442	0.00818629	0.0306002	0.0221077	0.0208431	0.0298185	0.0279665	0.0283539
81	1	0.031321	0.0190707	0.021205	0.013543	0.00586204	0.0409371	0.0210477	0.00966481	0.0138912	0.0448729	0.0122427	0.0162521	0.0123767	0.0268534	0.0263875	0.0235205	0.0283036	0.0333061	0.0264371
82	1	0.0182143	0.0127695	0.0311593	0.041842	0.00254923	0.00938304	0.0222752	0.00549671	0.0316795	0.0173175	0.00670132	0.00884178	0.0206453	0.0370268	0.030679	0.0323614	0.0362396	0.026489	0.0347436
83	1	0.00824157	0.0113664	0.0260068	0.0213103	0.00203865	0.0628116	0.0280153	0.00486461	0.029339	0.0206252	0.0152515	0.0354482	0.0154277	0.0277537	0.0243243	0.025607	0.0309202	0.0241579	0.0334603
84	1	0.0221548	0.0192866	0.0421942	0.0474394	0.00550091	0.0226368	0.0424923	0.00655062	0.0185476	0.0189221	0.00990725	0.0213367	0.0120149	0.0352824	0.0373098	0.0392672	0.0227522	0.0338315	0.0398997
85	1	0.0152593	0.0146349	0.0288864	0.0579731	0.00605391	0.0217381	0.0166171	0.0180336	0.0121637	0.0237418	0.0100859	0.0254835	0.00467869	0.0300774	0.0260719	0.0309672	0.0194637	0.0300265	0.0358951
86	1	0.0353242	0.0287965	0.0219686	0.0317145	0.0127254	0.0204207	0.0236617	0.00272821	0.0188086	0.0105413	0.0079255	0.00937506	0.0125468	0.0329161	0.0347839	0.0325166	0.0296036	0.0273884	0.0251734
87	1	0.0274518	0.0558804	0.012629	0.0349071	0.00276722	0.0138523	0.0299941	0.0081009	0.0074054	0.0076928	0.0127819	0.0108103	0.0433292	0.0275782	0.02915	0.0326867	0.0234843	0.0299366	0.0376832
88	1	0.00636259	0.0124784	0.0321922	0.0146525	0.0120063	0.0198125	0.0215711	0.00649426	0.0135379	0.00992293	0.0204889	0.00685371	0.0188898	0.0230012	0.0267122	0.0336232	0.0302733	0.0202516	0.0306298
89	1	0.0115415	0.0487063	0.0311679	0.017211	0.00718938	0.0272351	0.0743397	0.0176564	0.03035	0.0286111	0.0157505	0.00833269	0.0114592	0.0231261	0.0399455	0.0220682	0.0275872	0.0336677	0.0434573
90	1	0.0231035	0.0140298	0.0364028	0.0210862	0.0126727	0.0216639	0.013914	0.00775188	0.0184135	0.0103375	0.0383897	0.00813595	0.0221223	0.0277463	0.0302904	0.0230672	0.0193738	0.0331069	0.0300477
91	1	0.0173807	0.0576523	0.0157284	0.00659871	0.00423574	0.0333571	0.0145619	0.00964116	0.0175608	0.00952491	0.0292666	0.0267113	0.0122479	0.0305972	0.0204261	0.0322471	0.0314452	0.038117	0.0269984
92	1	0.0356814	0.0267027	0.0115967	0.029338	0.0107086	0.00930181	0.0237036	0.0152414	0.0108765	0.0175348	0.00658575	0.00892918	0.012399	0.0248846	0.0294228	0.0357172	0.0248092	0.0314837	0.0250479
93	1	0.0108181	0.0102759	0.0153397	0.0206988	0.00395586	0.0210093	0.0120293	0.0158464	0.0261875	0.0198404	0.0158326	0.0180126	0.00692856	0.0342513	0.0226902	0.031259	0.031749	0.0250844	0.0321742
94	1	0.0120487	0.0342496	0.0157436	0.0273121	0.00517914	0.0114429	0.0467102	0.0127916	0.0215679	0.00893247	0.00726	0.0101568	0.0117096	0.0305781	0.0269604	0.04232	0.0367254	0.0331221	0.02014
95	1	0.0100826	0.00956248	0.0463376	0.0370822	0.00424598	0.0138032	0.0177804	0.00761841	0.0243301	0.029952	0.0100251	0.0281994	0.0218552	0.0246516	0.0261857	0.0387332	0.0406133	0.0251669	0.0274232
96	1	0.00911565	0.0600342	0.0171412	0.01976	0.00494521	0.0129116	0.0115475	0.0137618	0.00504302	0.0325069	0.0371626	0.0228853	0.0256473	0.0278115	0.0318757	0.0282009	0.0253809	0.0397753	0.0314943
97	1	0.00988311	0.038059	0.0113021	0.0329523	0.00413856	0.00619142	0.0259977	0.00599096	0.0245514	0.0152434	0.0224324	0.0089793	0.0153796	0.0348316	0.0373758	0.0341404	0.0355742	0.0283196	0.0361901
98	1	0.0239398	0.0224586	0.0734652	0.0612971	0.00888393	0.0130055	0.0236782	0.0103633	0.0115035	0.0208237	0.0160081	0.0389659	0.0725566	0.0316055	0.0327131	0.0251434	0.0279545	0.036574	0.0418978
99	1	0.0101304	0.0275346	0.035904	0.0191334	0.00236948	0.0690497	0.0101155	0.016588	0.0195357	0.0138252	0.0196919	0.0207858	0.0157574	0.0413363	0.0255636	0.0238792	0.0364218	0.0255304	0.0322425
100	1	0.0151479	0.0315977	0.0208713	0.0182242	0.00917695	0.0367538	0.0217743	0.00648983	0.0756791	0.0243889	0.0347561	0.0173465	0.0157084	0.0154274	0.032701	0.0292909	0.0267308	0.0231561	0.0263761

[truncated: 14 more sheets: Clearance Trials SS, Substrate Clearance Values, % fm and fe SS, Absorption, Conc Trials Profiles(CPlasma), Conc Profiles CSys(CPlasma), C.Profiles(Cols)(Sub), CLint profiles, AUC0(Sub)(CPlasma), Distribution - Vols, Distribution - Kps, 4-OH - CYP2D6, 4-OH - CYP2C19, PV Conc Profiles(CPlasma)]
